# Supplementary material for: Widespread alterations in white matter microstructure in autism: A multilevel meta-analysis
Source: Research Square preprint supplement (doi:10.21203/rs.3.rs-7411531/v1), 2025-09-23

**Figure S1.** Forest plots for 10 white matter tracts.

1. Cerebellar peduncles

**
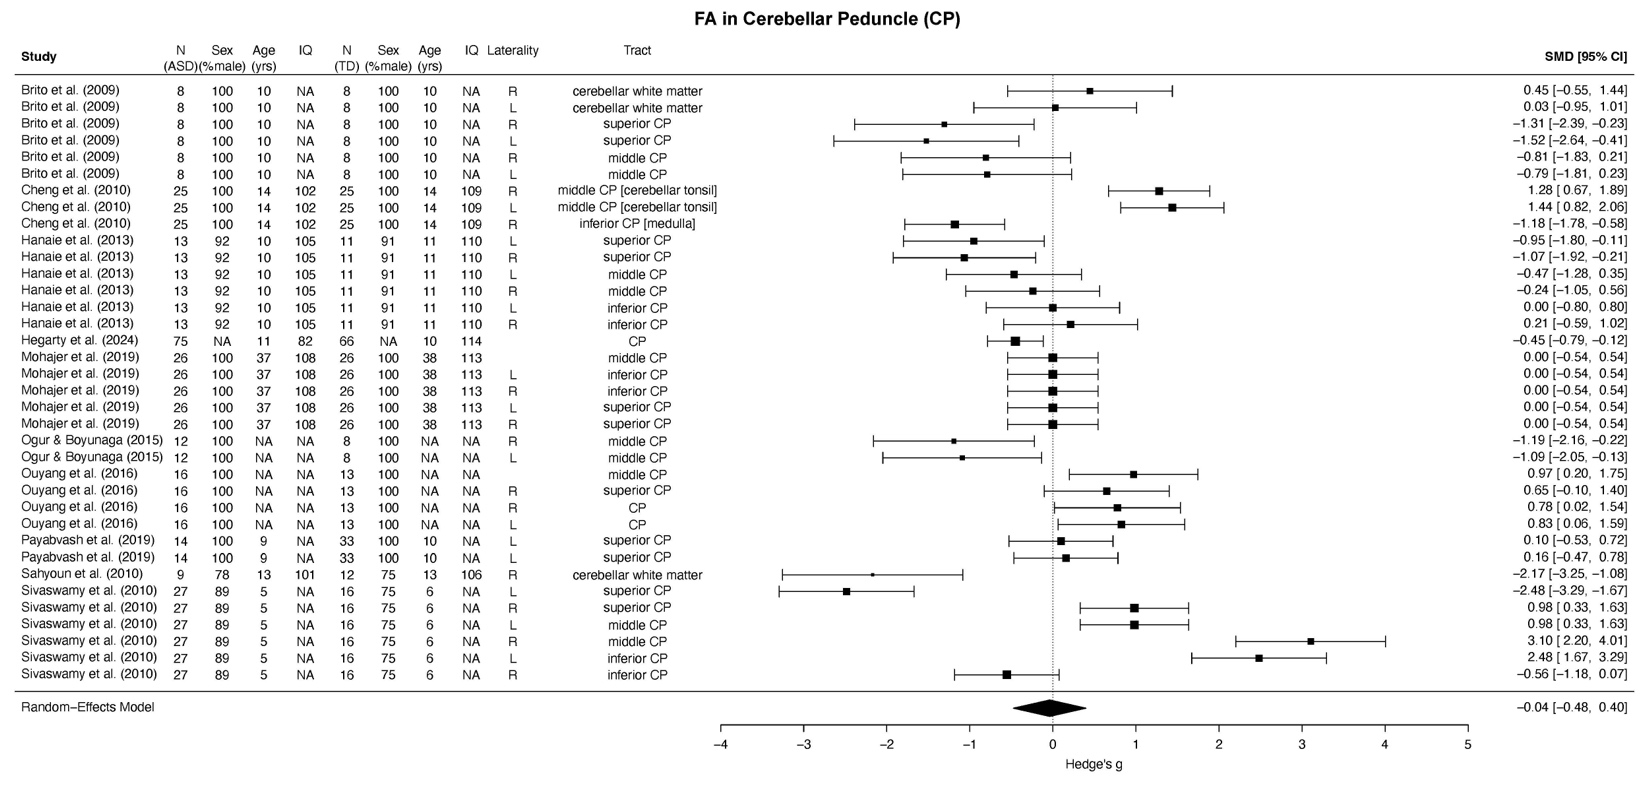

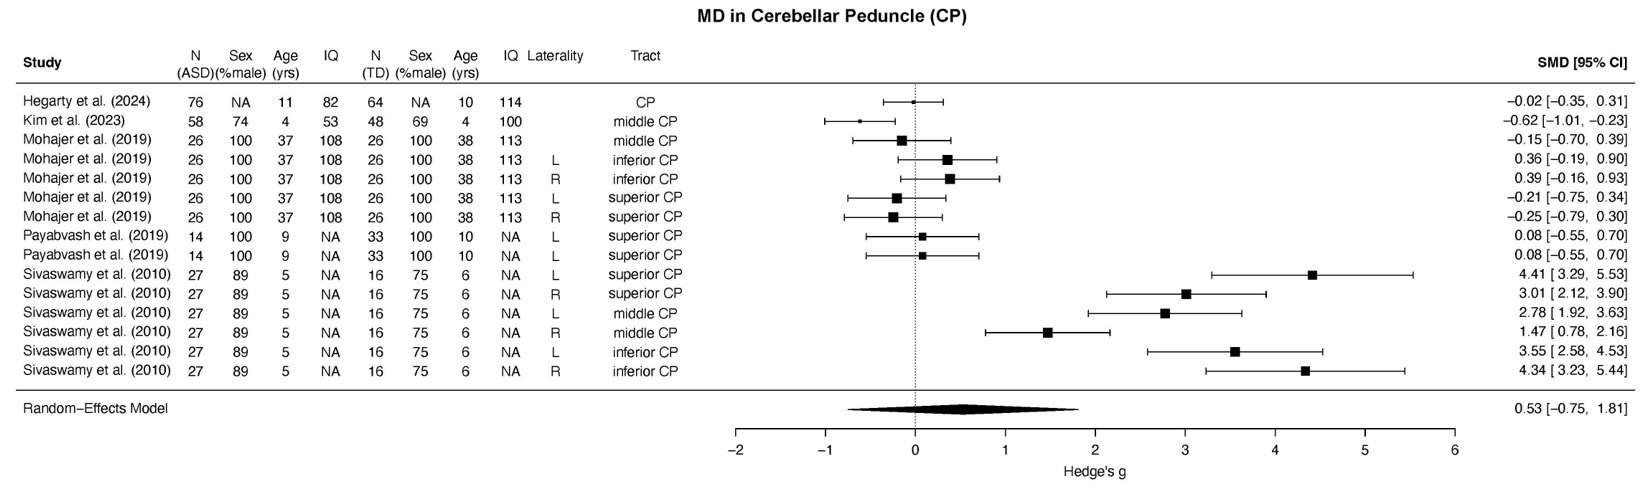
**

*Note.* All effect sizes, including influential cases, are presented, and the summary effect sizes on the plots reflect initial estimates.

1. Corona radiata


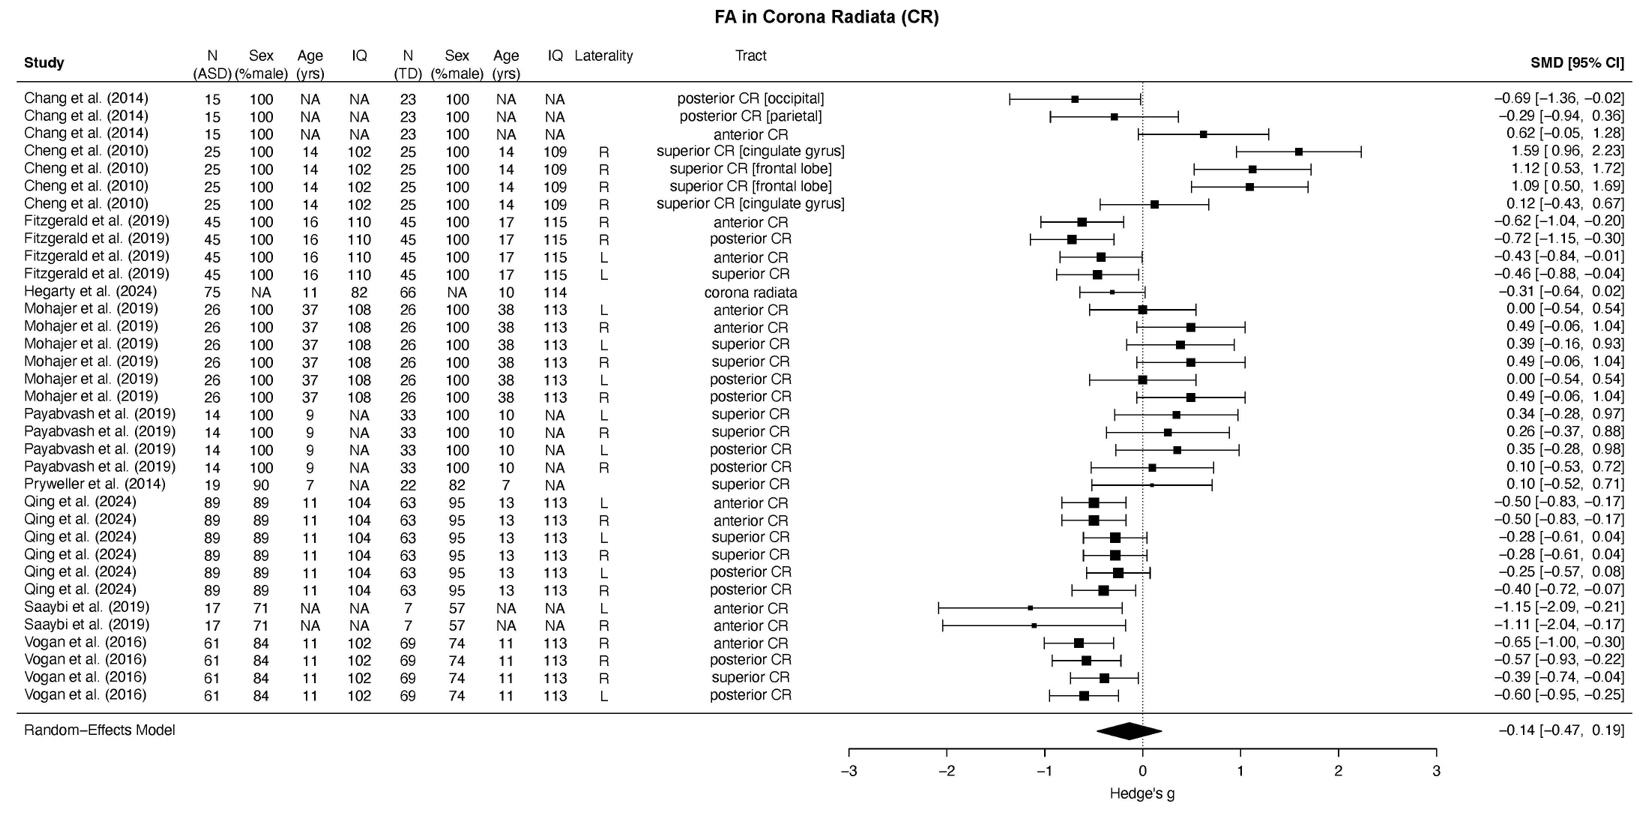

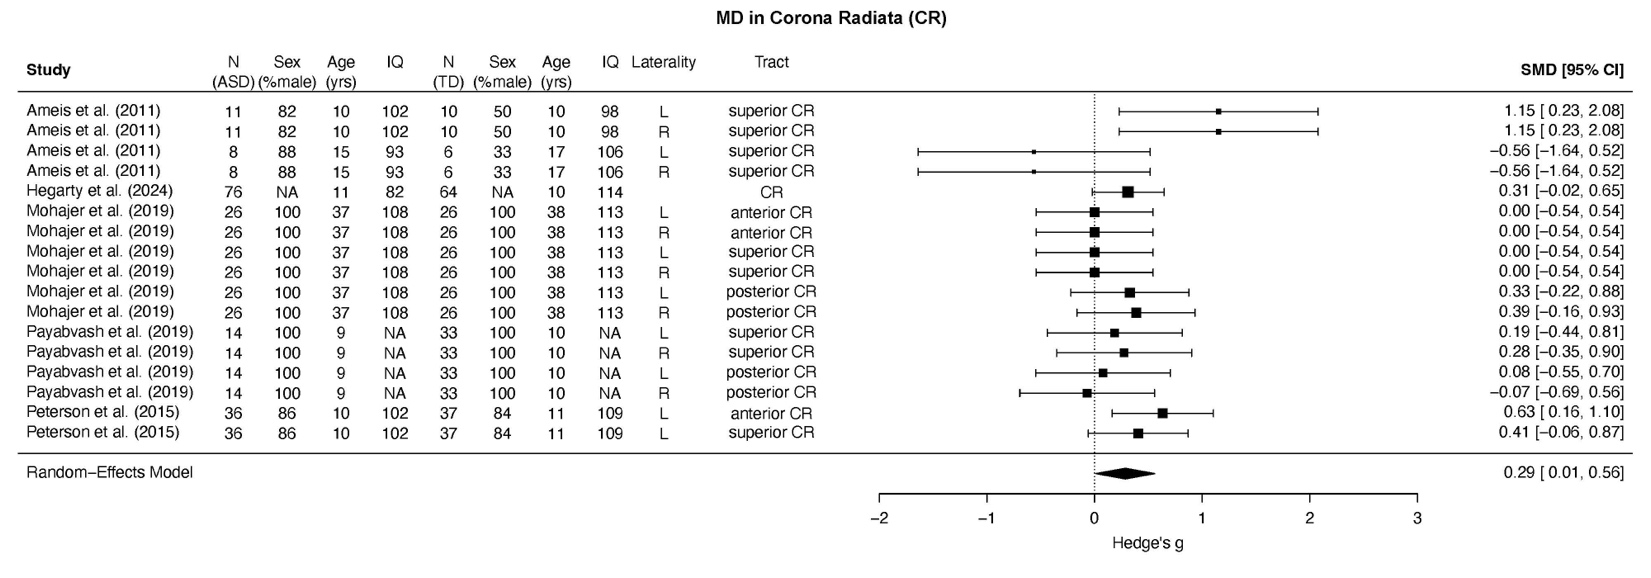


*Note.* All effect sizes, including influential cases, are presented, and the summary effect sizes on the plots reflect initial estimates.

1. Corticospinal tract


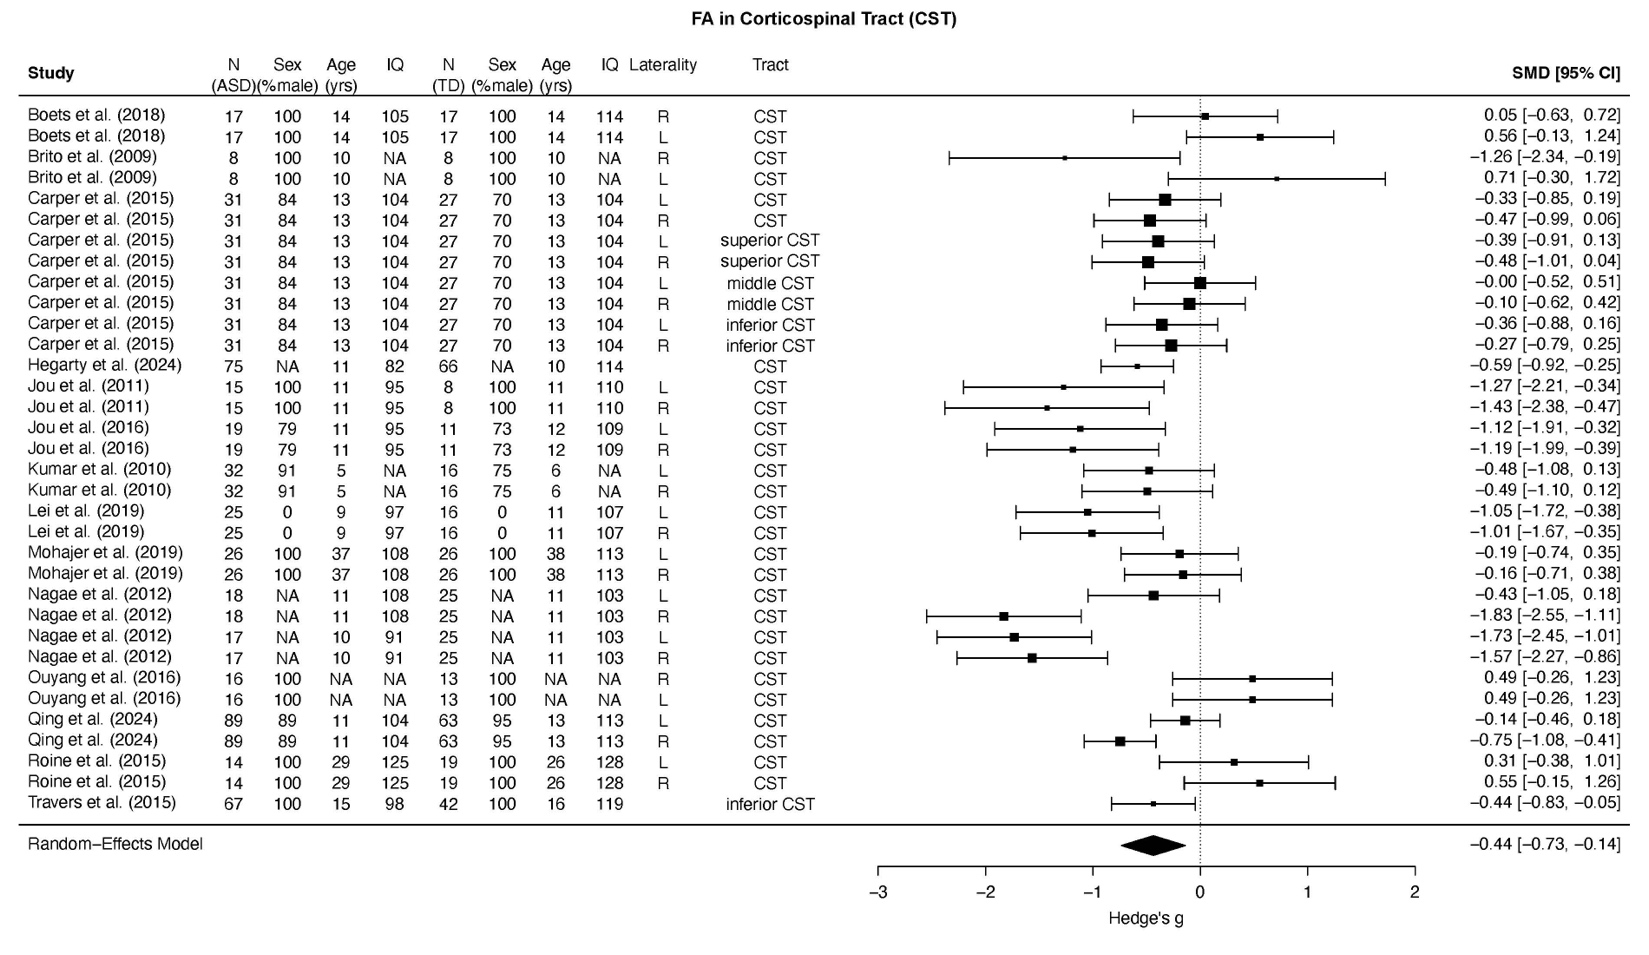

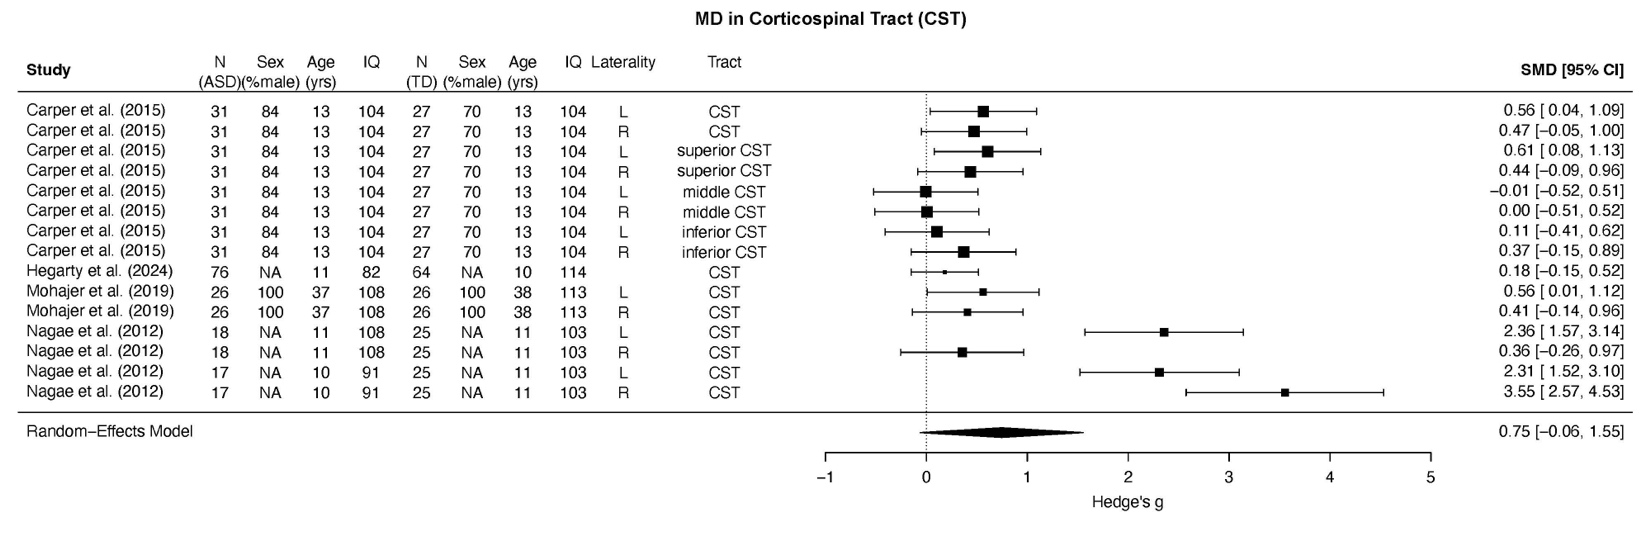


*Note.* All effect sizes, including influential cases, are presented, and the summary effect sizes on the plots reflect initial estimates.

1. Internal capsule


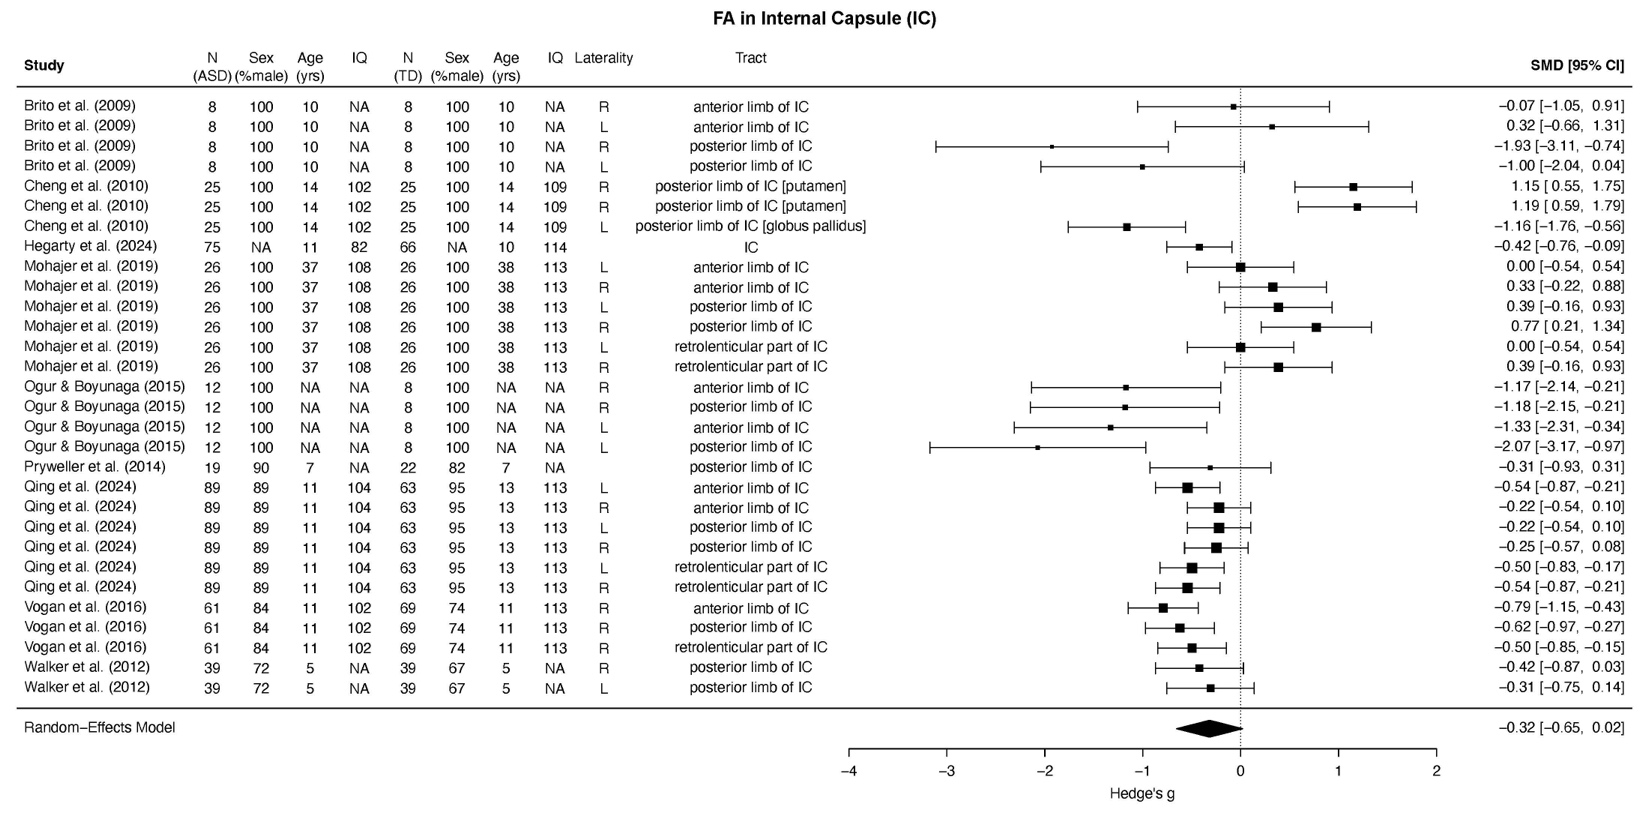

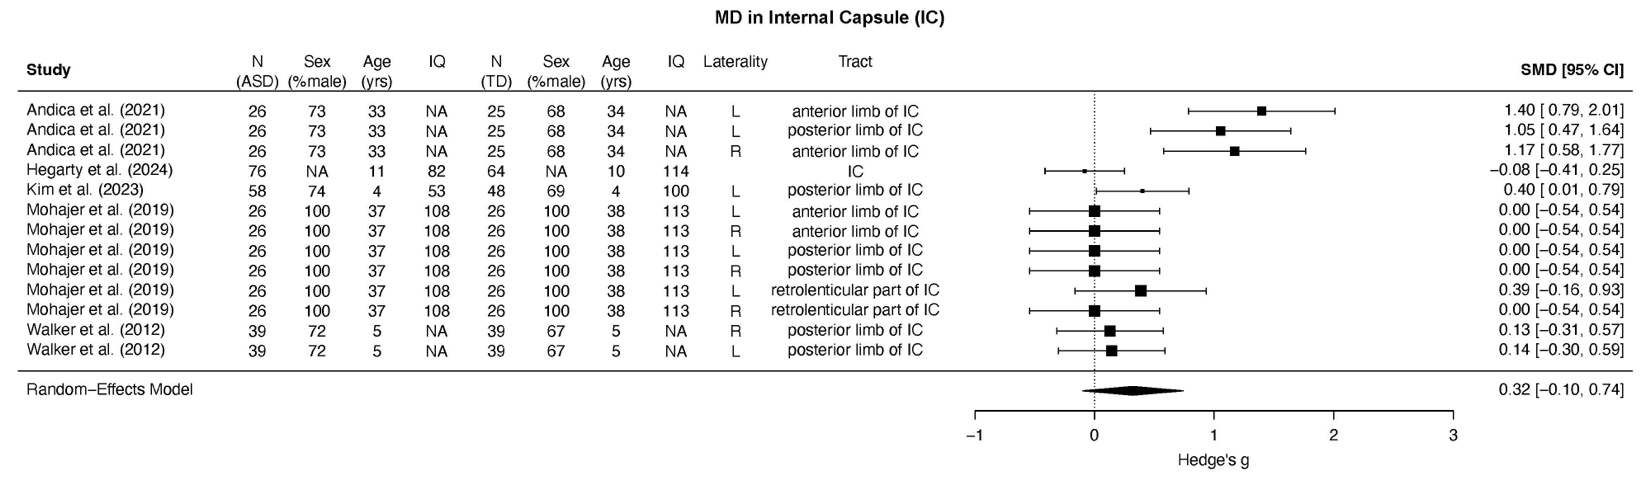


*Note.* All effect sizes, including influential cases, are presented, and the summary effect sizes on the plots reflect initial estimates.

1. Thalamic radiation


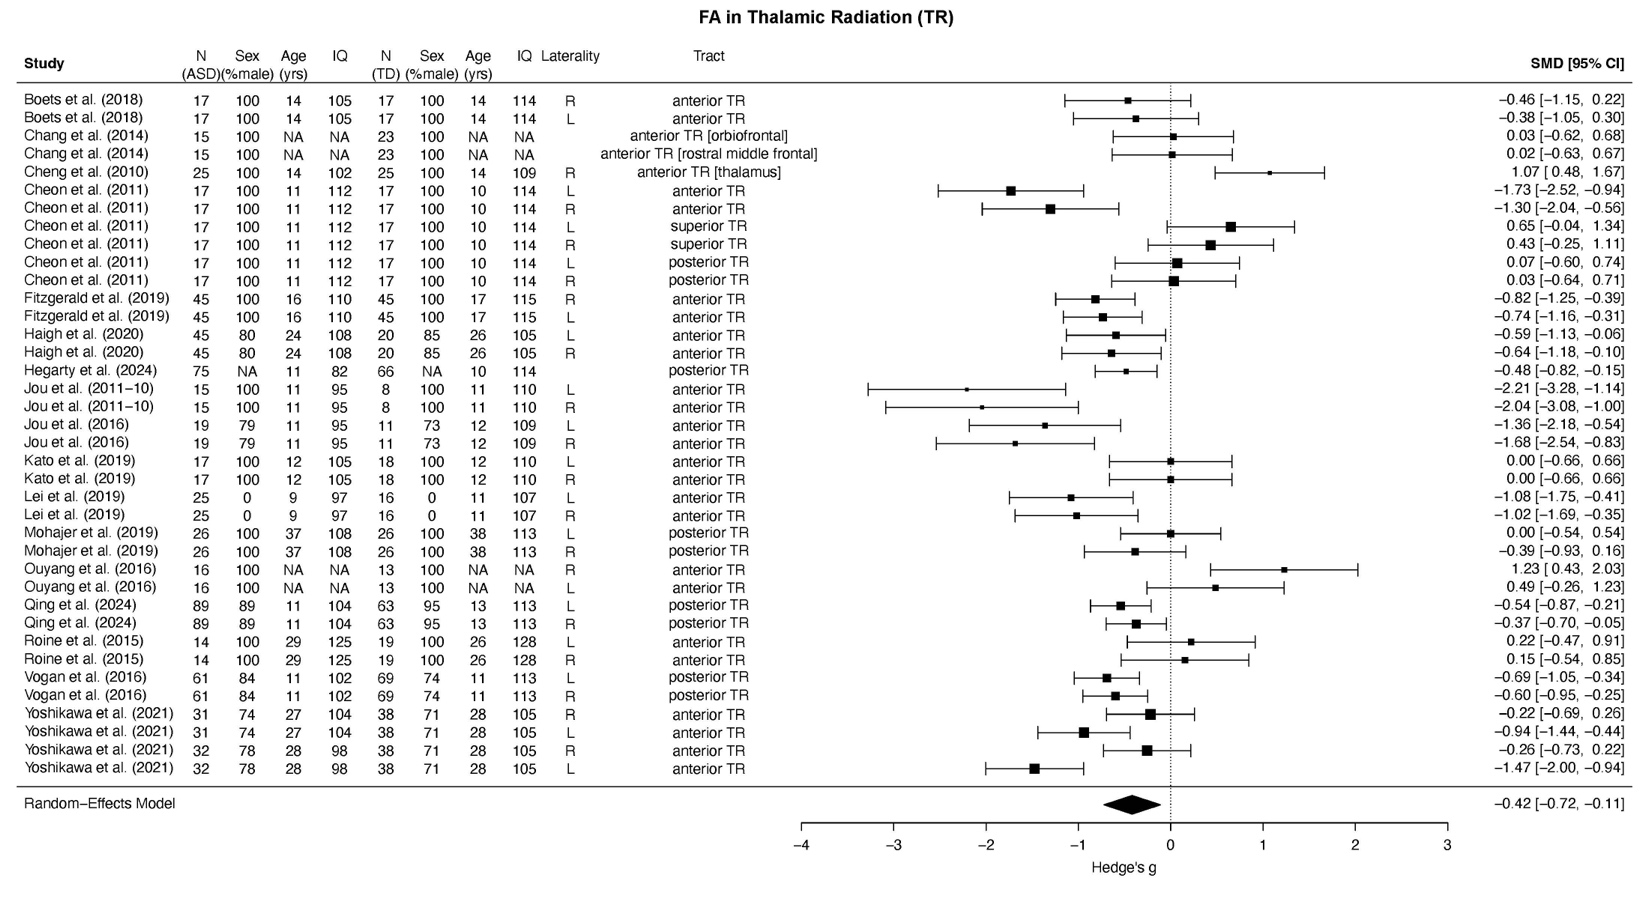

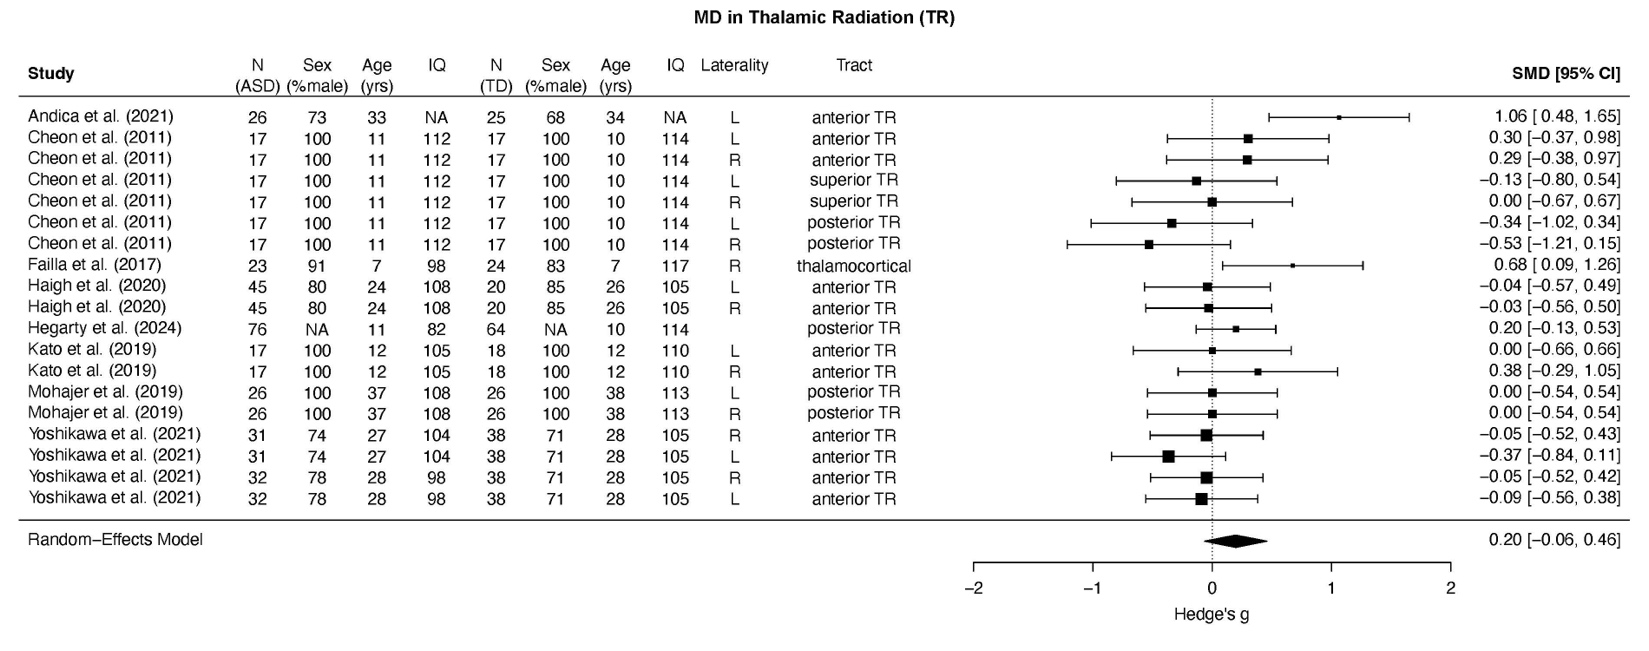


*Note.* All effect sizes, including influential cases, are presented, and the summary effect sizes on the plots reflect initial estimates.

1. Arcuate fasciculus


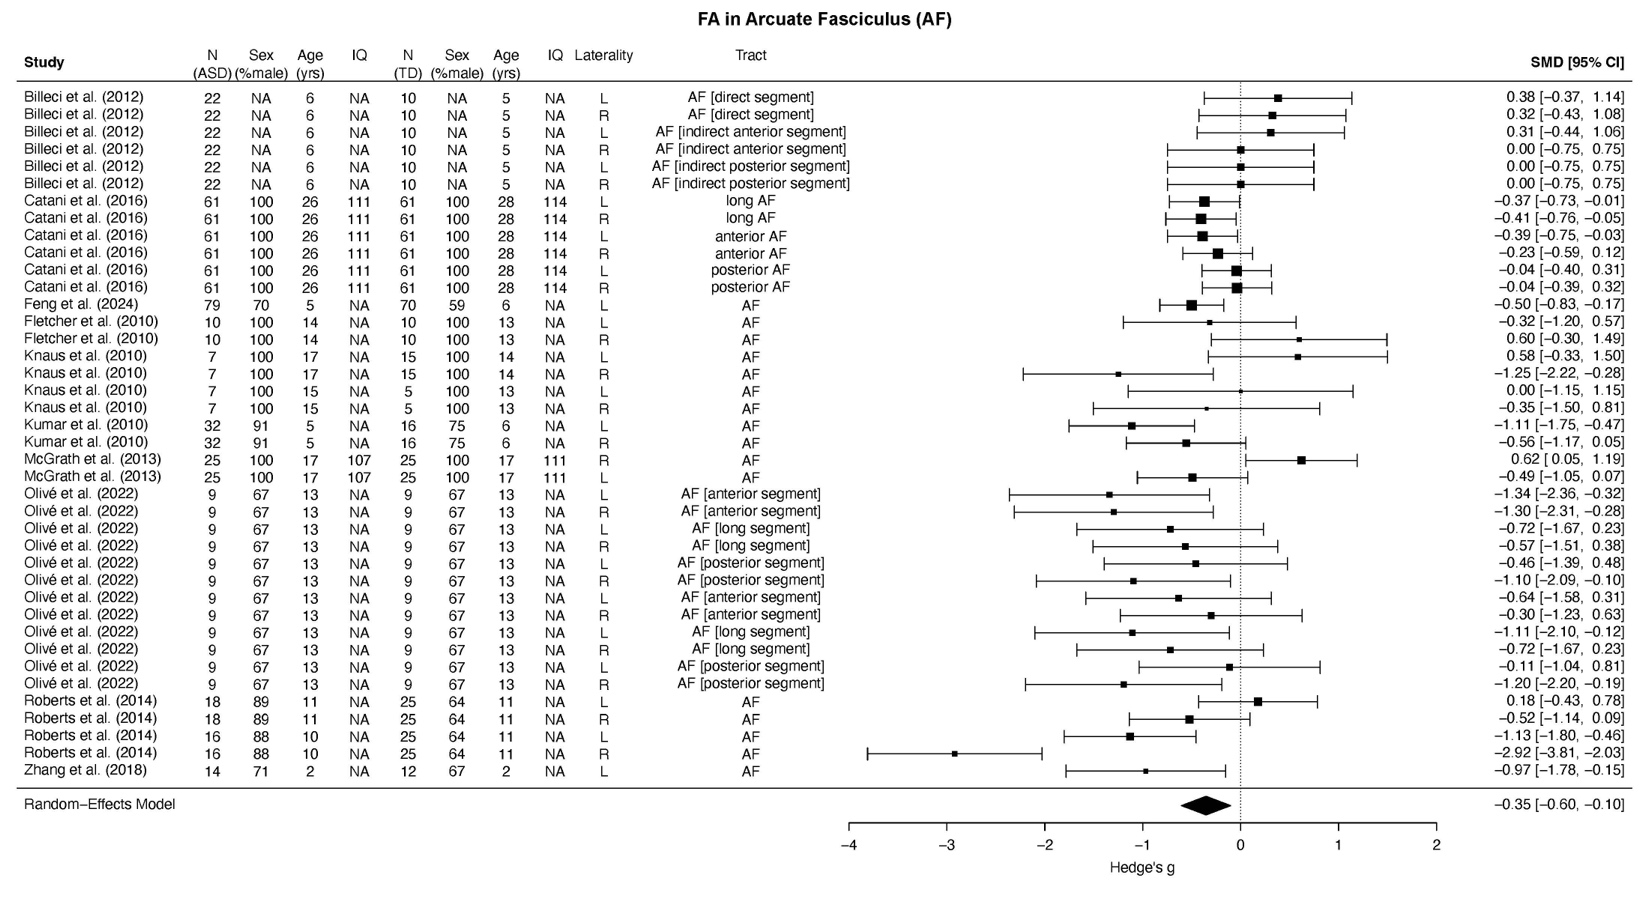

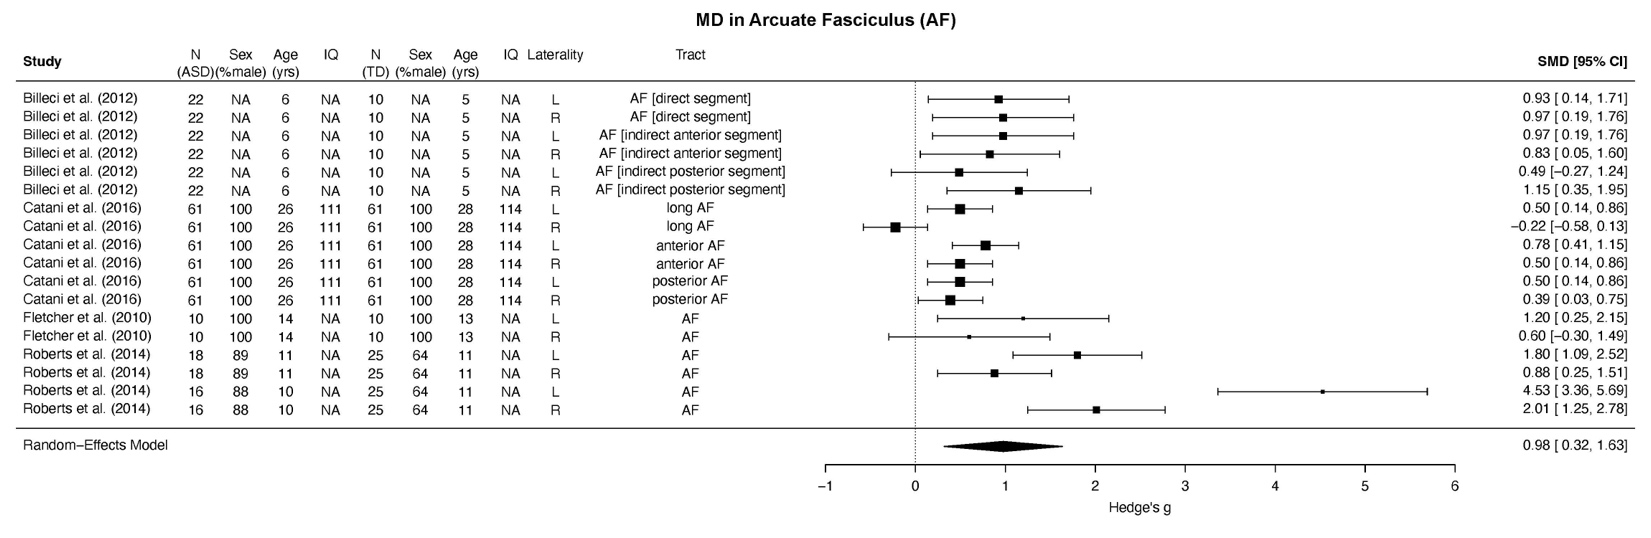


*Note.* All effect sizes, including influential cases, are presented, and the summary effect sizes on the plots reflect initial estimates.

1. Inferior fronto-occipital fasciculus


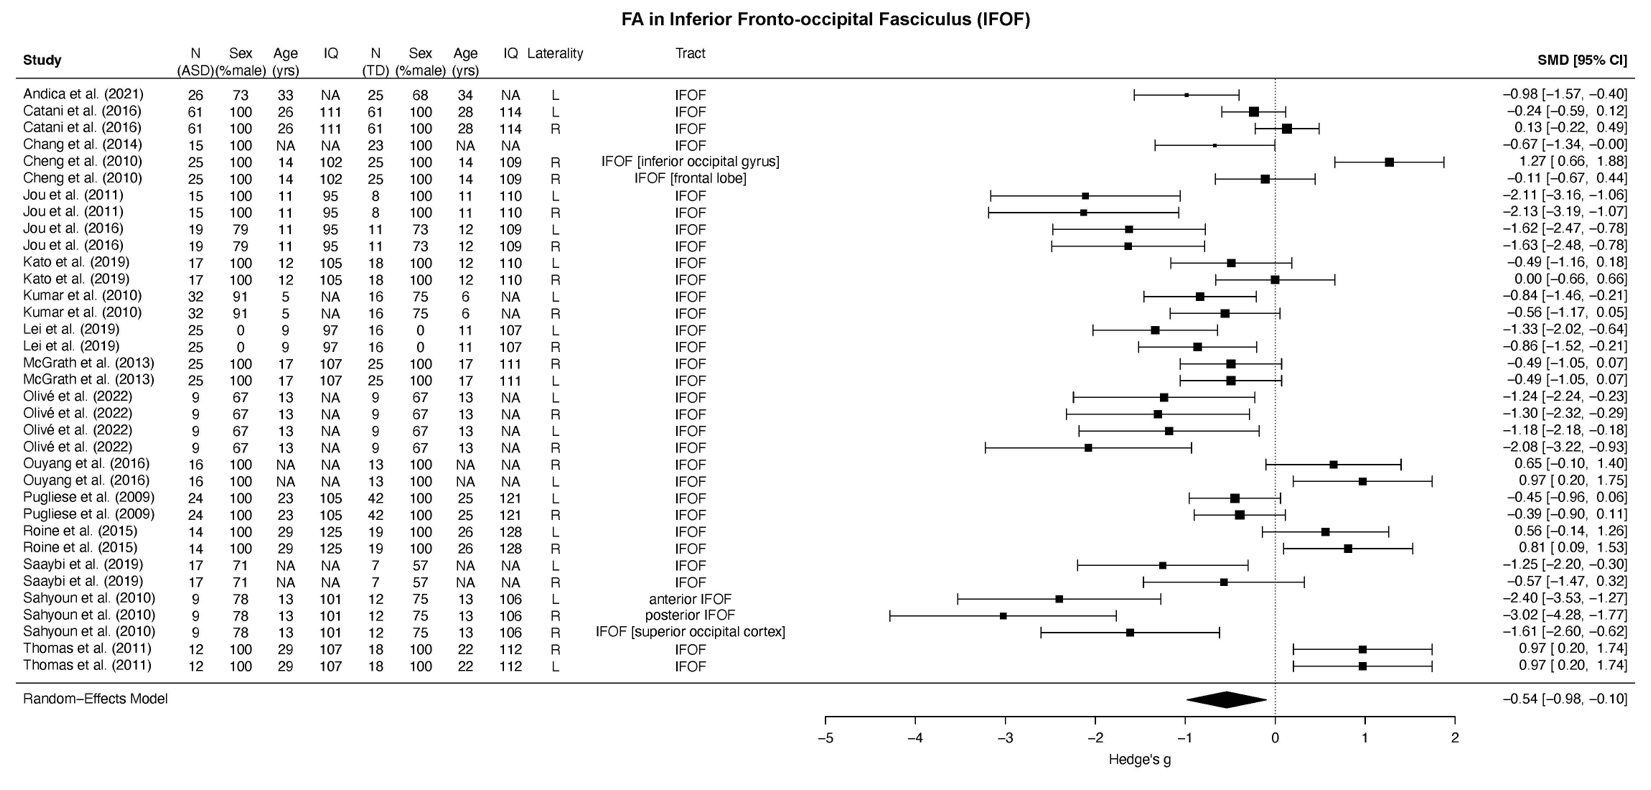

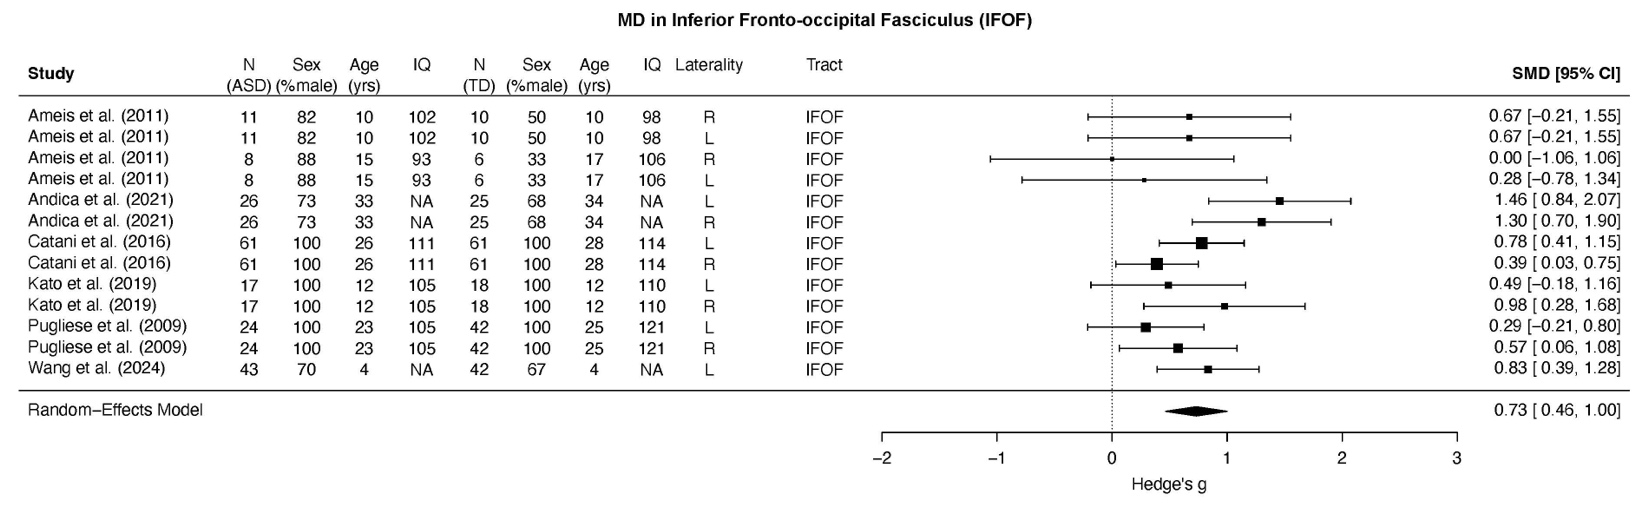


*Note.* All effect sizes, including influential cases, are presented, and the summary effect sizes on the plots reflect initial estimates.

1. Inferior longitudinal fasciculus


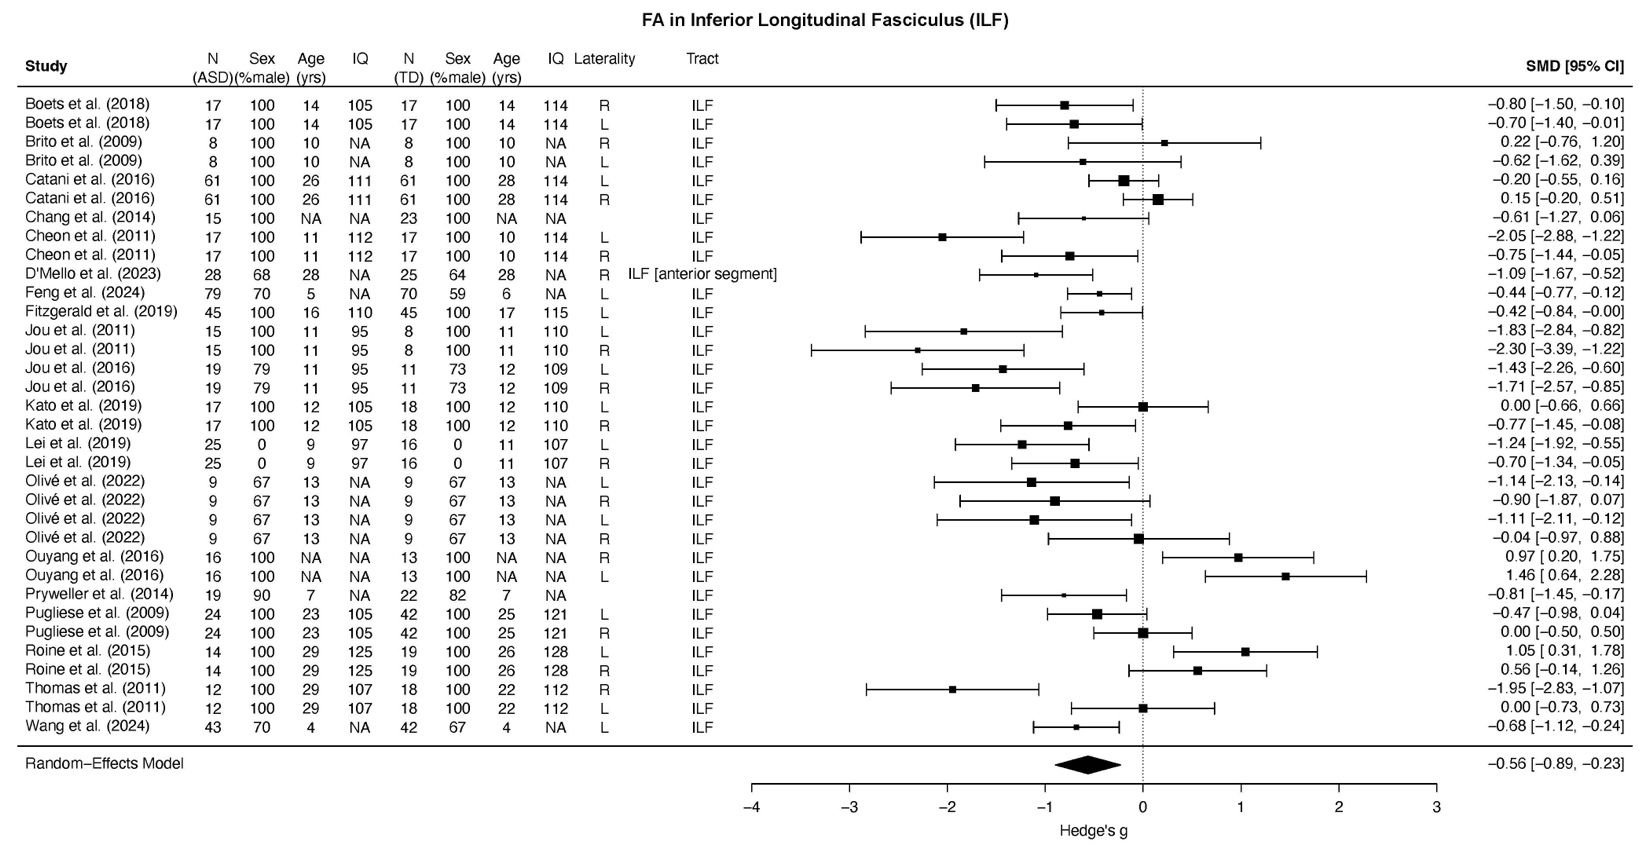

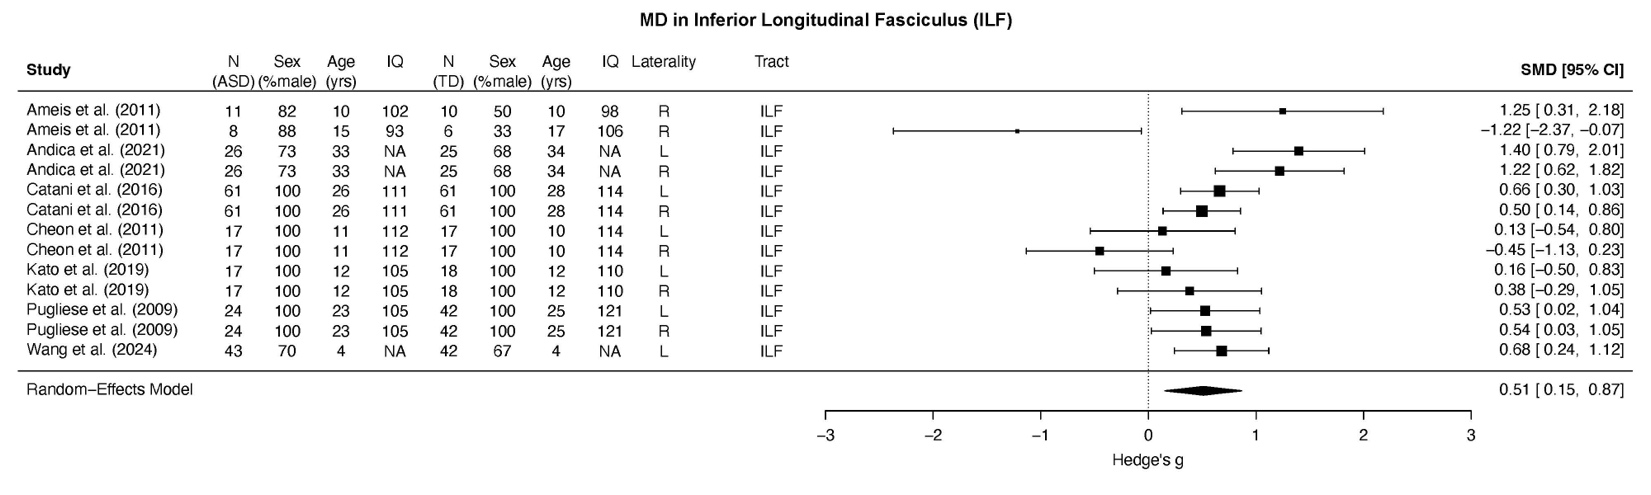


*Note.* All effect sizes, including influential cases, are presented, and the summary effect sizes on the plots reflect initial estimates.

1. Superior longitudinal fasciculus


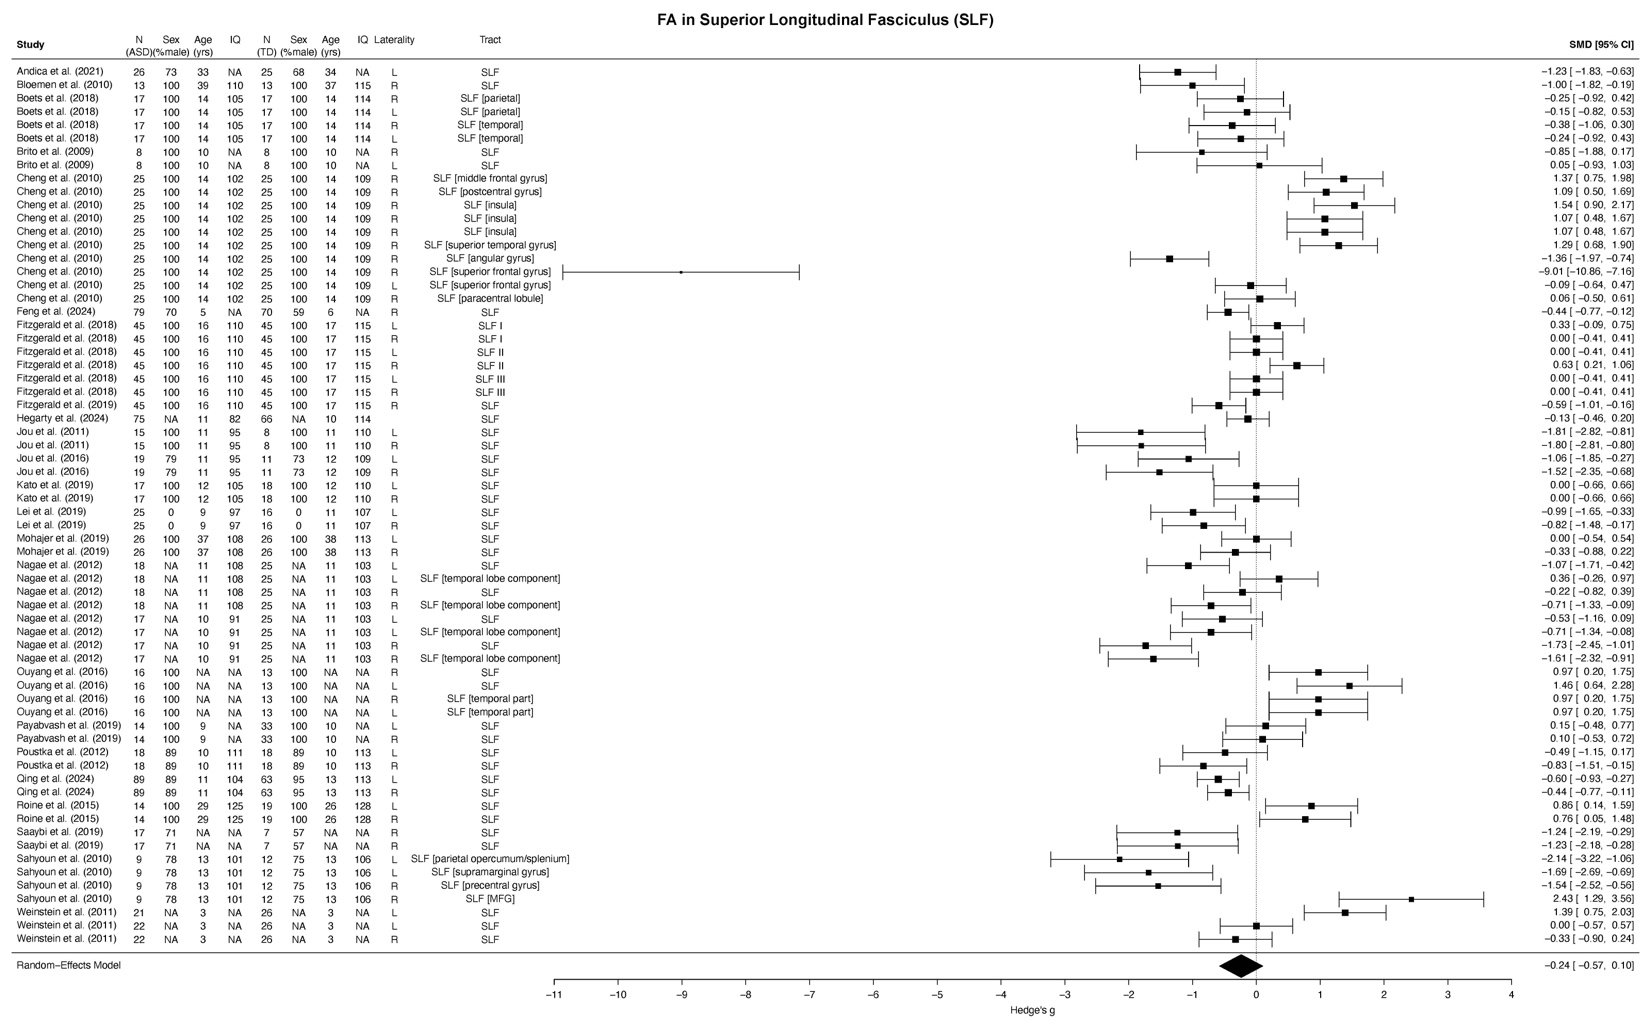

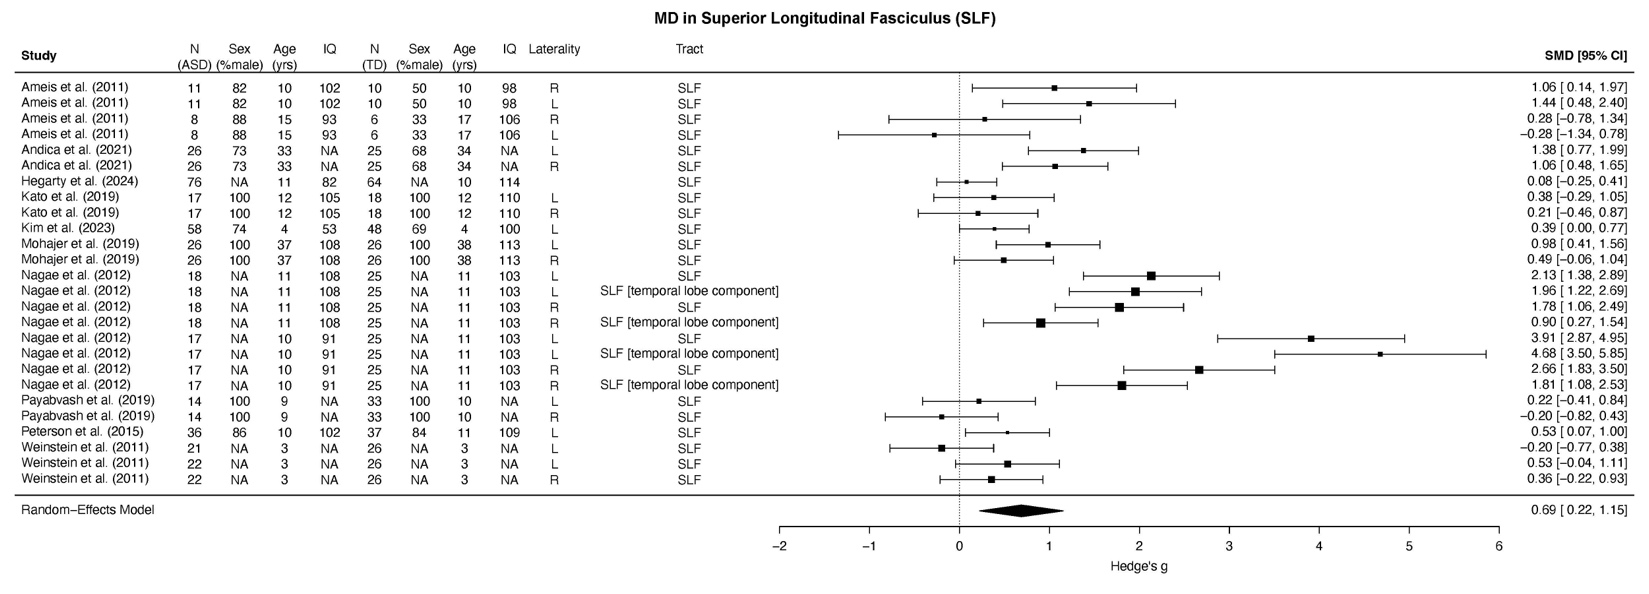


*Note.* All effect sizes, including influential cases, are presented, and the summary effect sizes on the plots reflect initial estimates.

1. Uncinate fasciculus


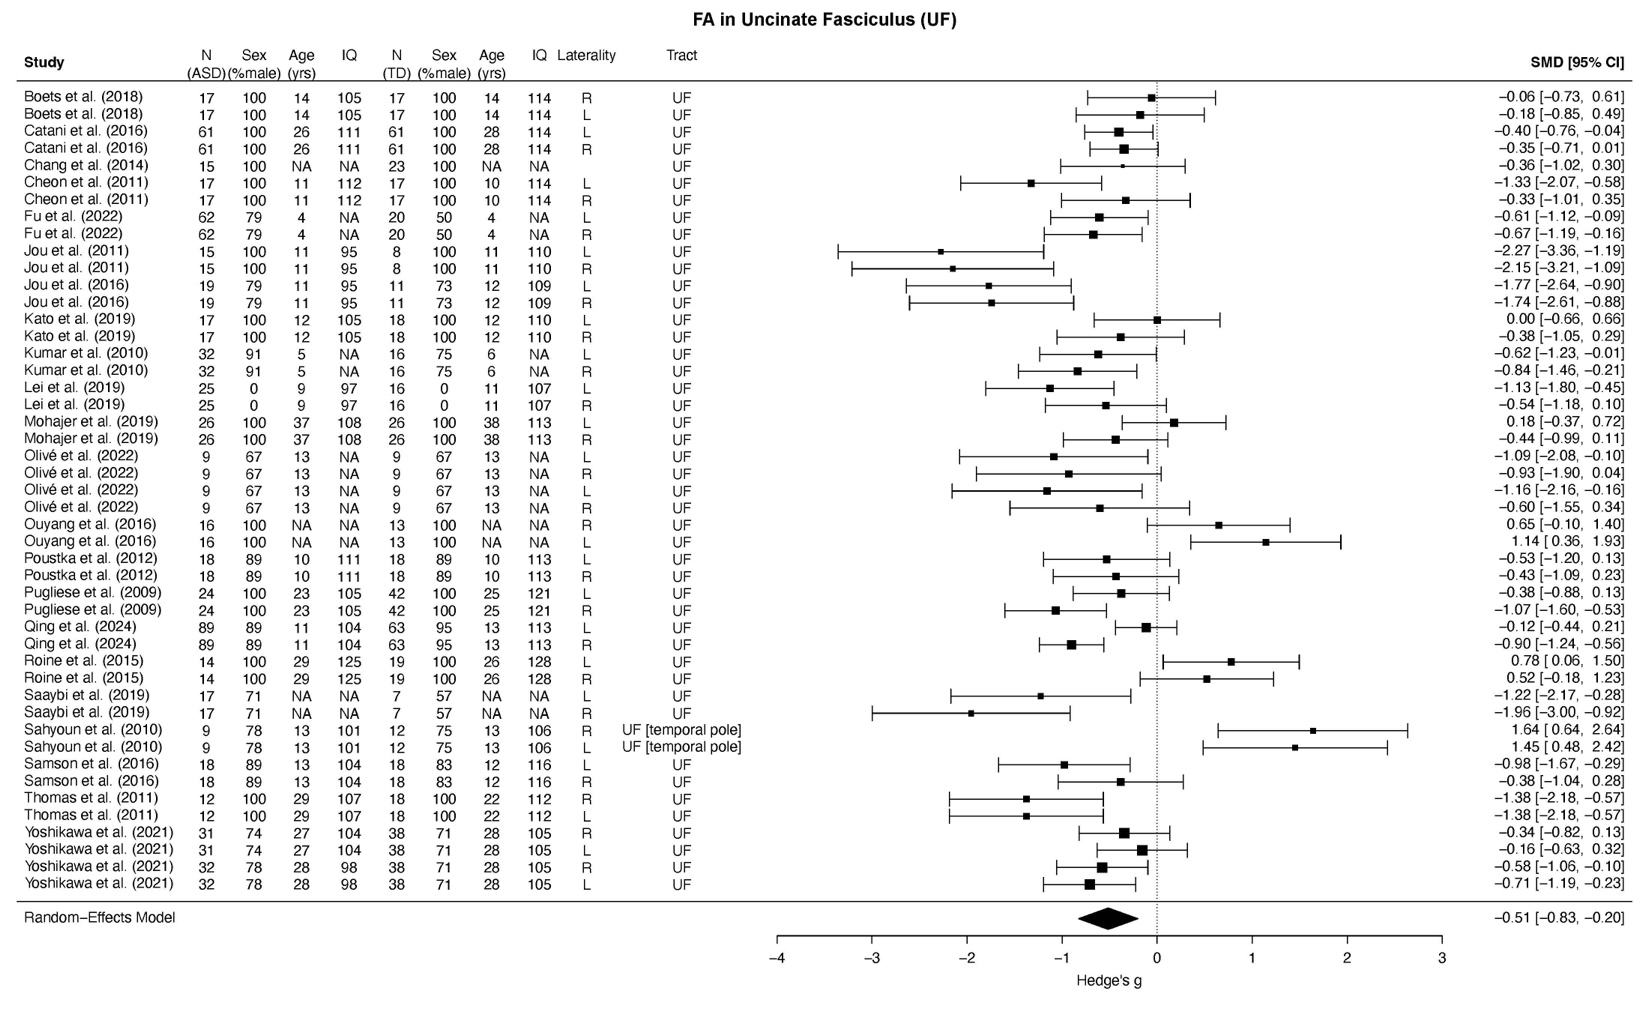

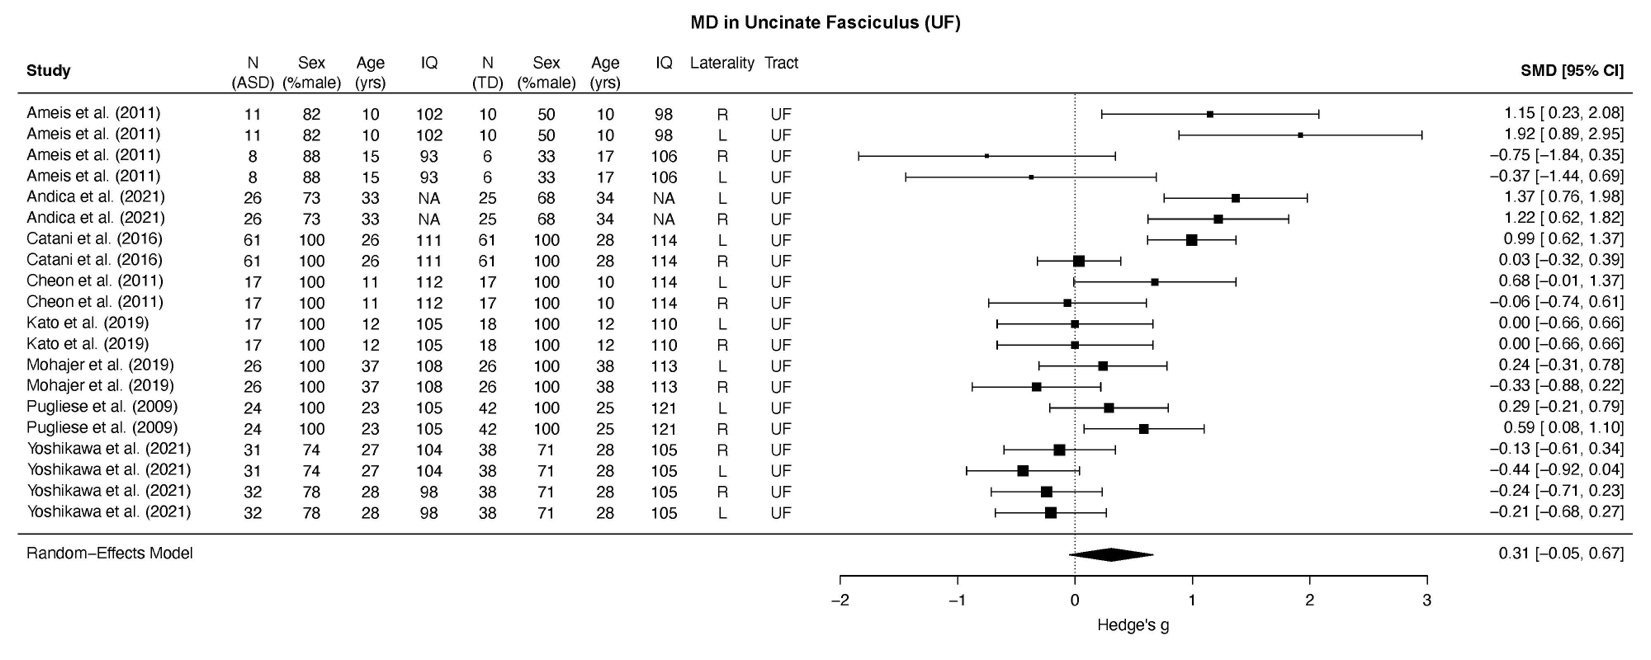
*Note.* All effect sizes, including influential cases, are presented, and the summary effect sizes on the plots reflect initial estimates.

**Figure S2.** Funnel plots for 10 white matter tracts.

1. Cerebellar peduncles


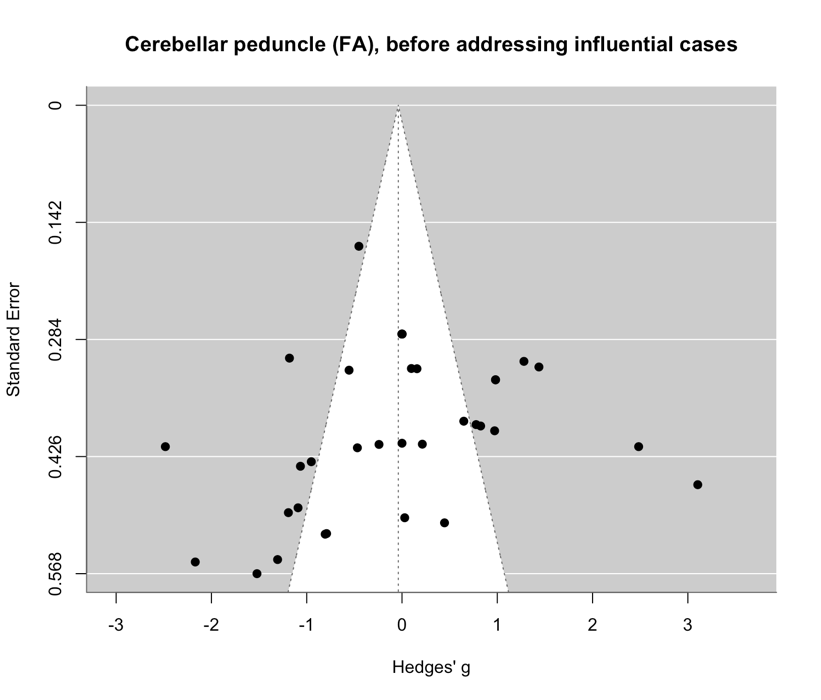

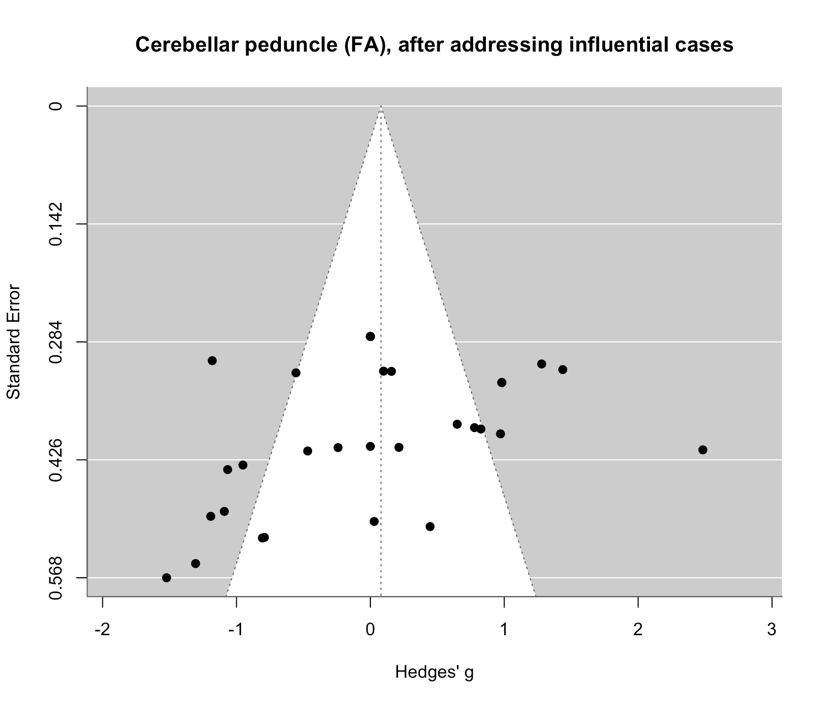

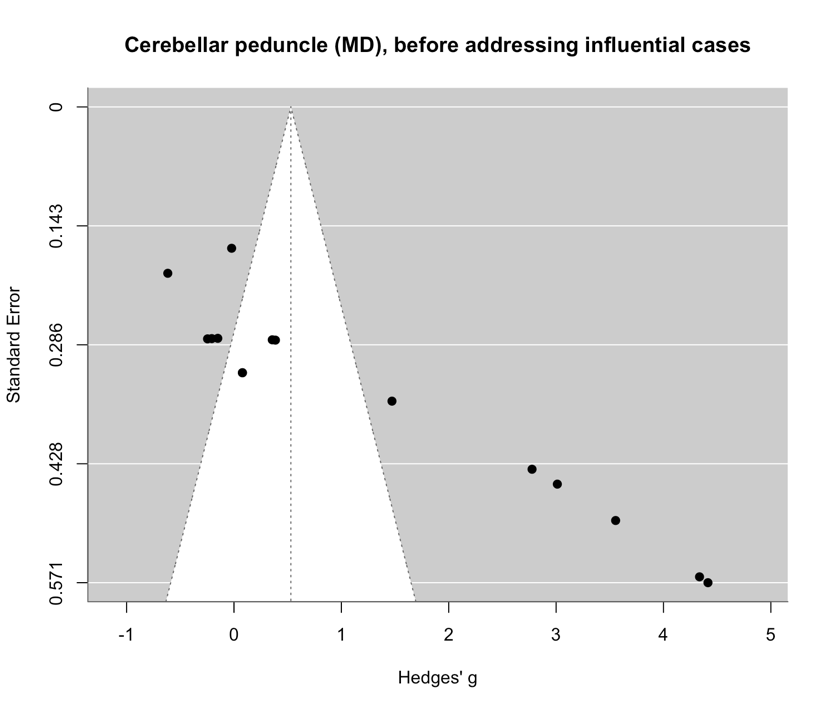

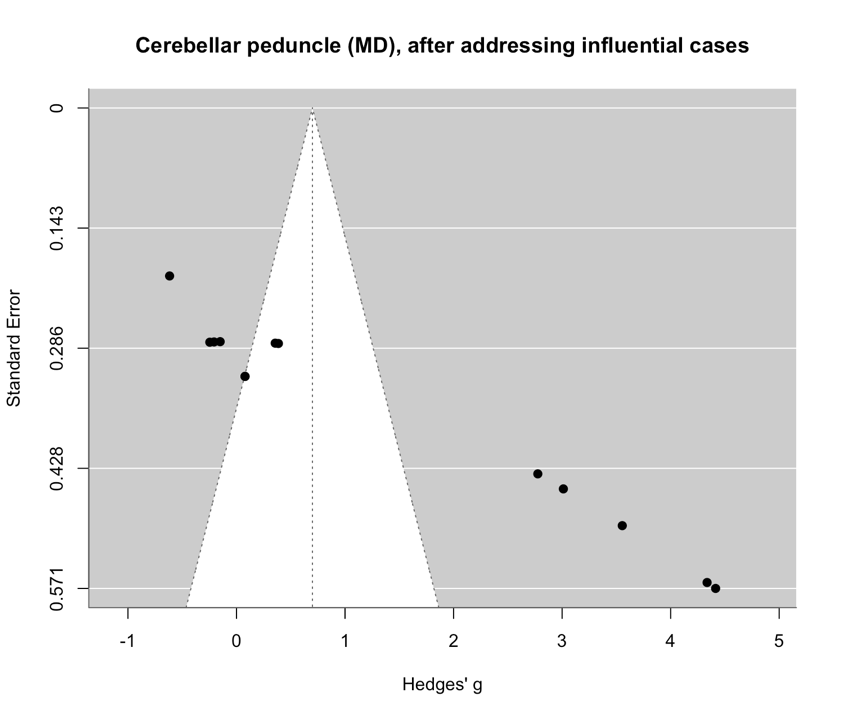


1. Corona radiata


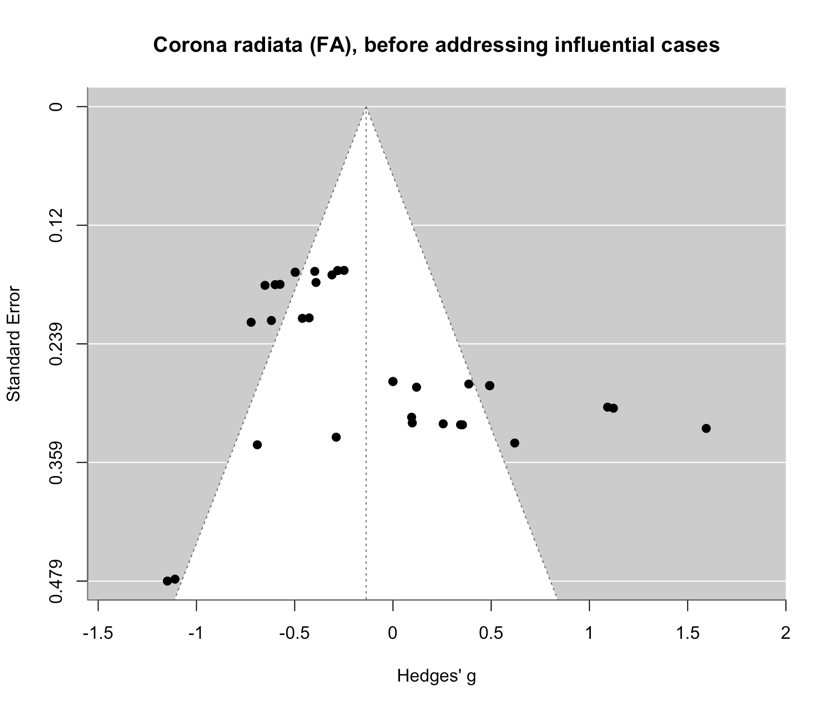

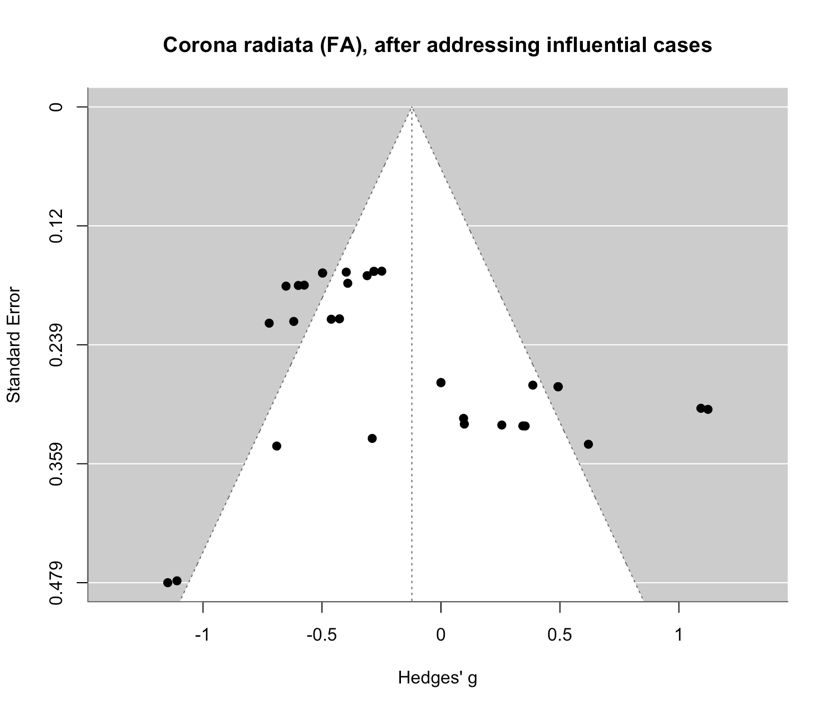

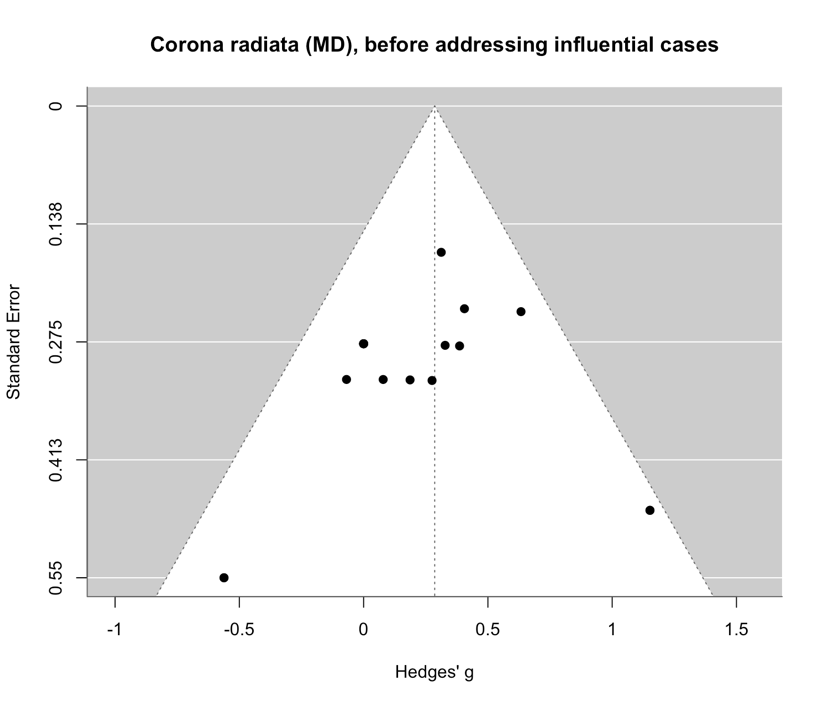

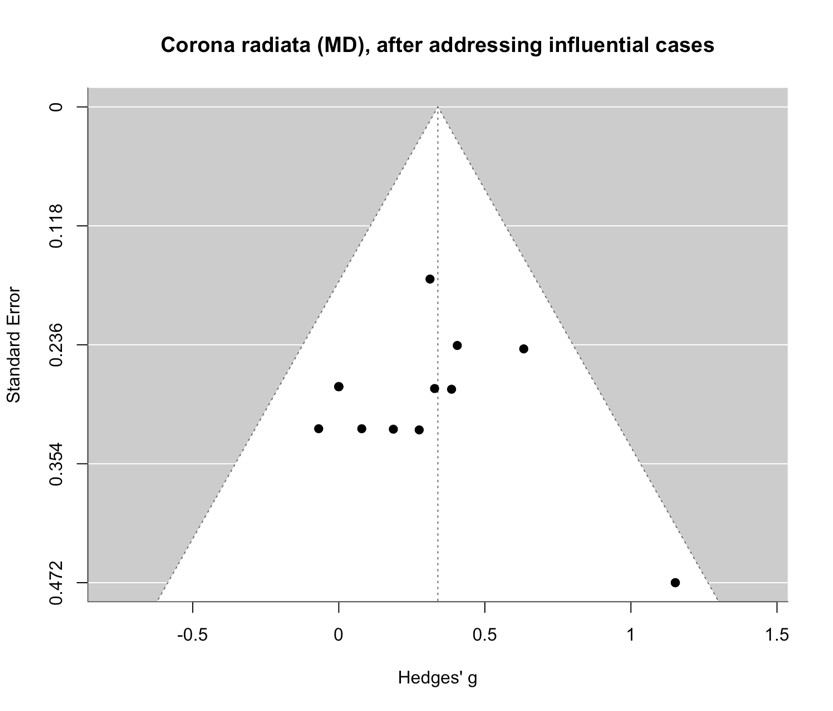


1. Corticospinal tract


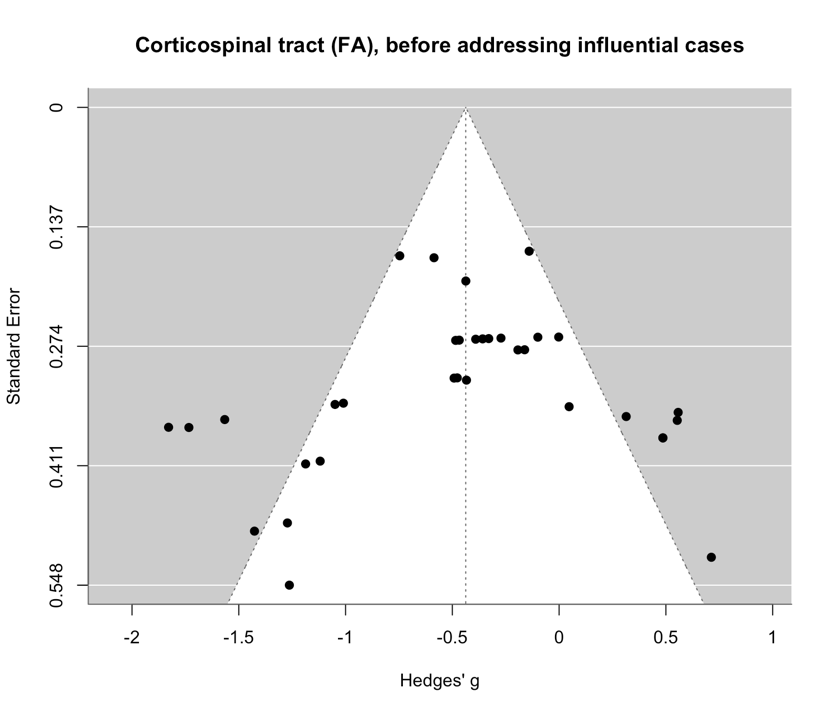

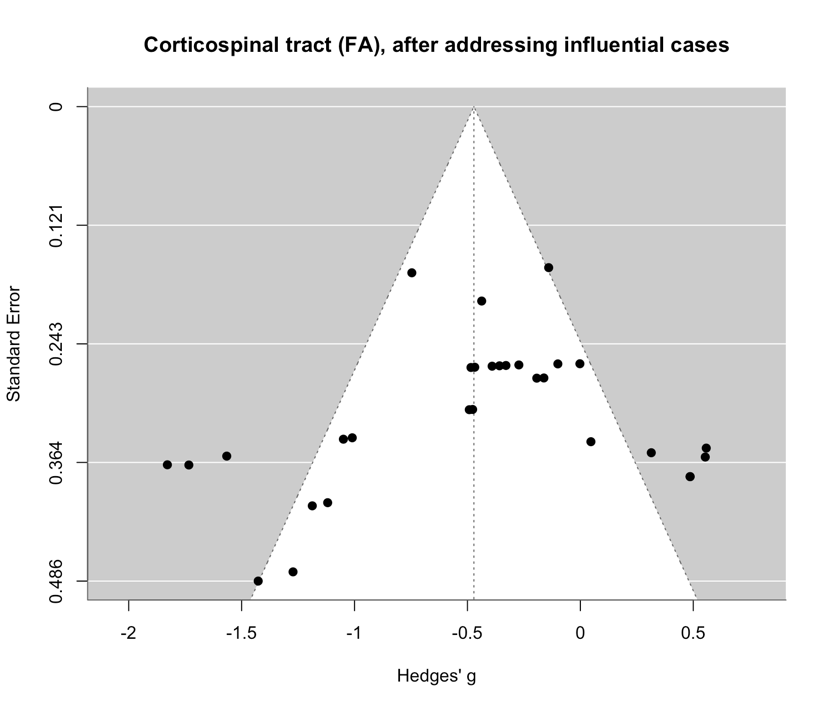

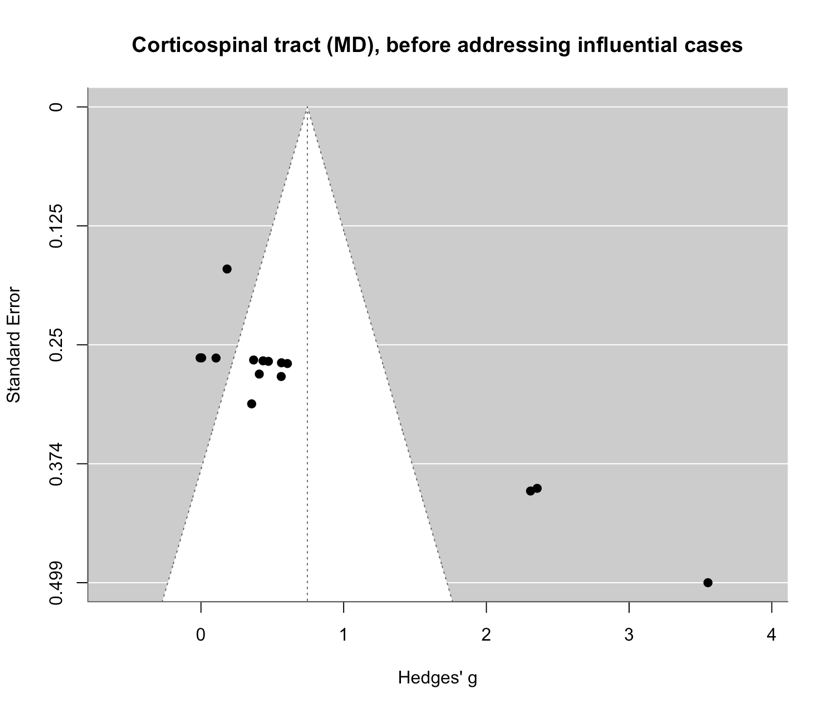

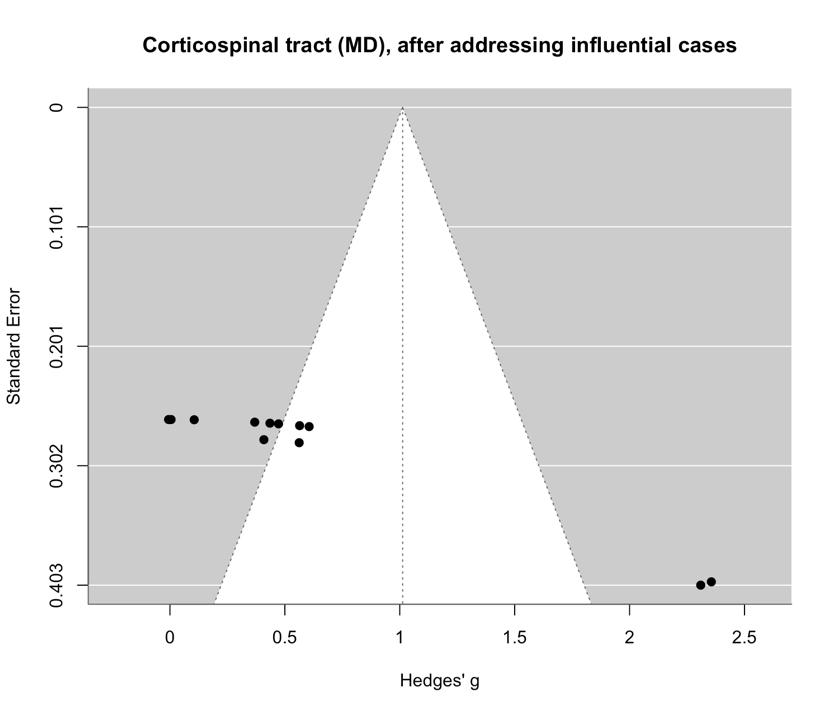


1. Internal capsule


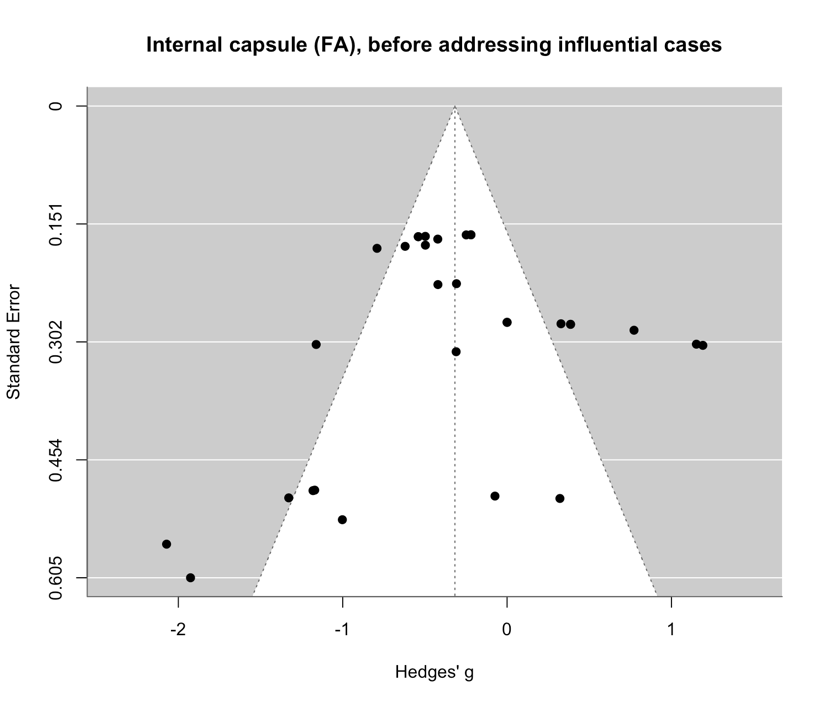

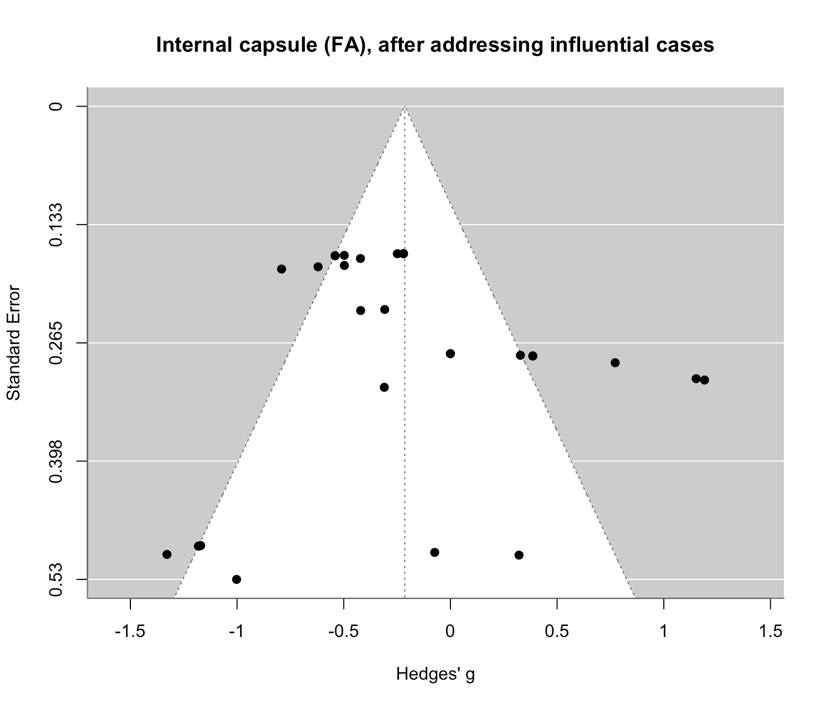

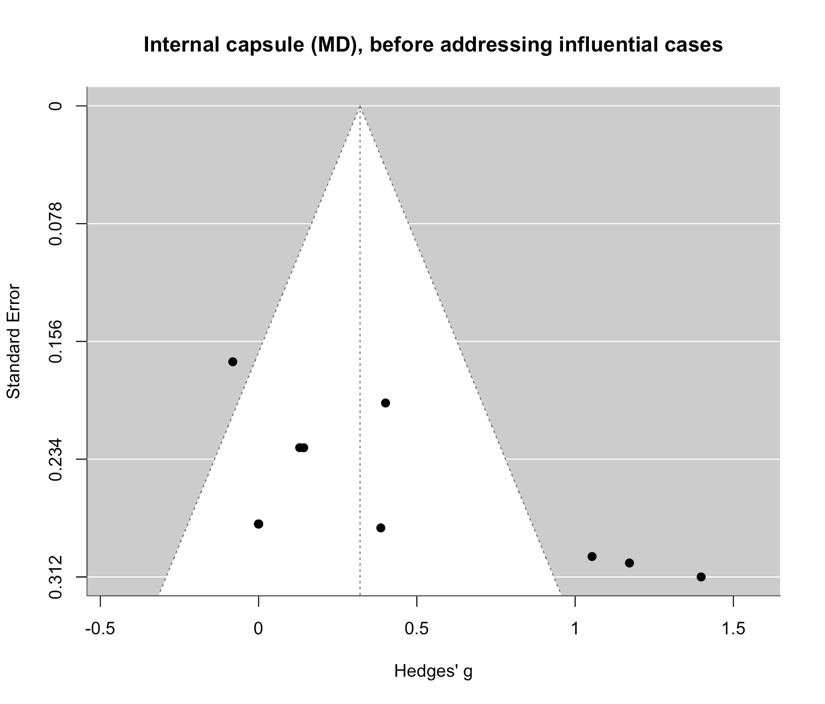

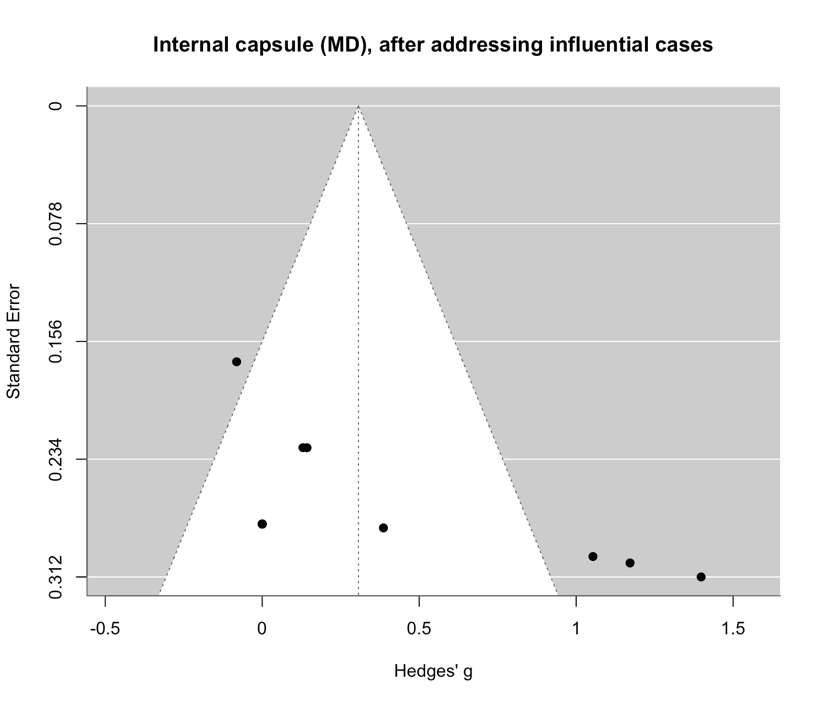


1. Thalamic radiation


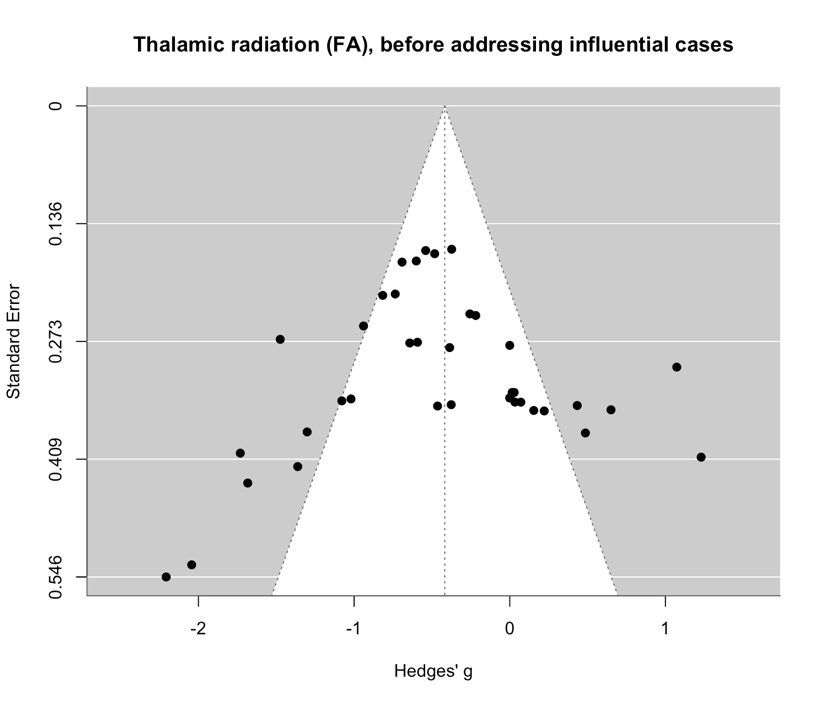

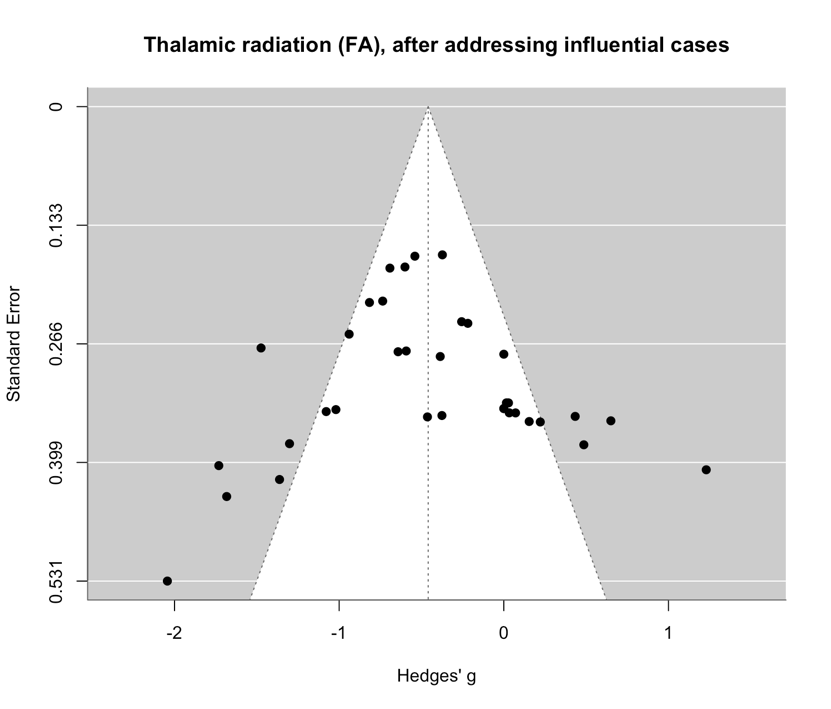

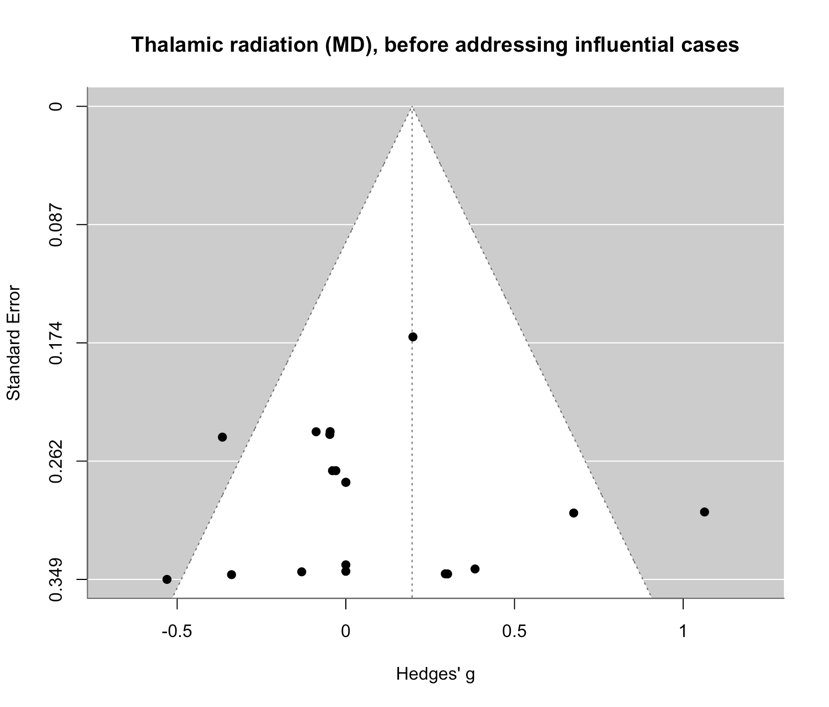

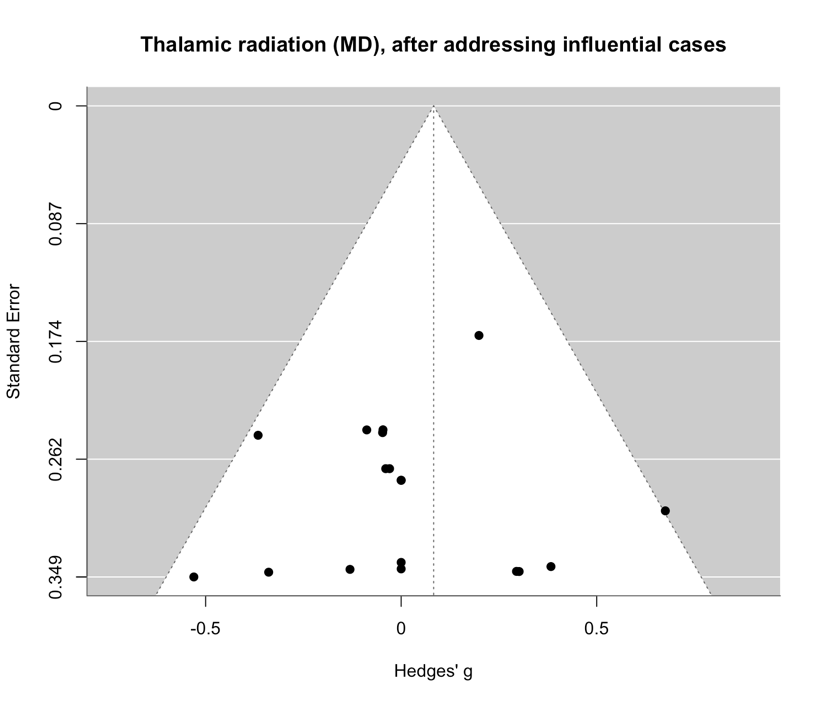


1. Arcuate fasciculus


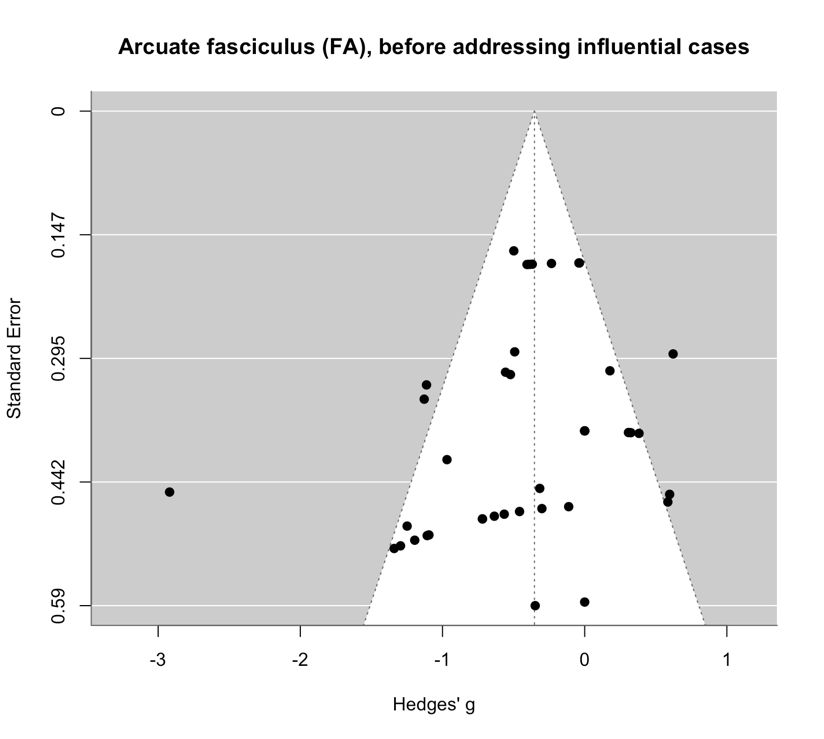

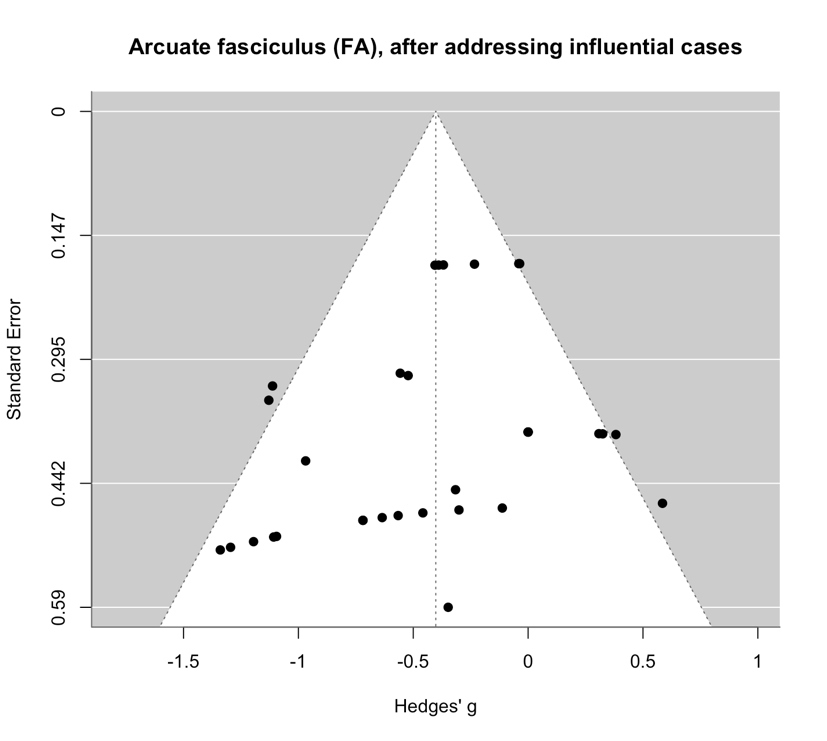

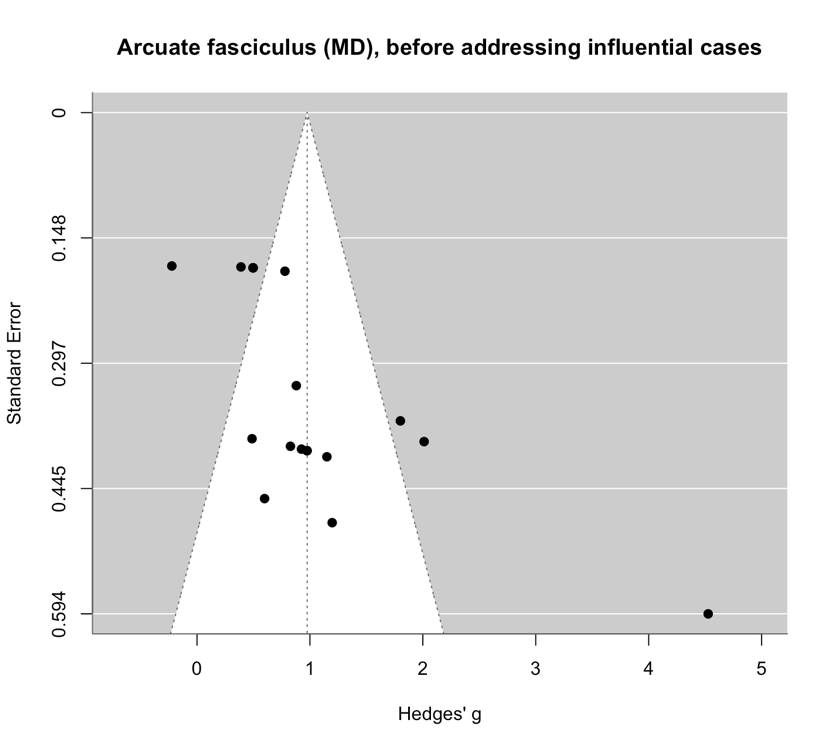

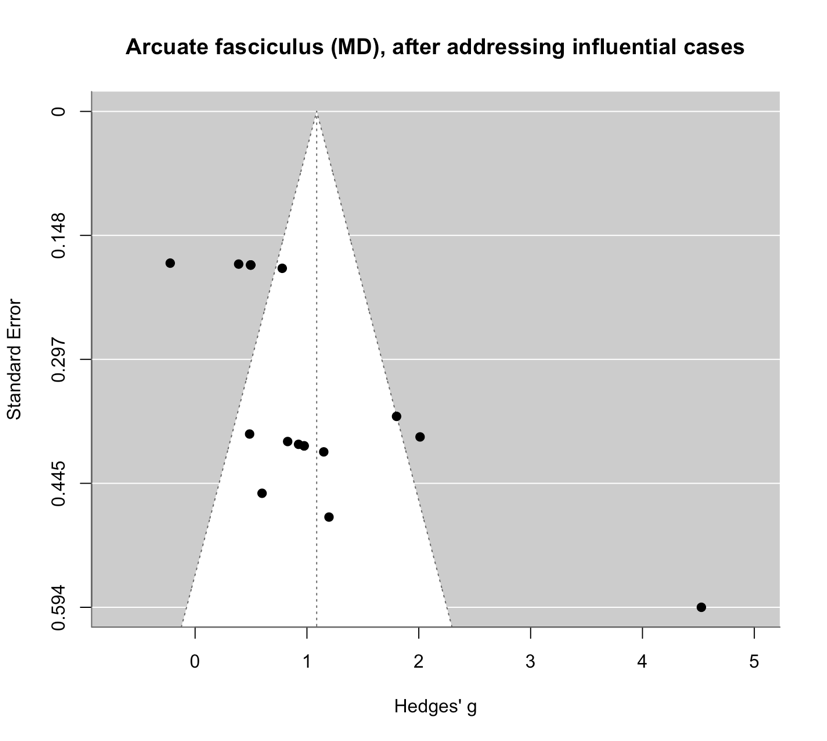


1. Inferior fronto-occipital fasciculus


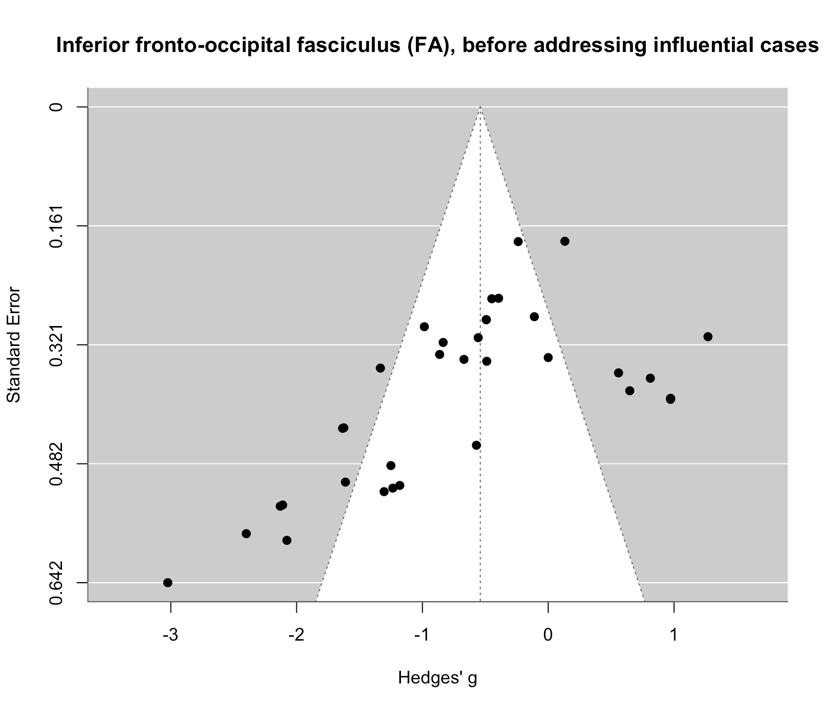

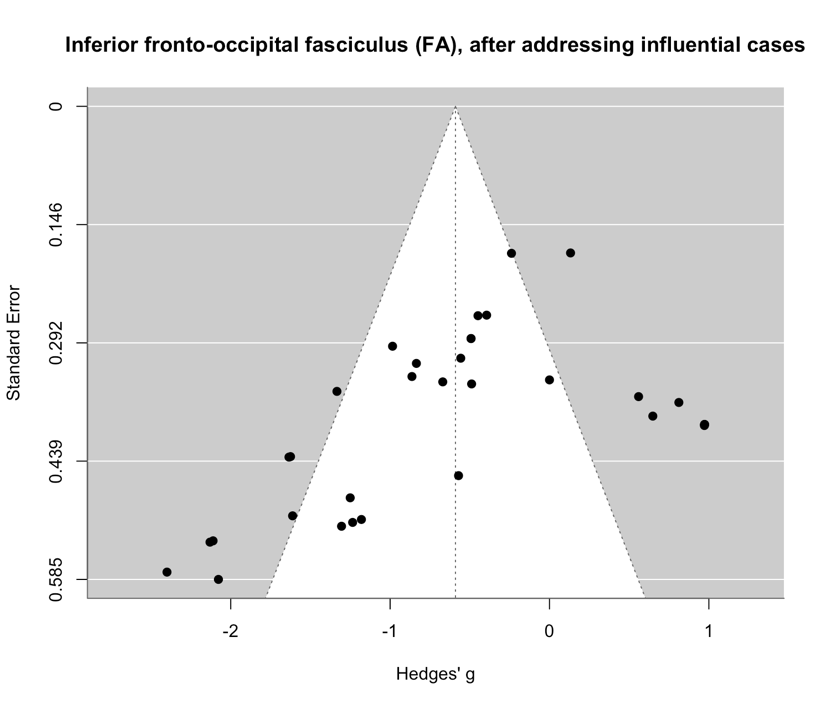


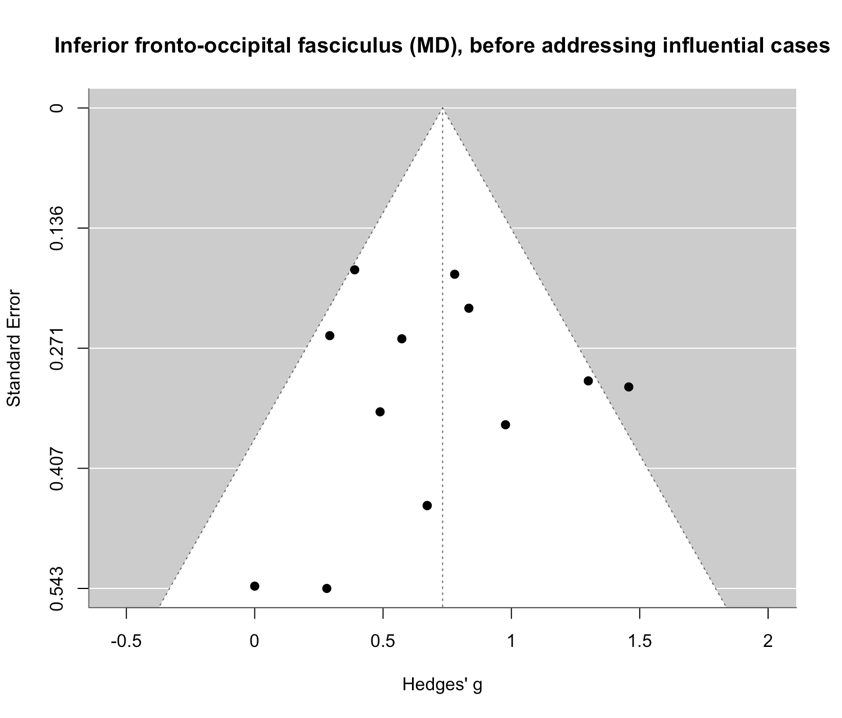


1. Inferior longitudinal fasciculus


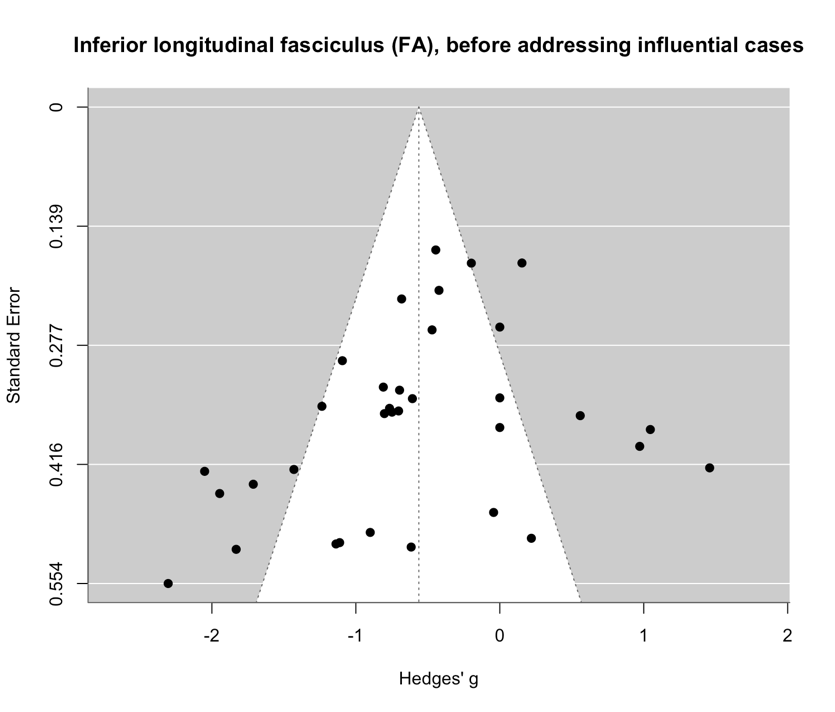

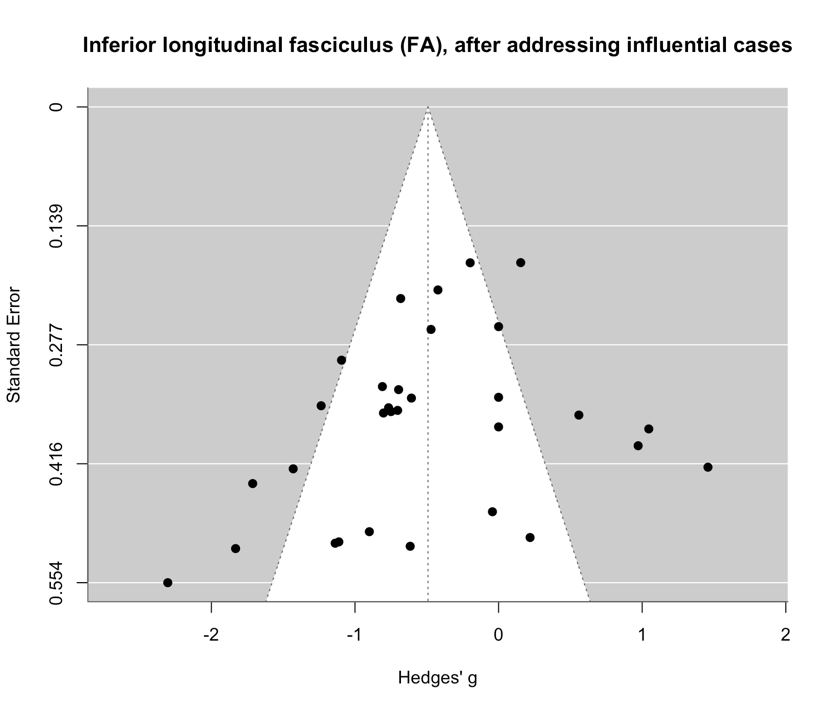

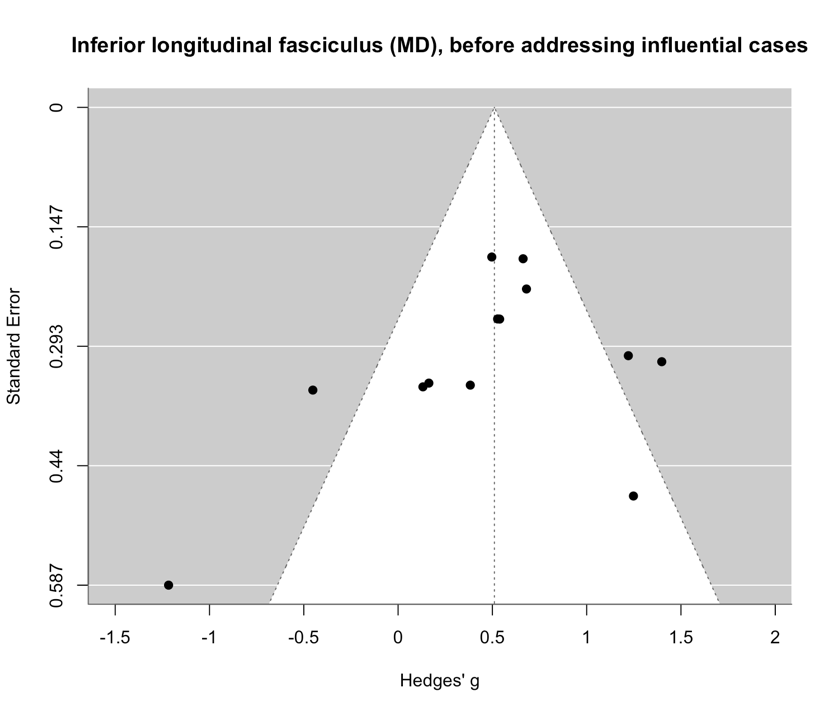

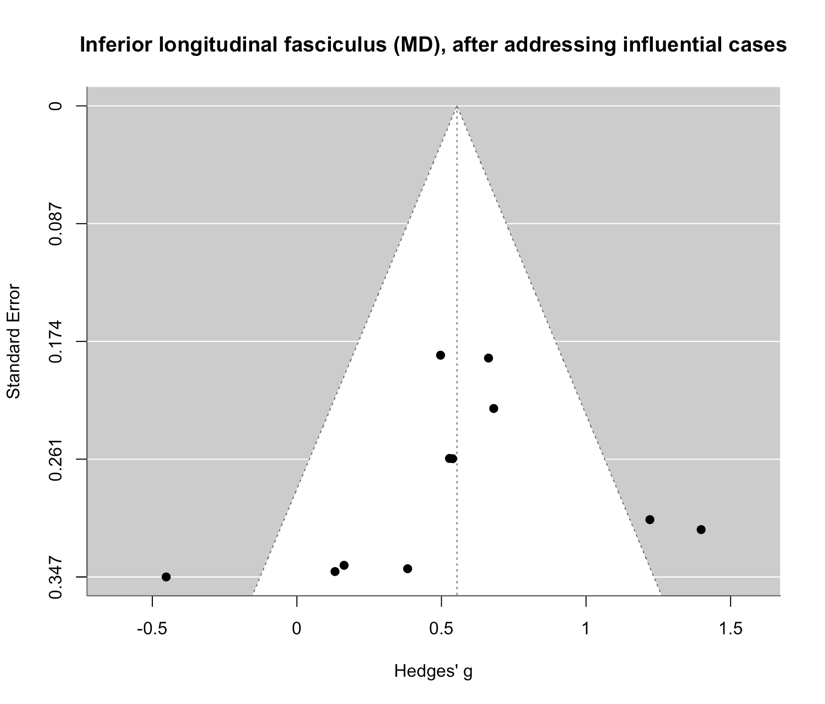


1. Superior longitudinal fasciculus


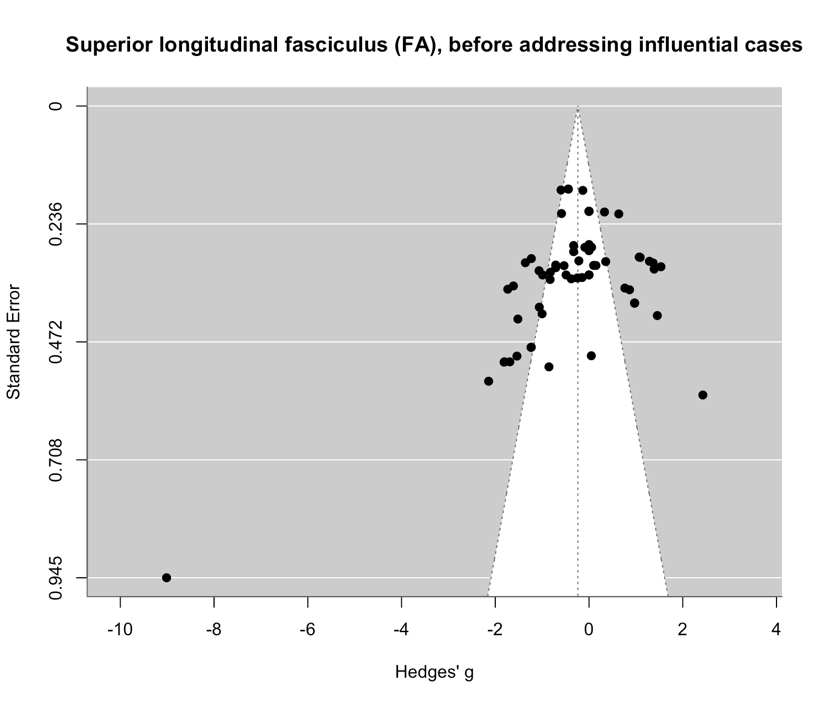

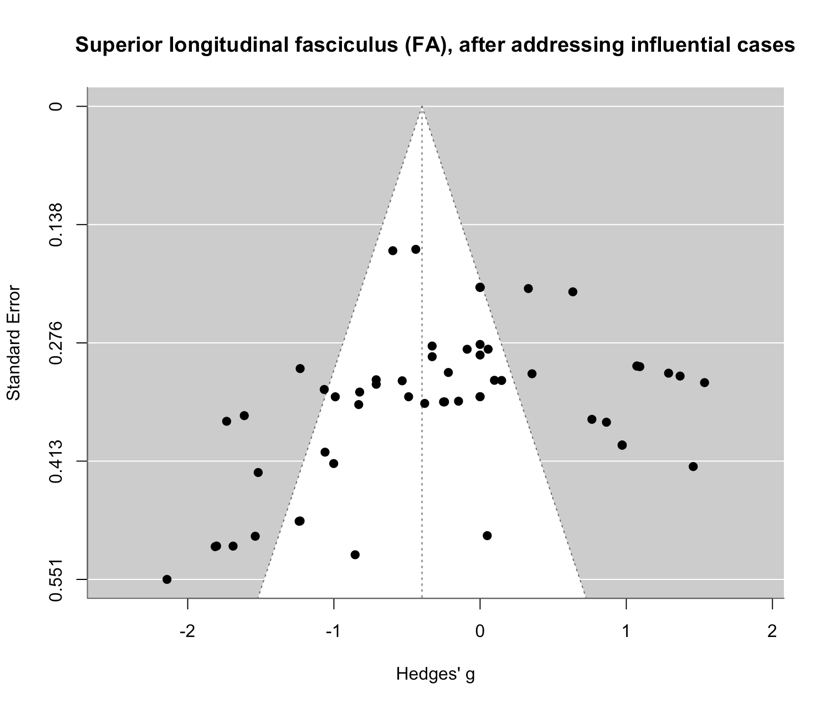

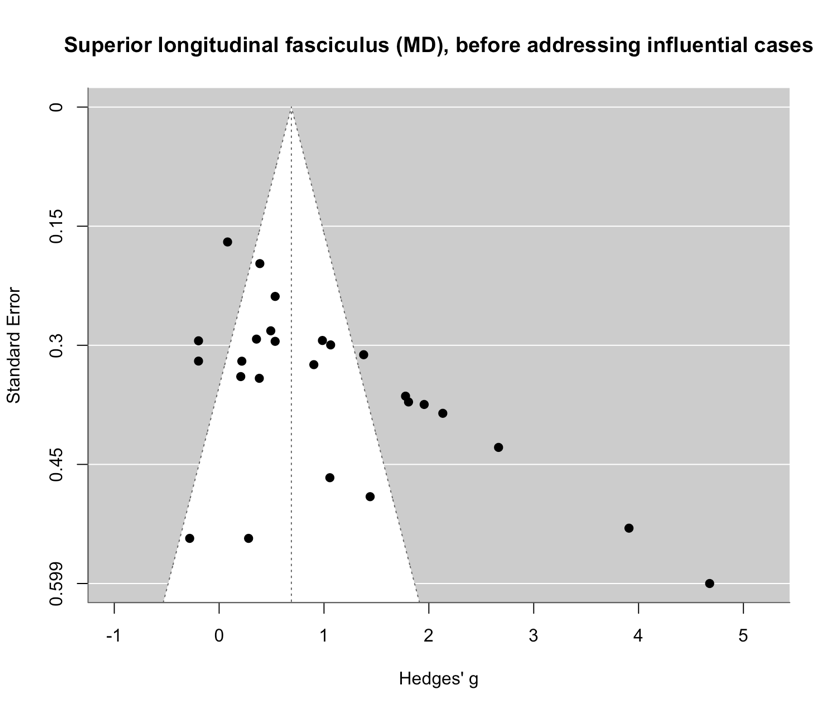

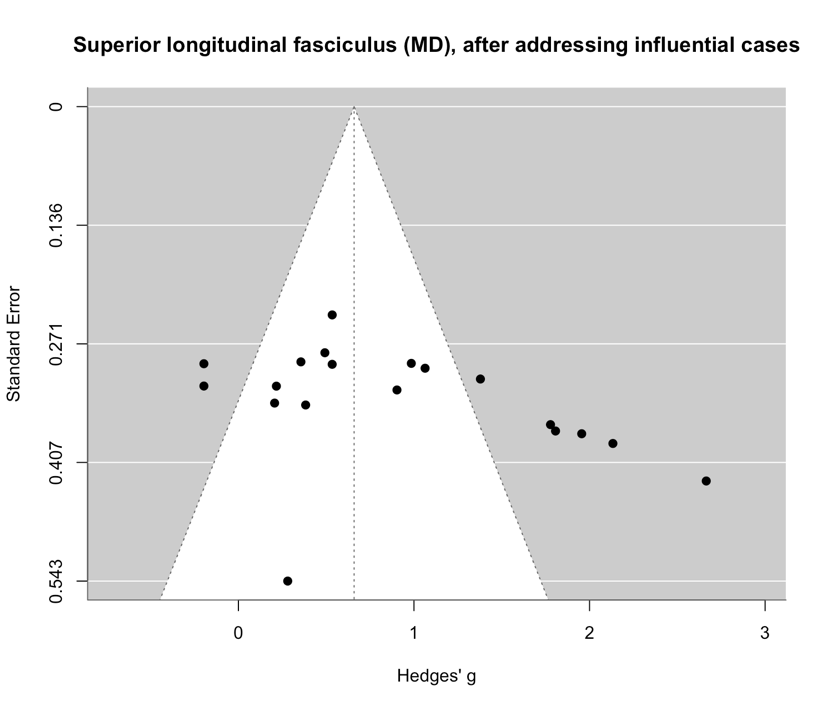


1. Uncinate fasciculus


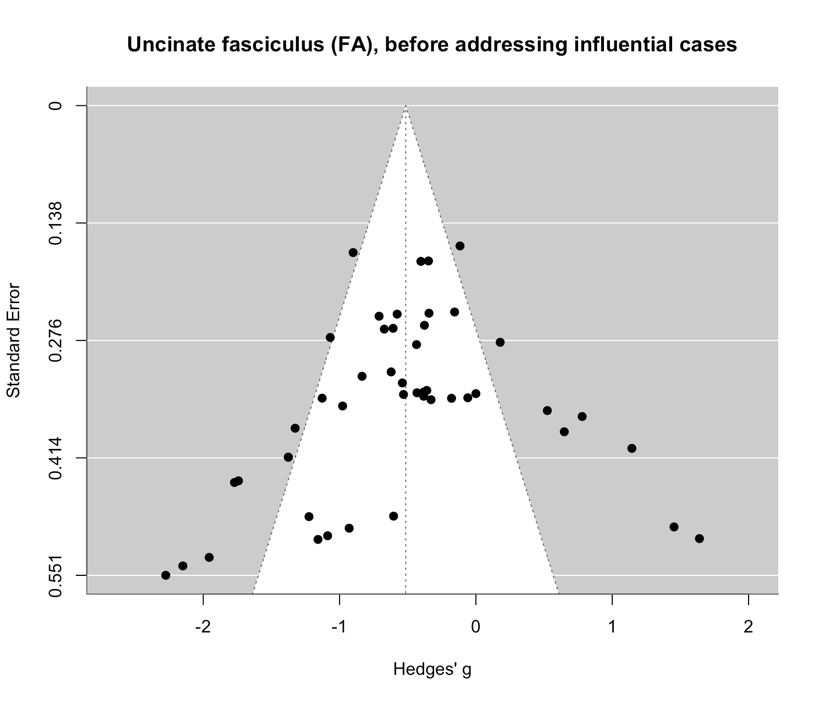

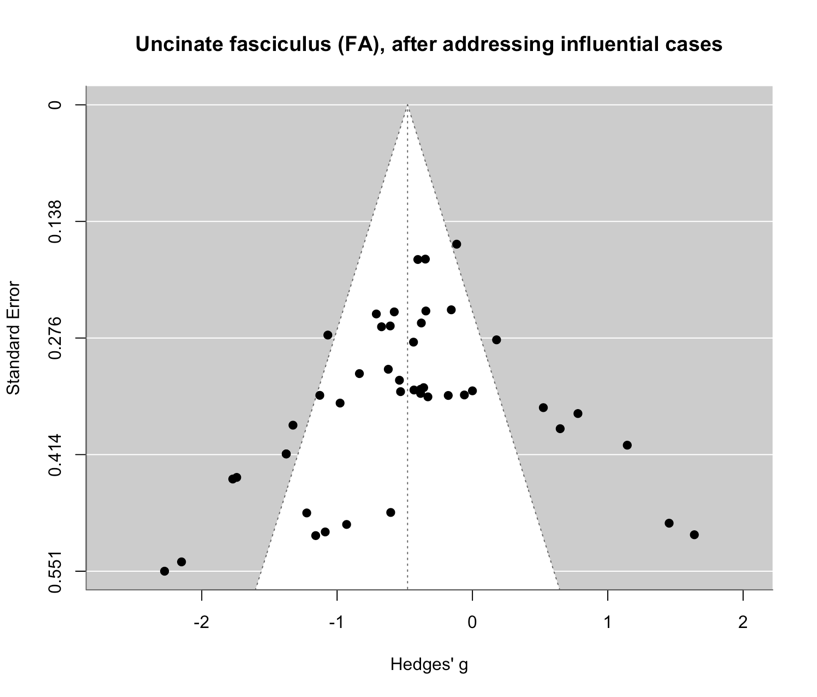

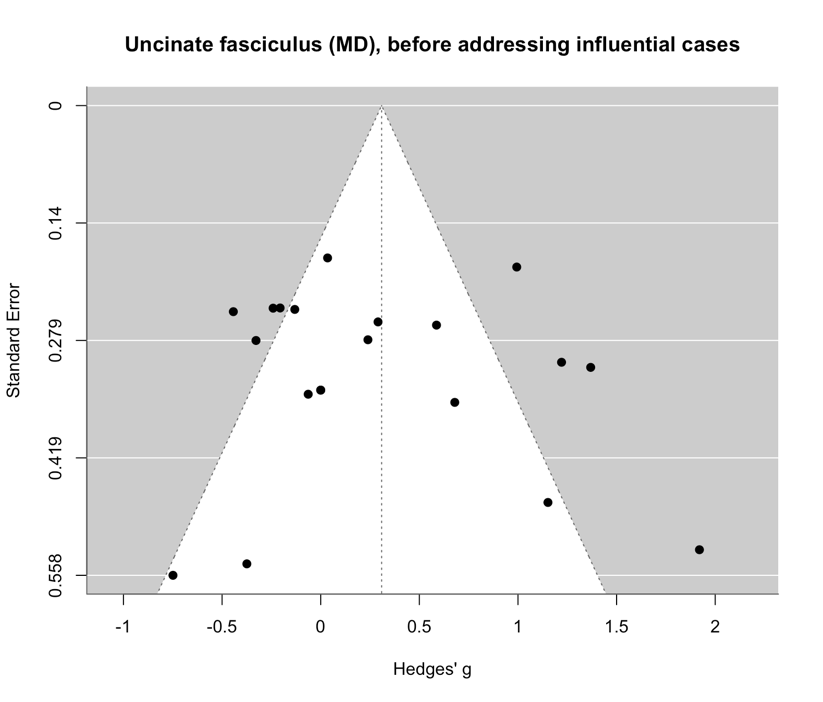

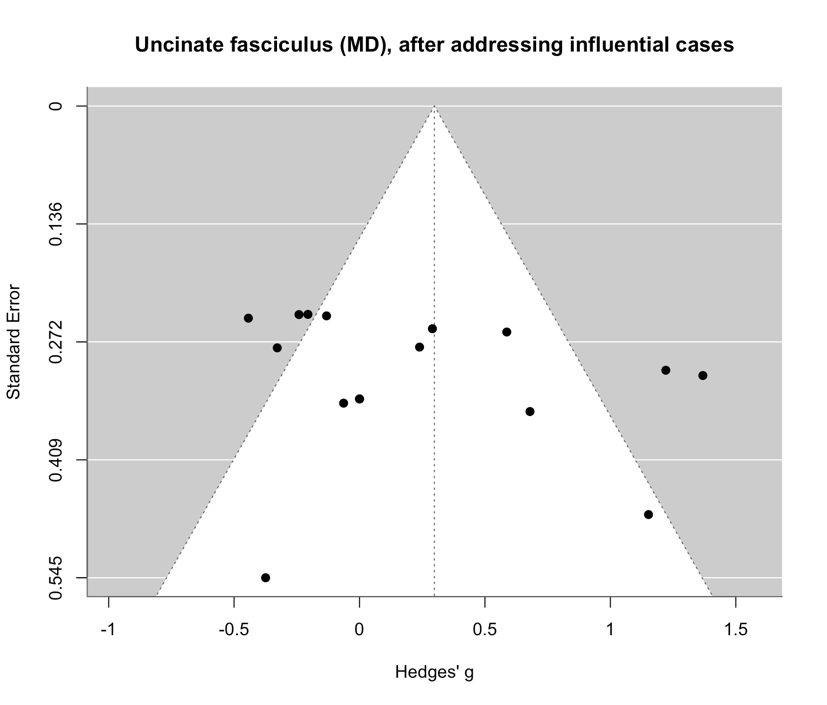


**Figure S3.** Cook’s distance for effect sizes contributing to 11 white matter tracts, with data points (i.e., effect sizes) marked by author and publication year to highlight outliers.

1. Corpus callosum


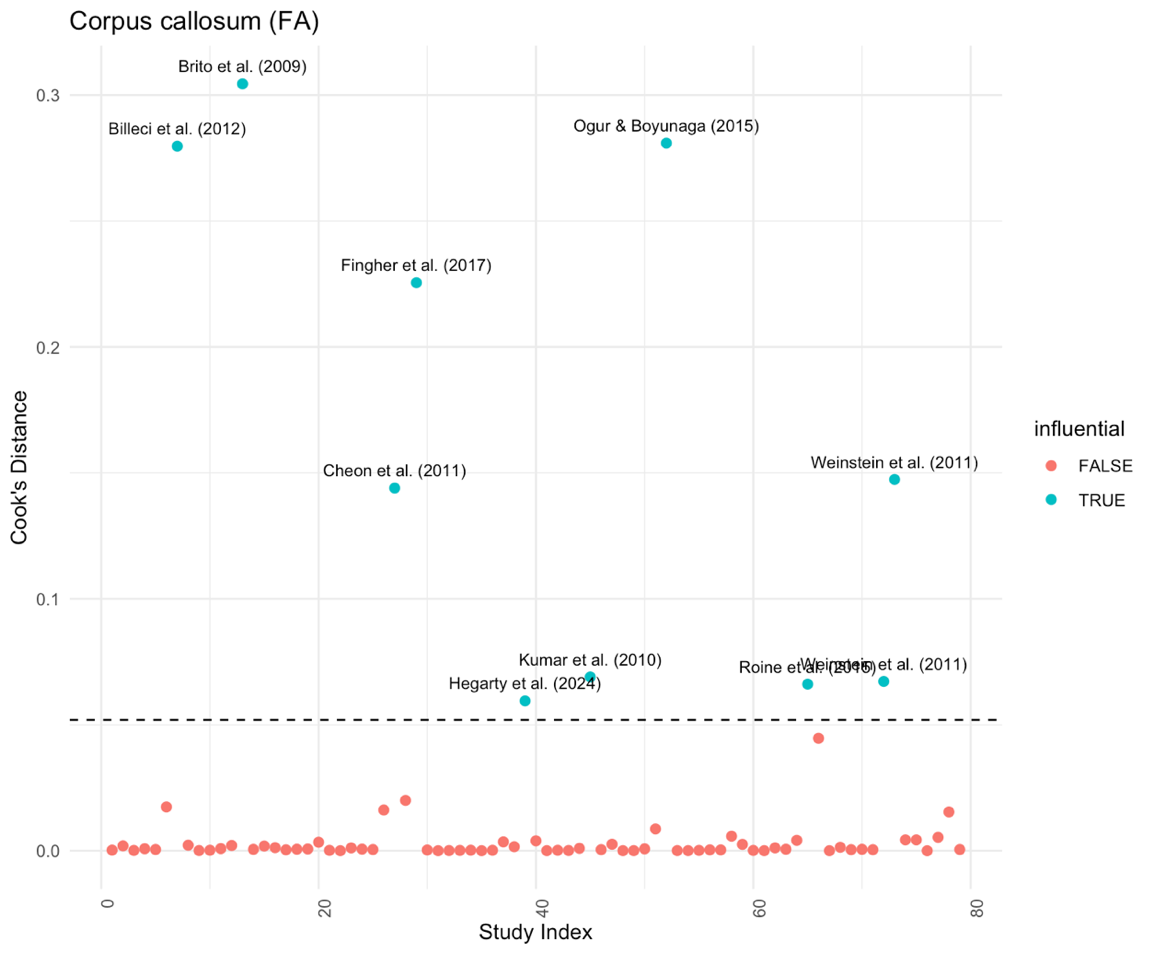


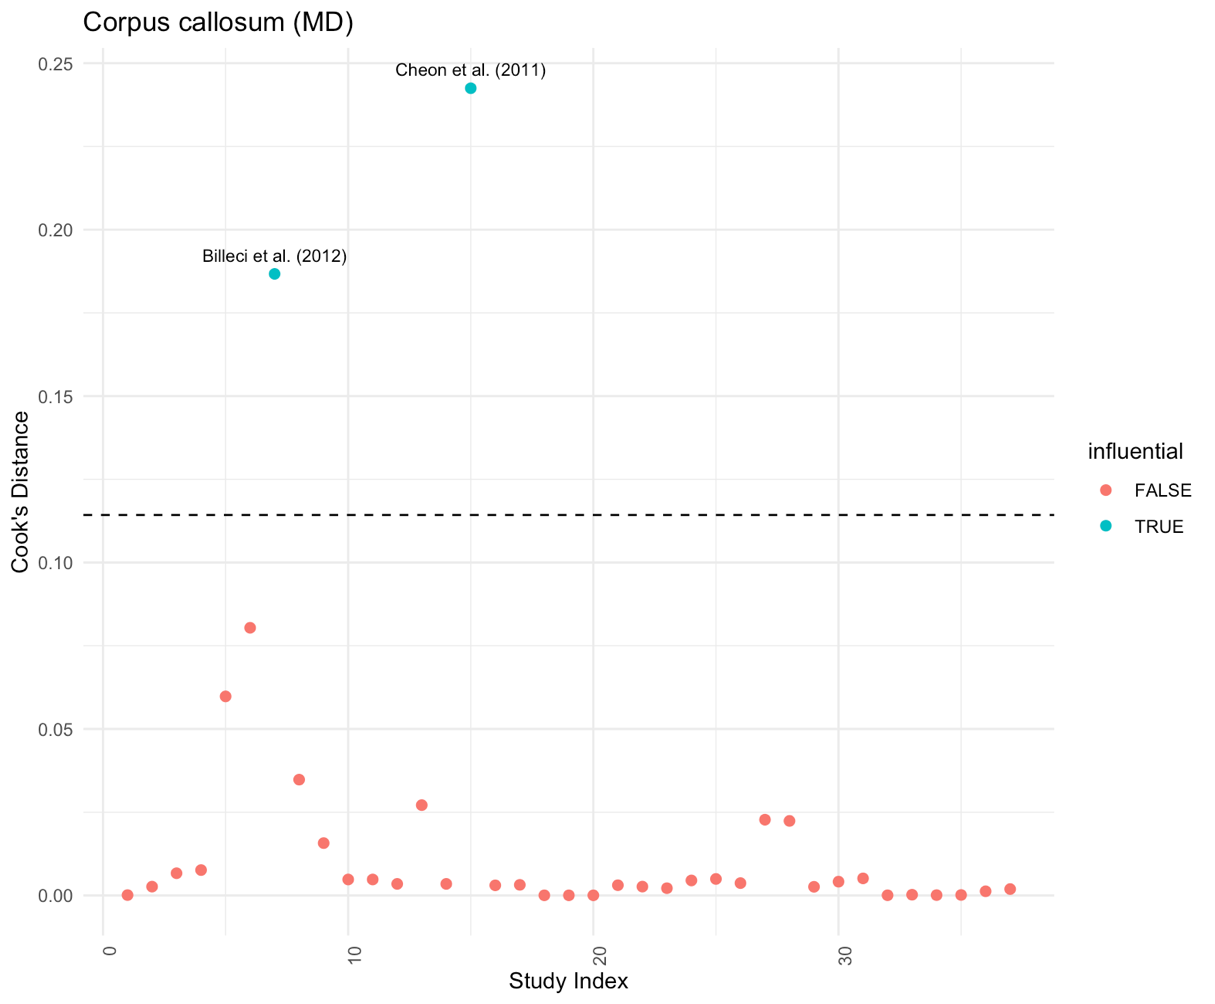


1. Cerebellar peduncles


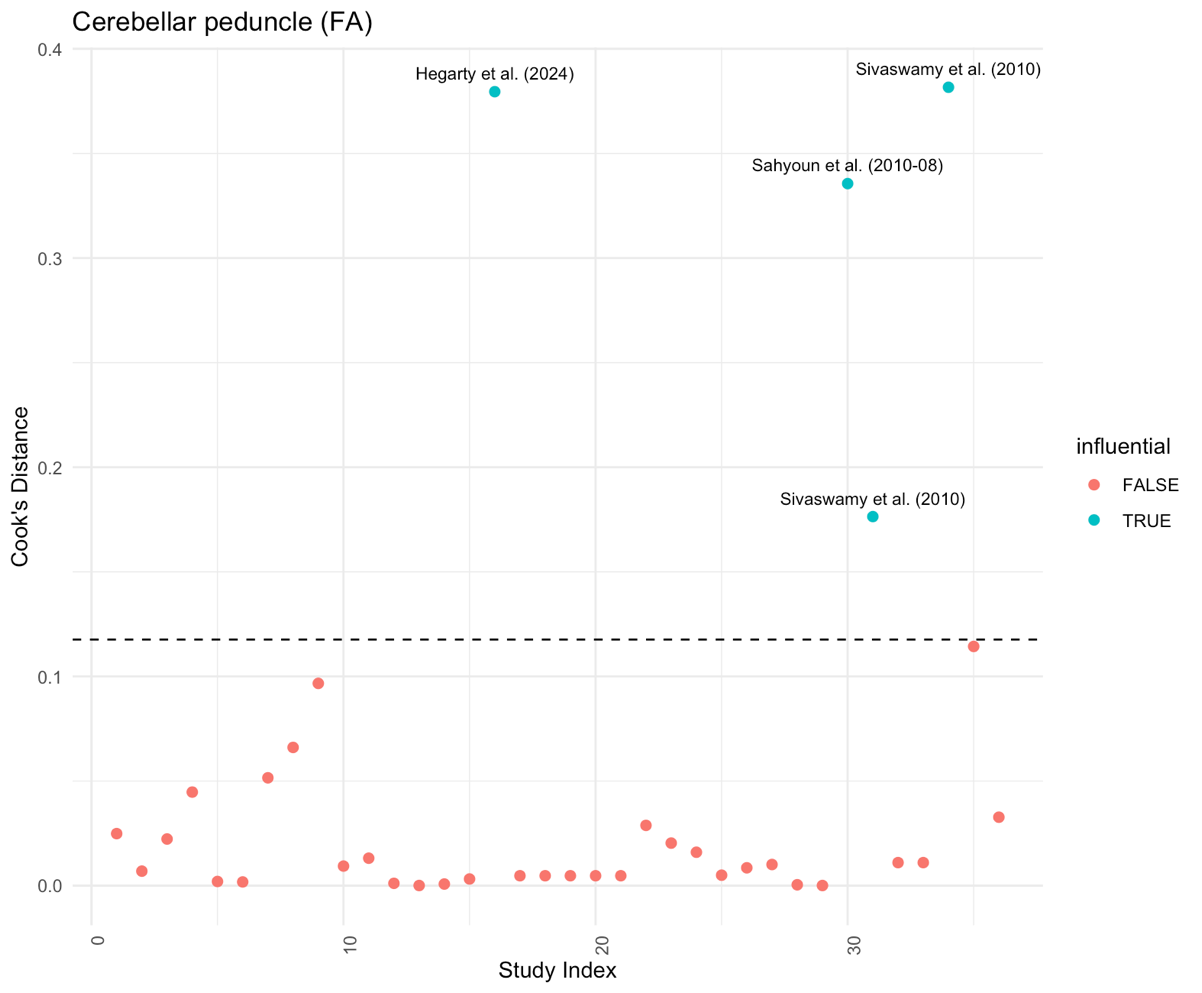


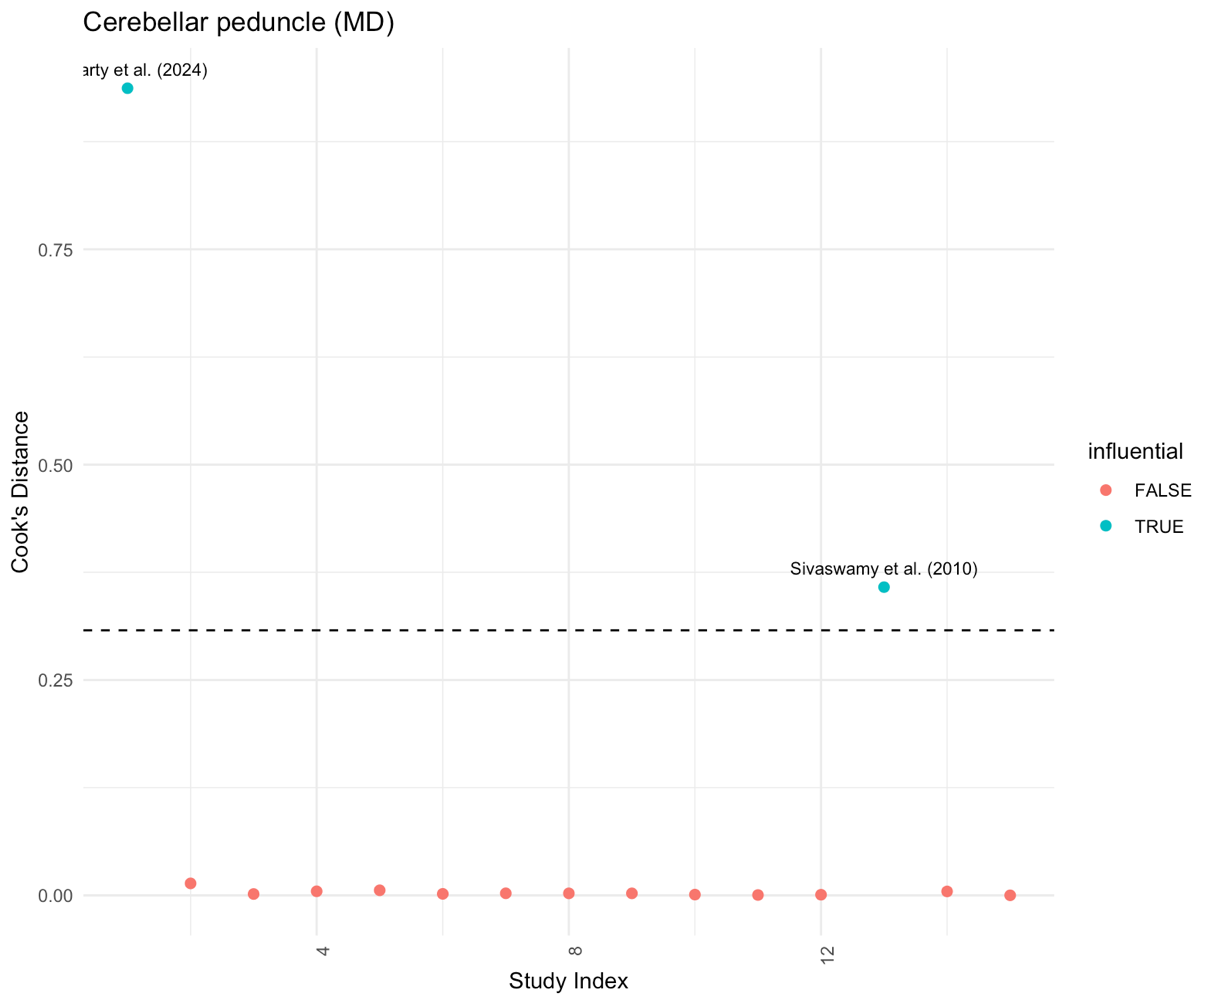


1. Corona radiata


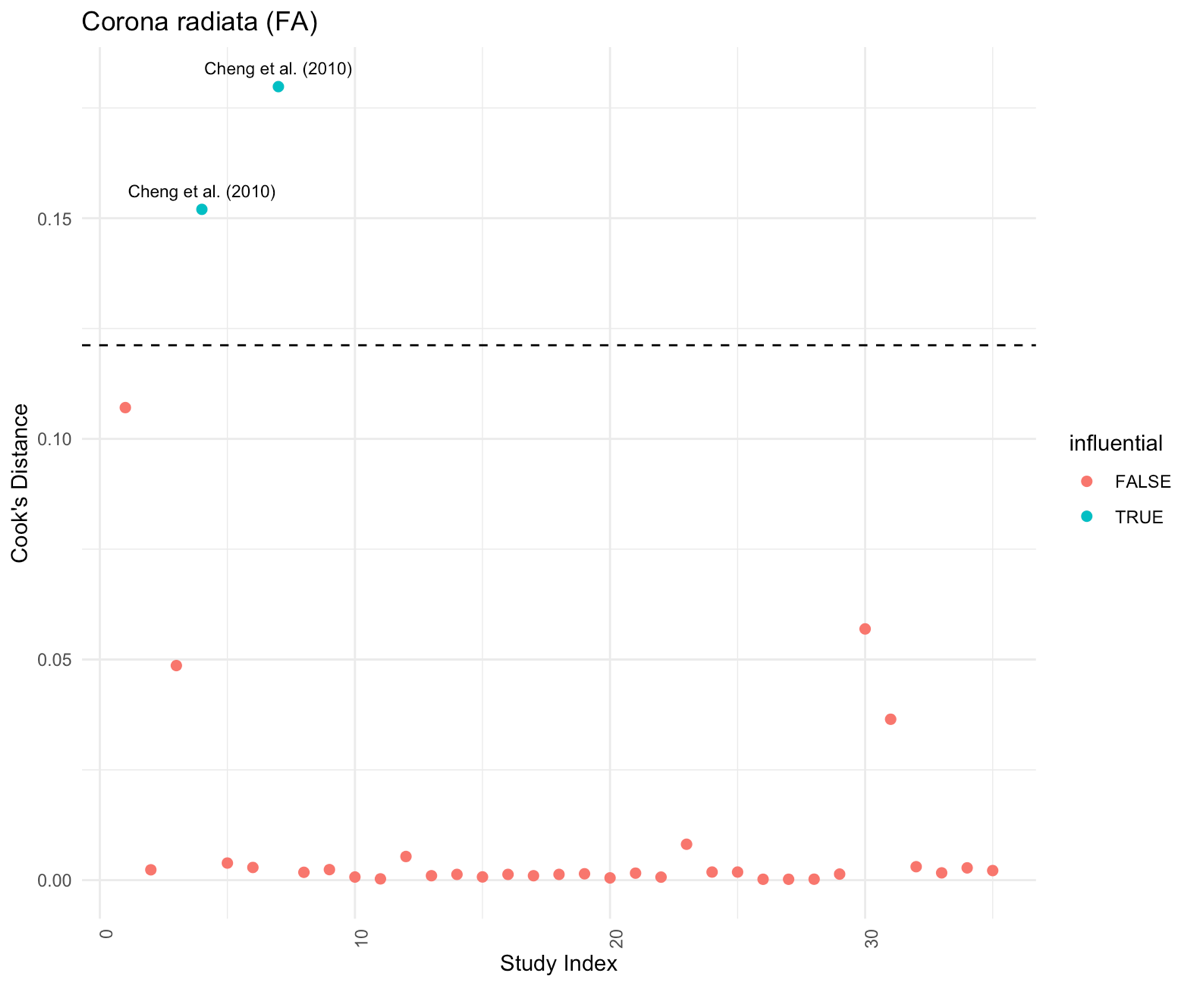


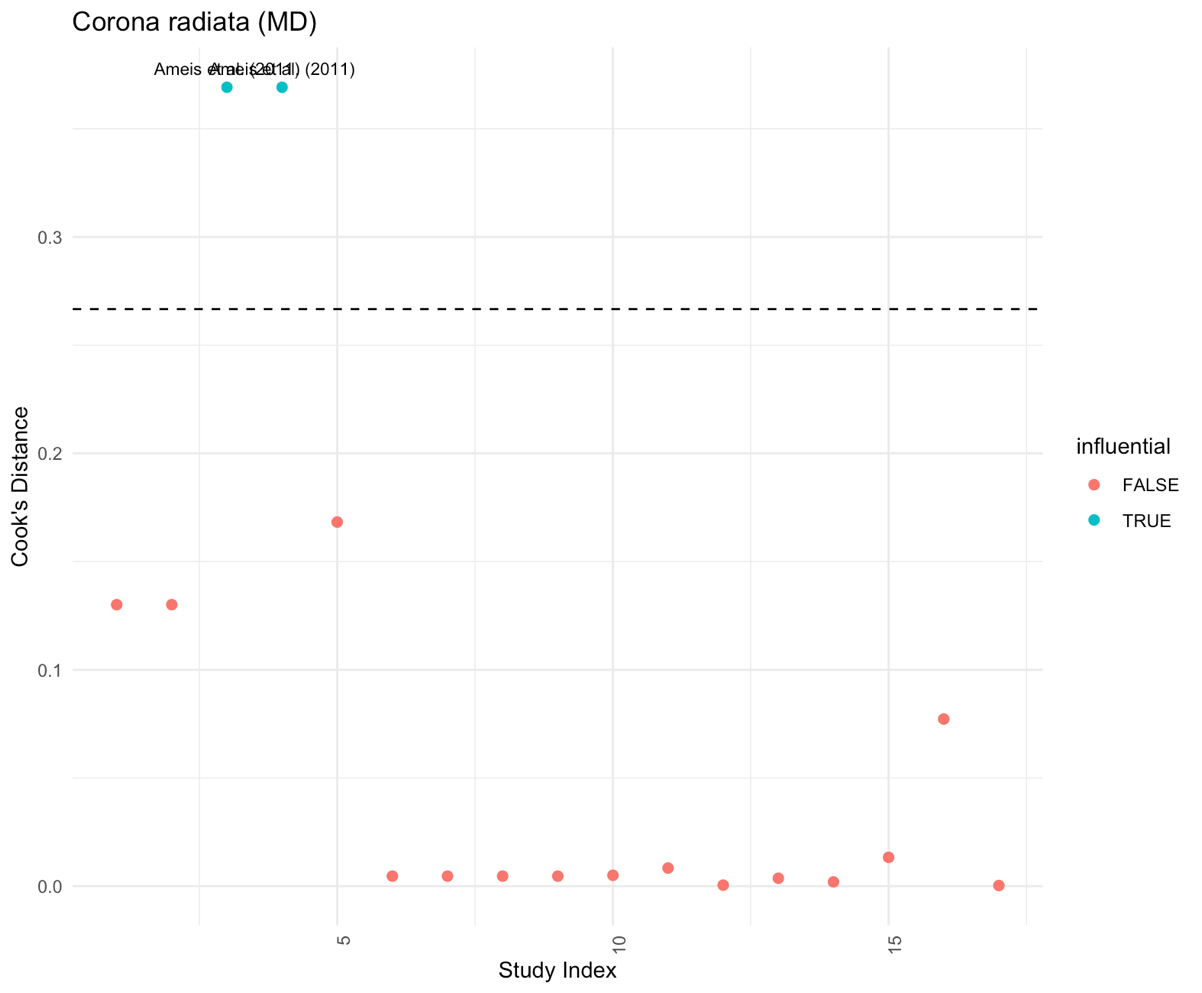


1. Corticospinal tract


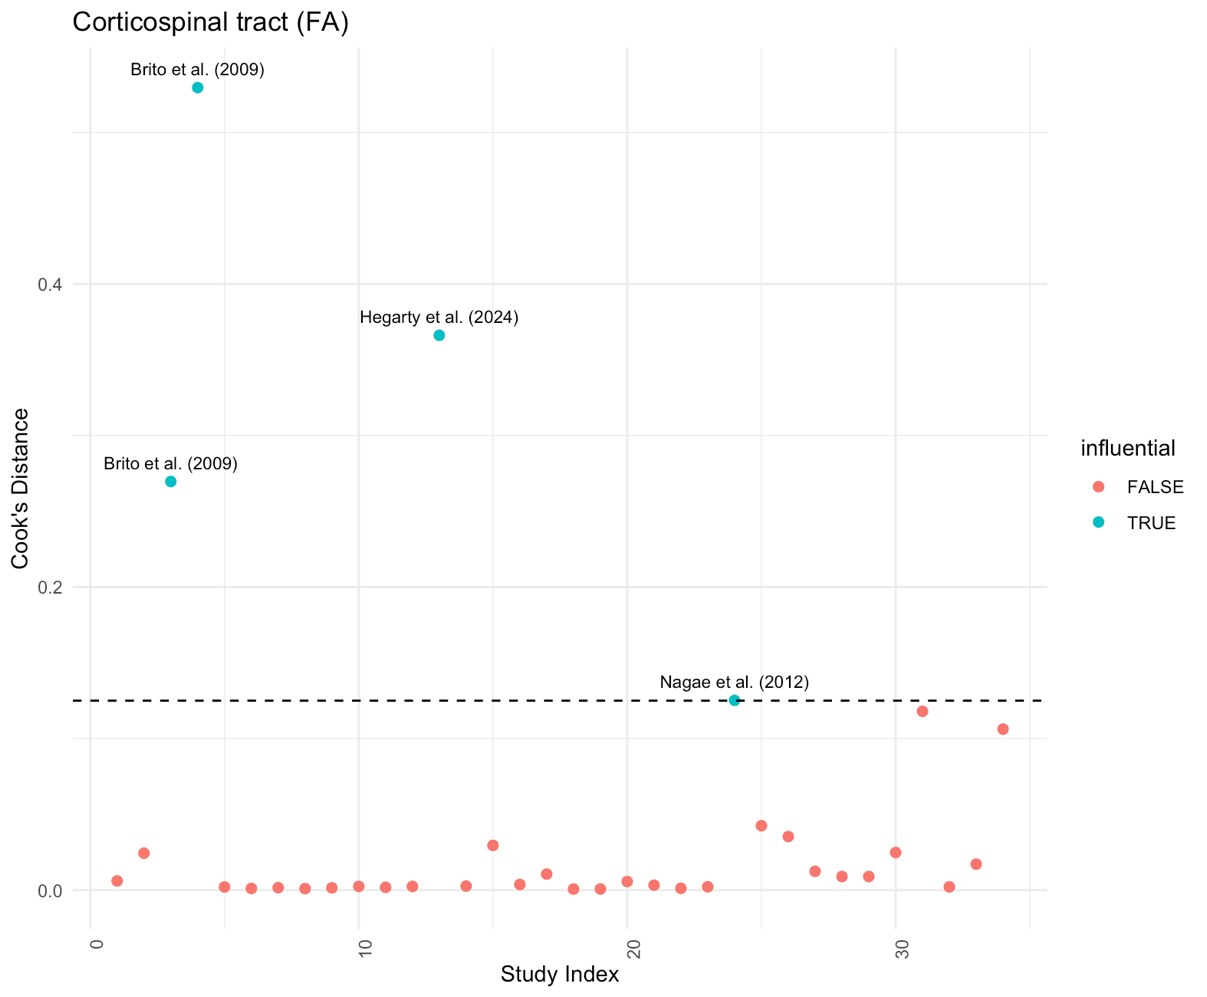


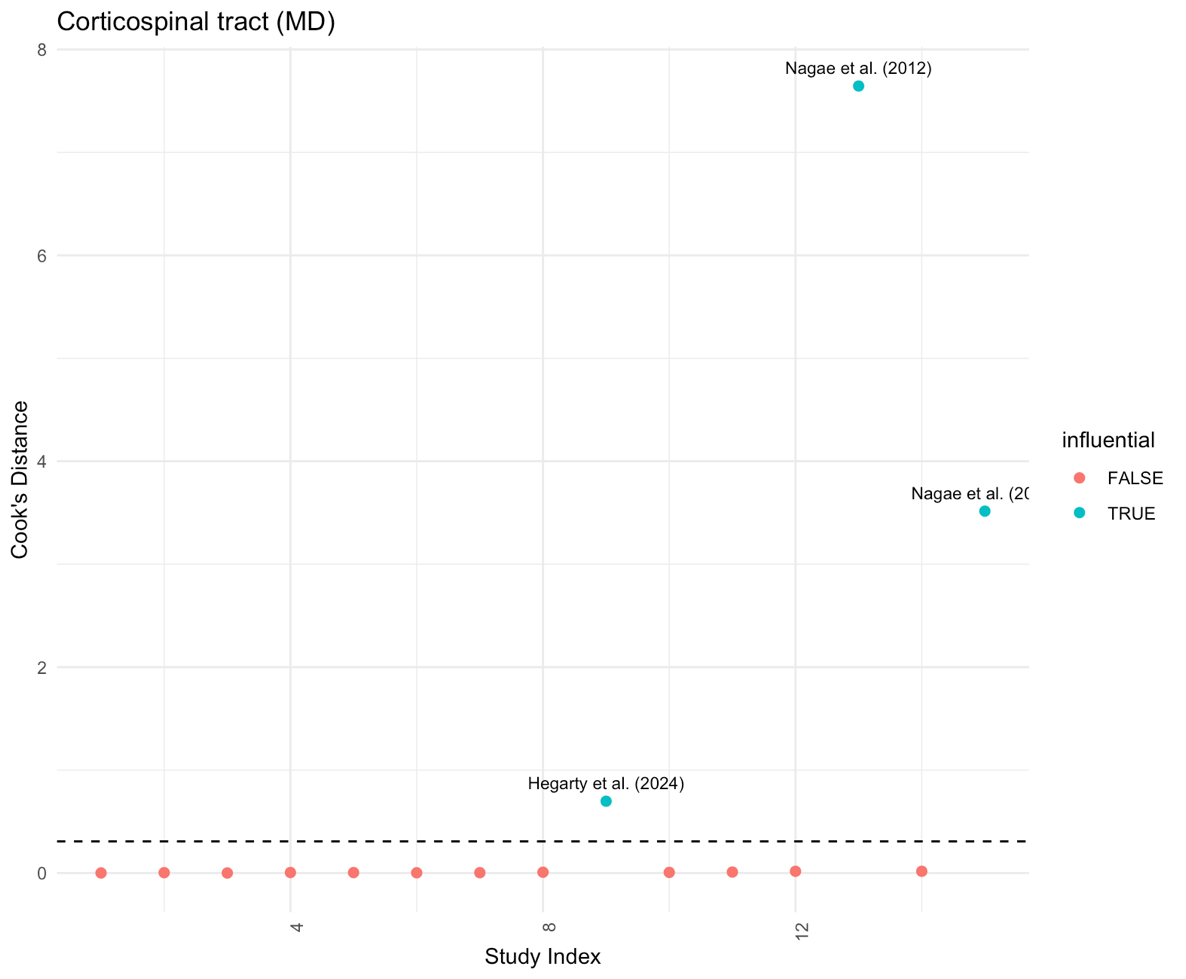


1. Internal capsule


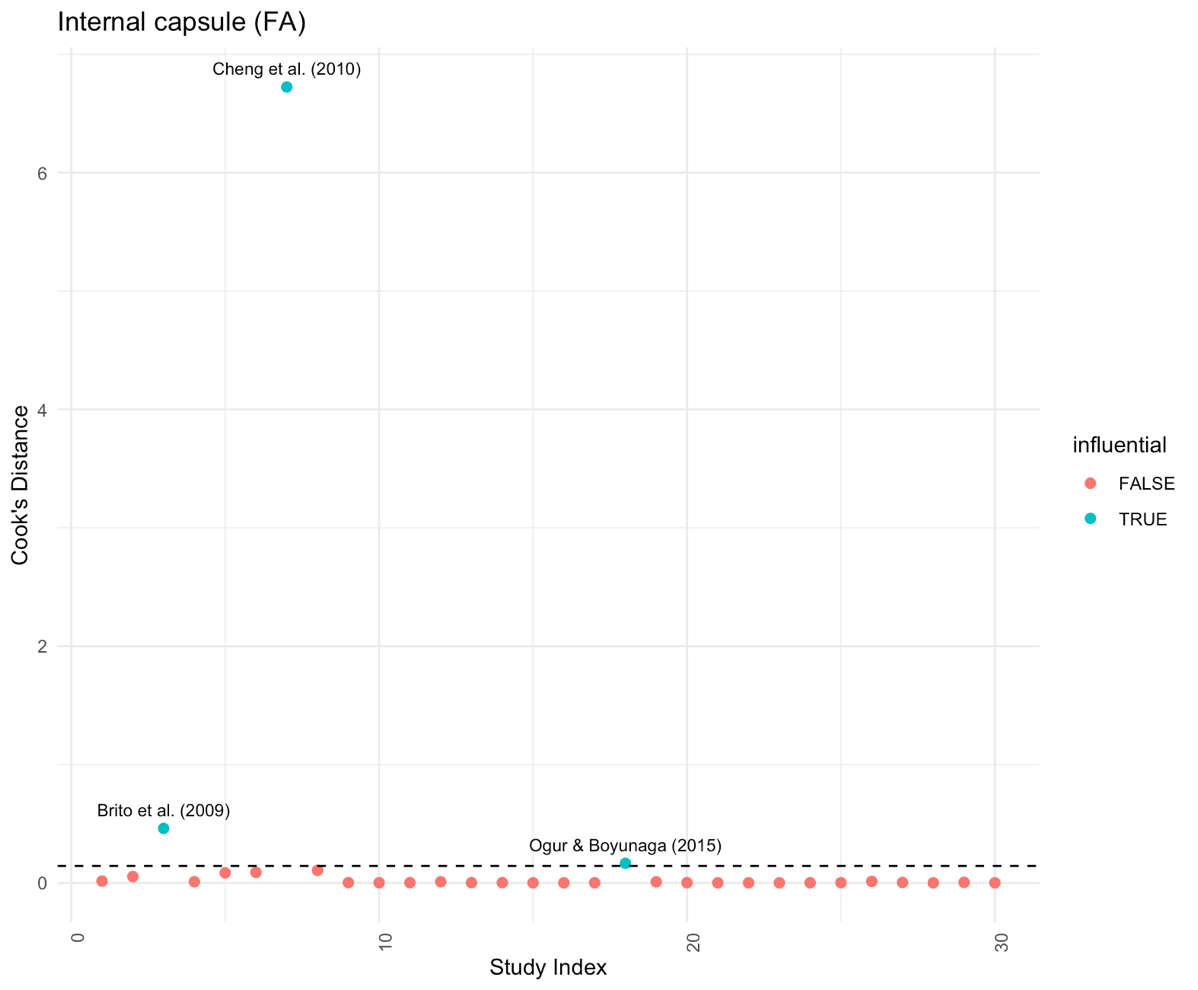


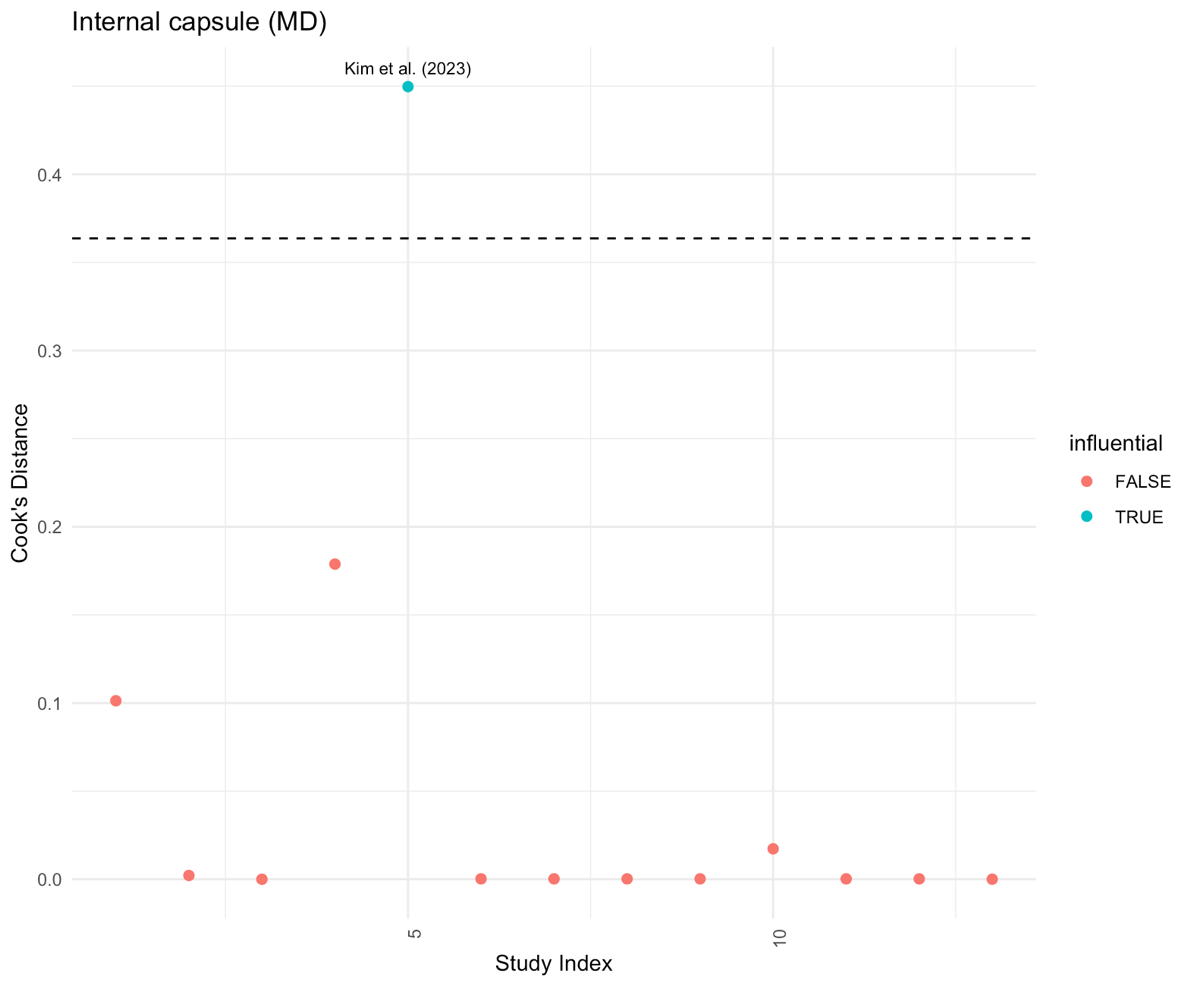


1. Thalamic radiation


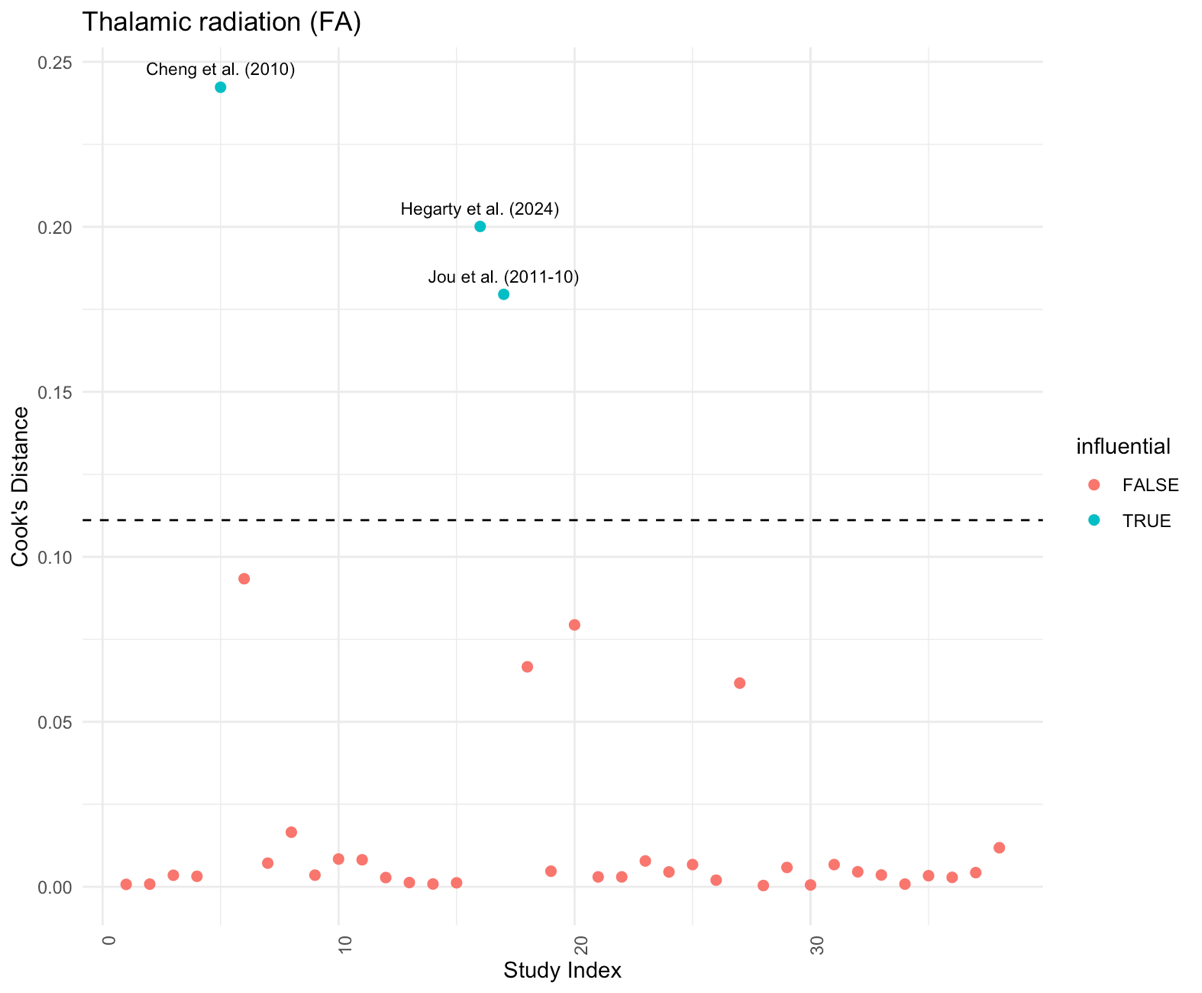


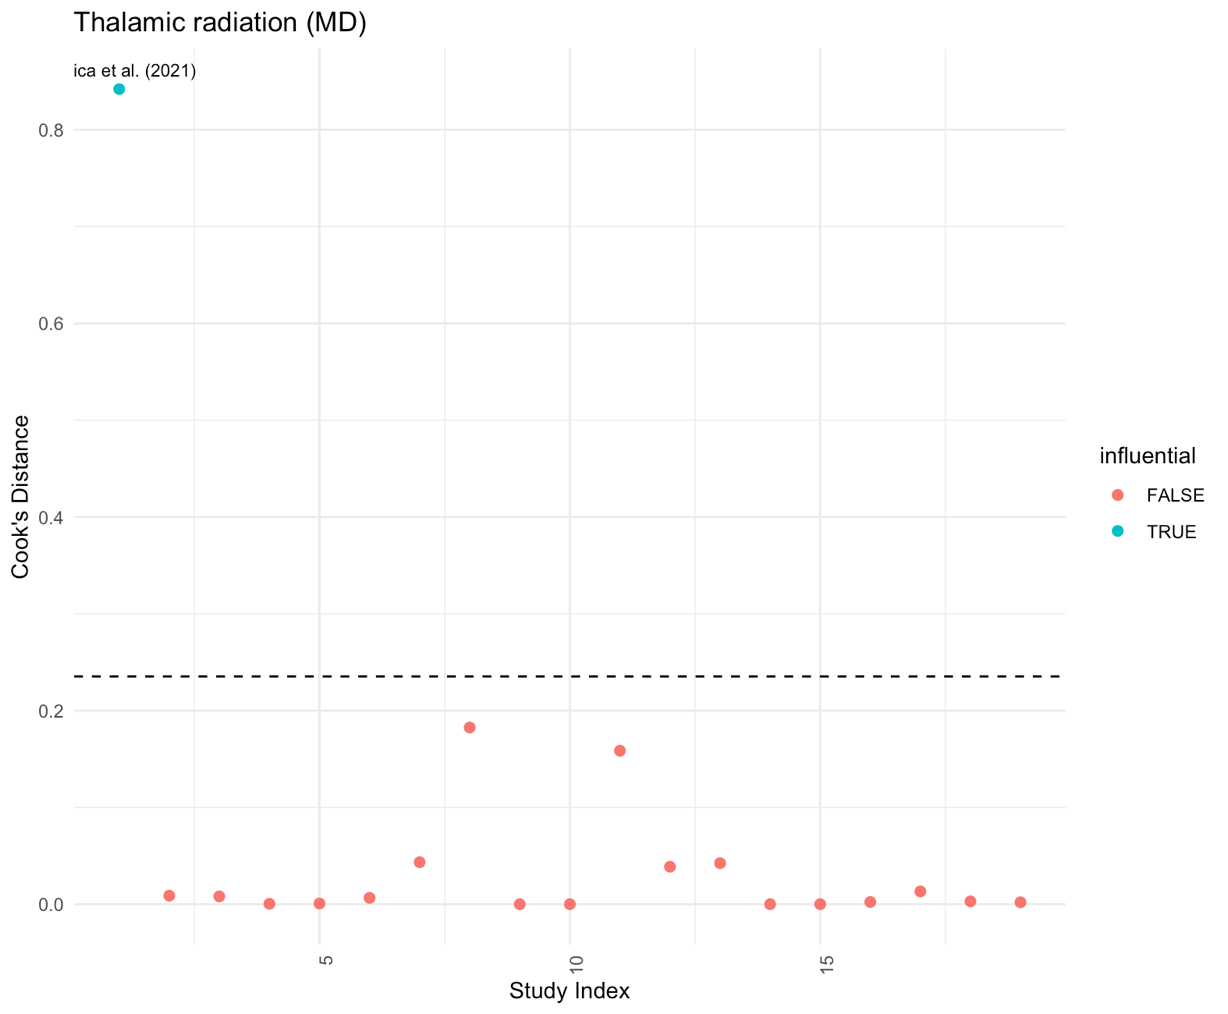


1. Arcuate fasciculus


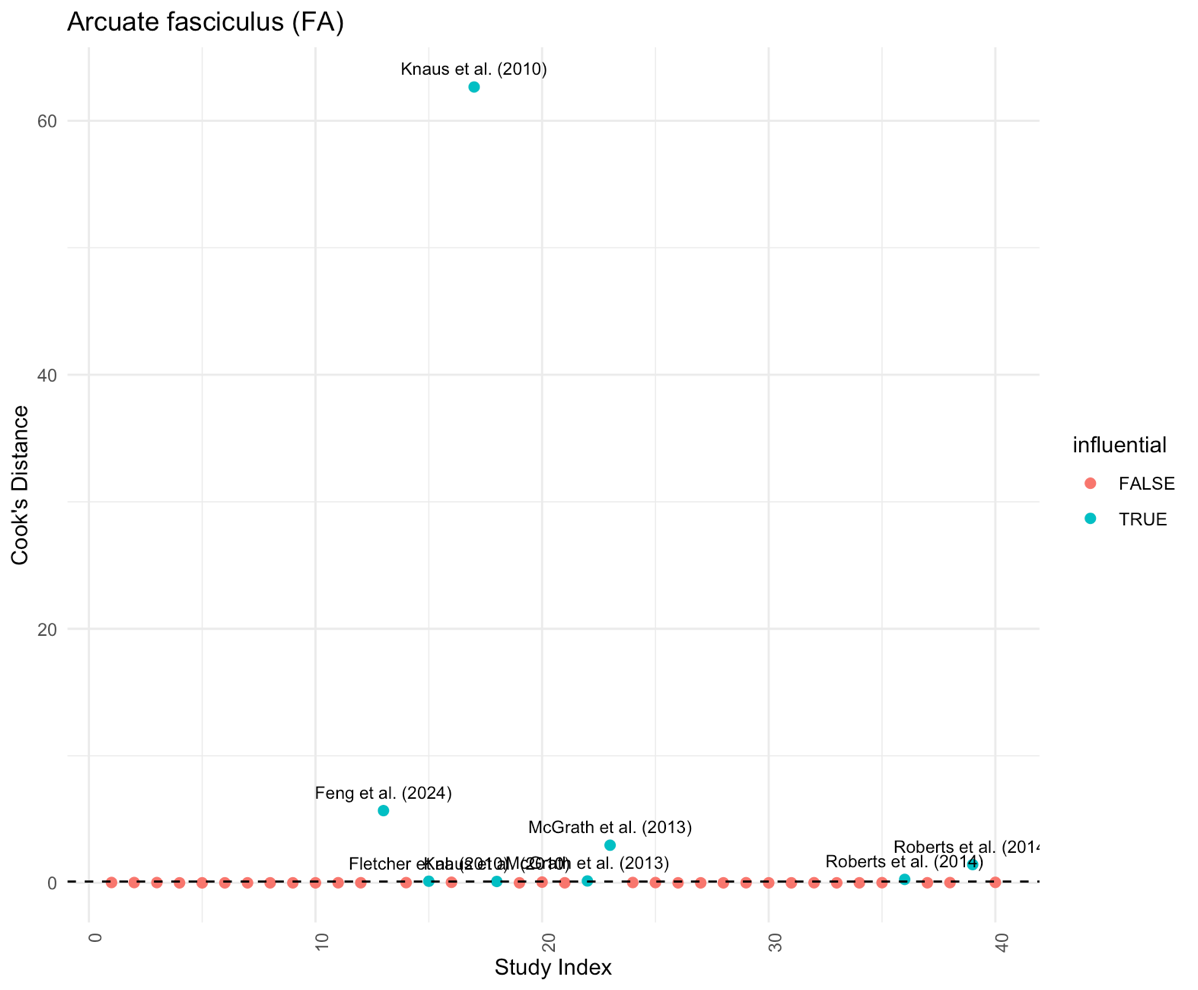


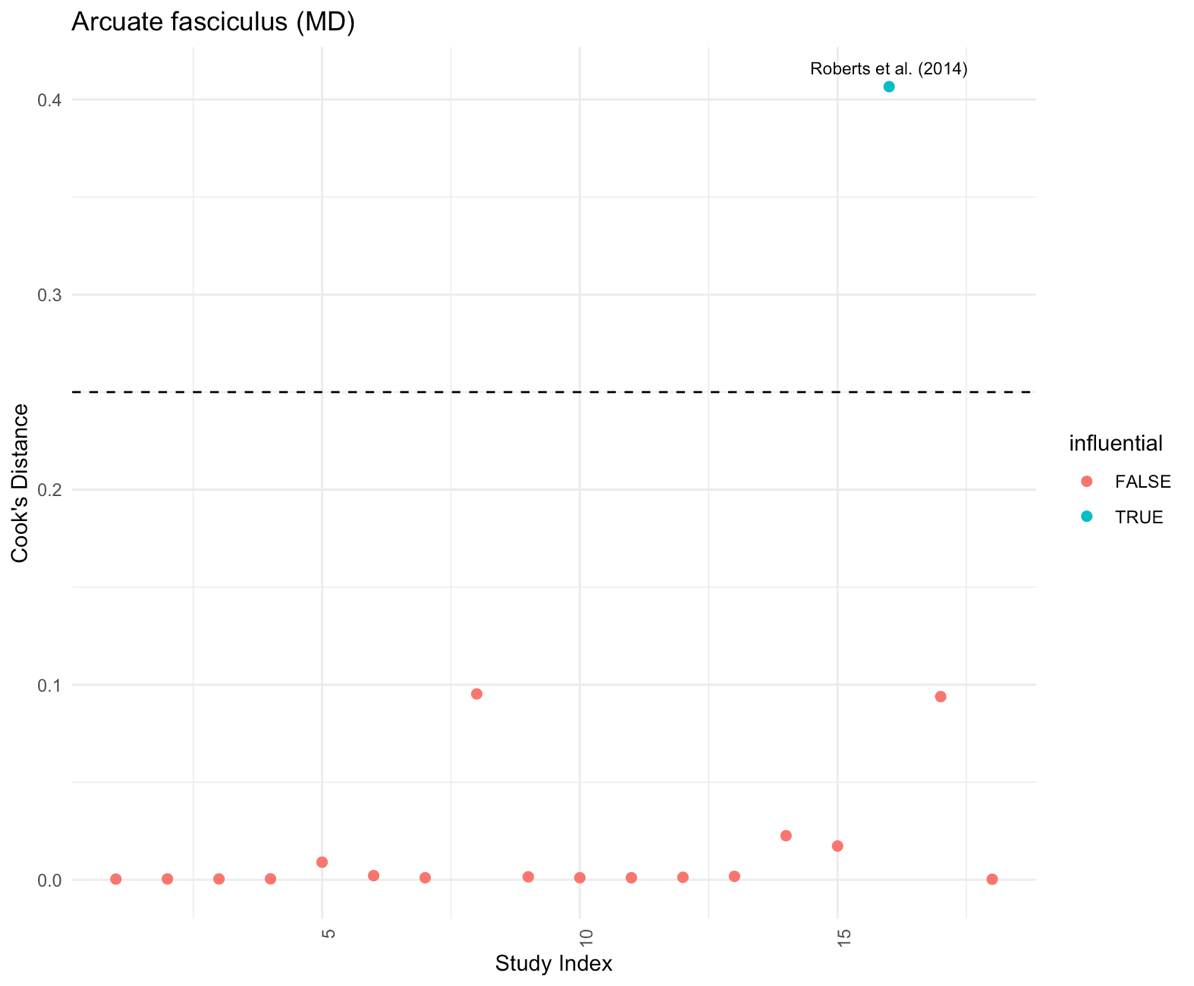


1. Inferior fronto-occipital fasciculus


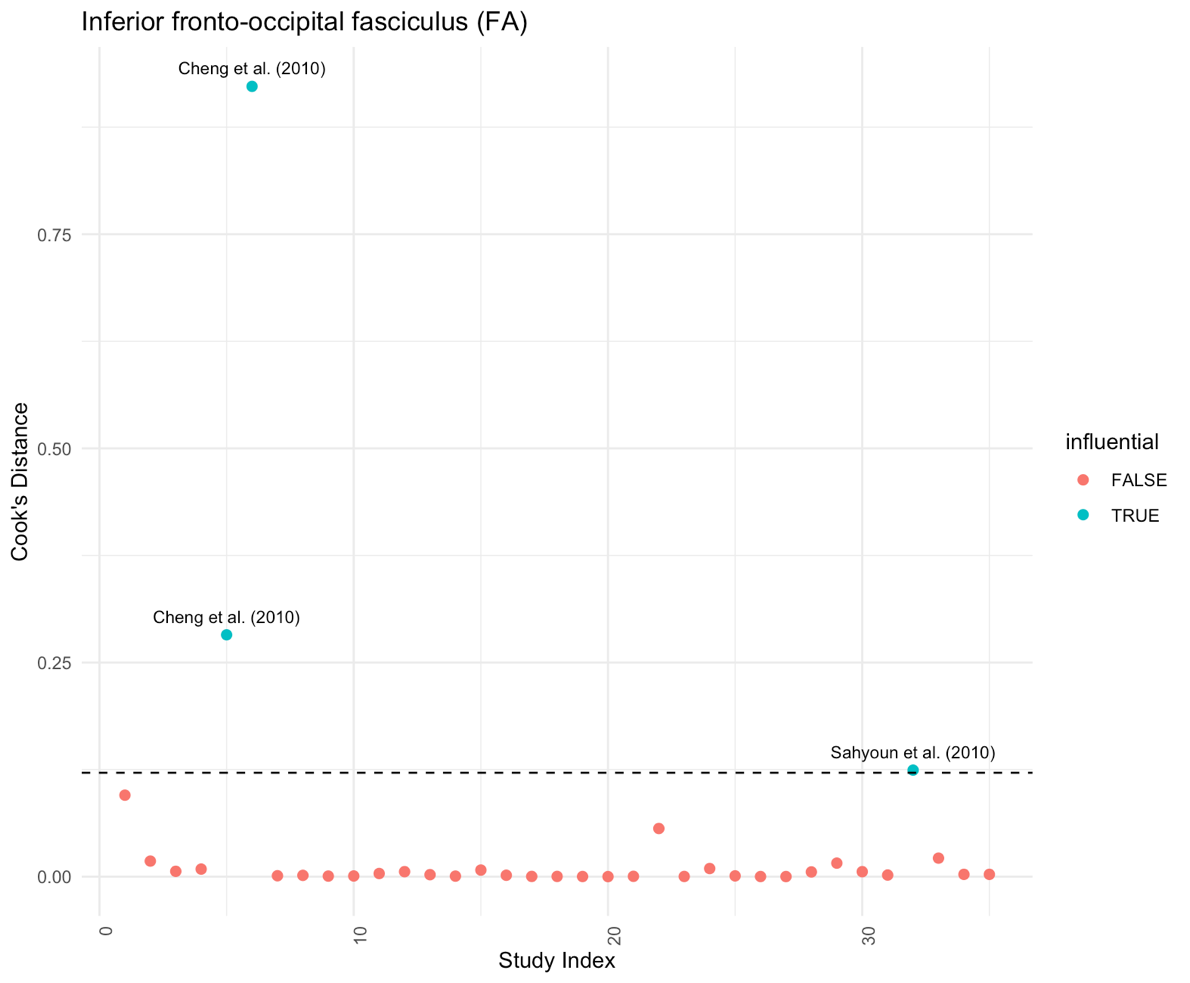


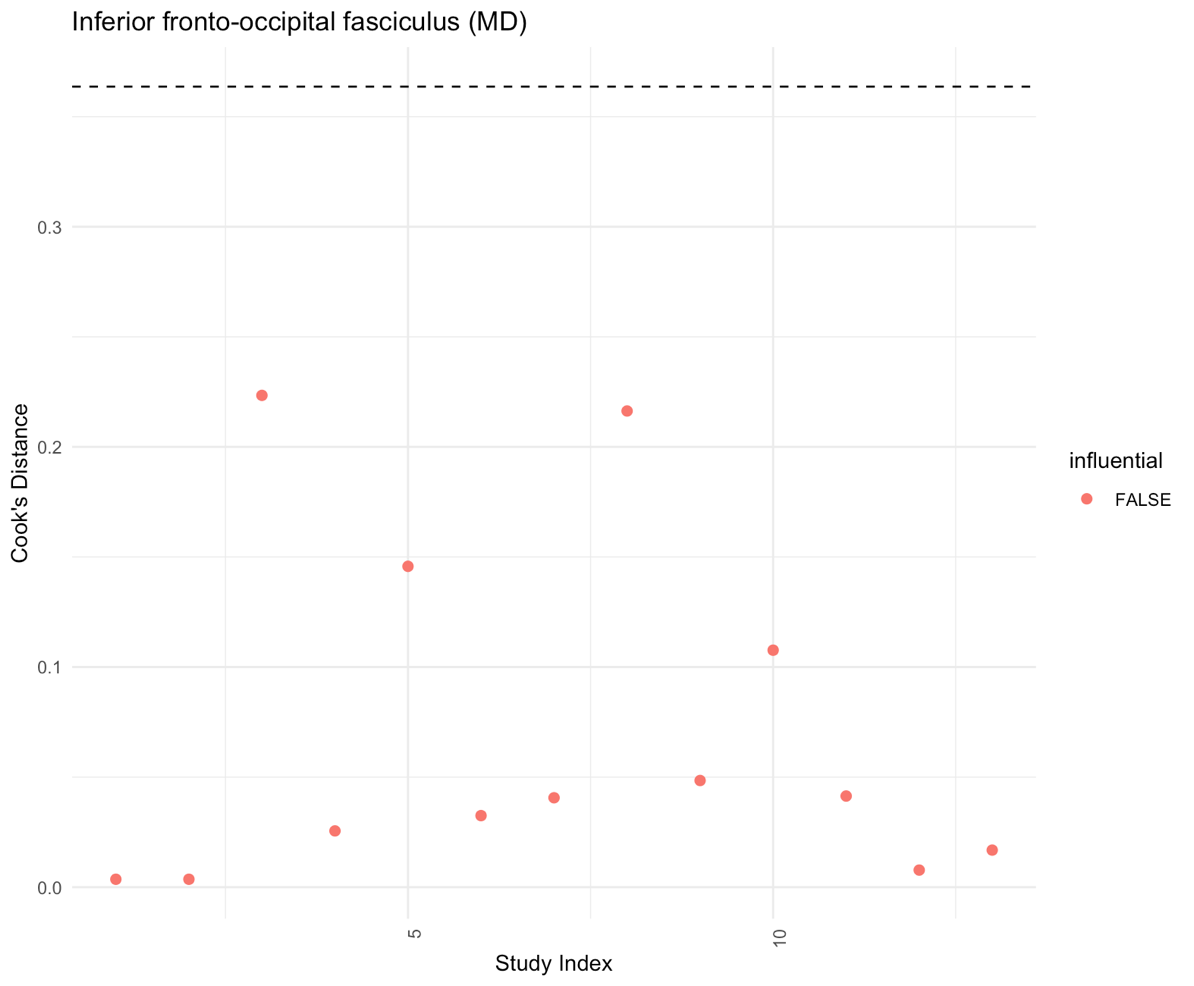


1. Inferior longitudinal fasciculus


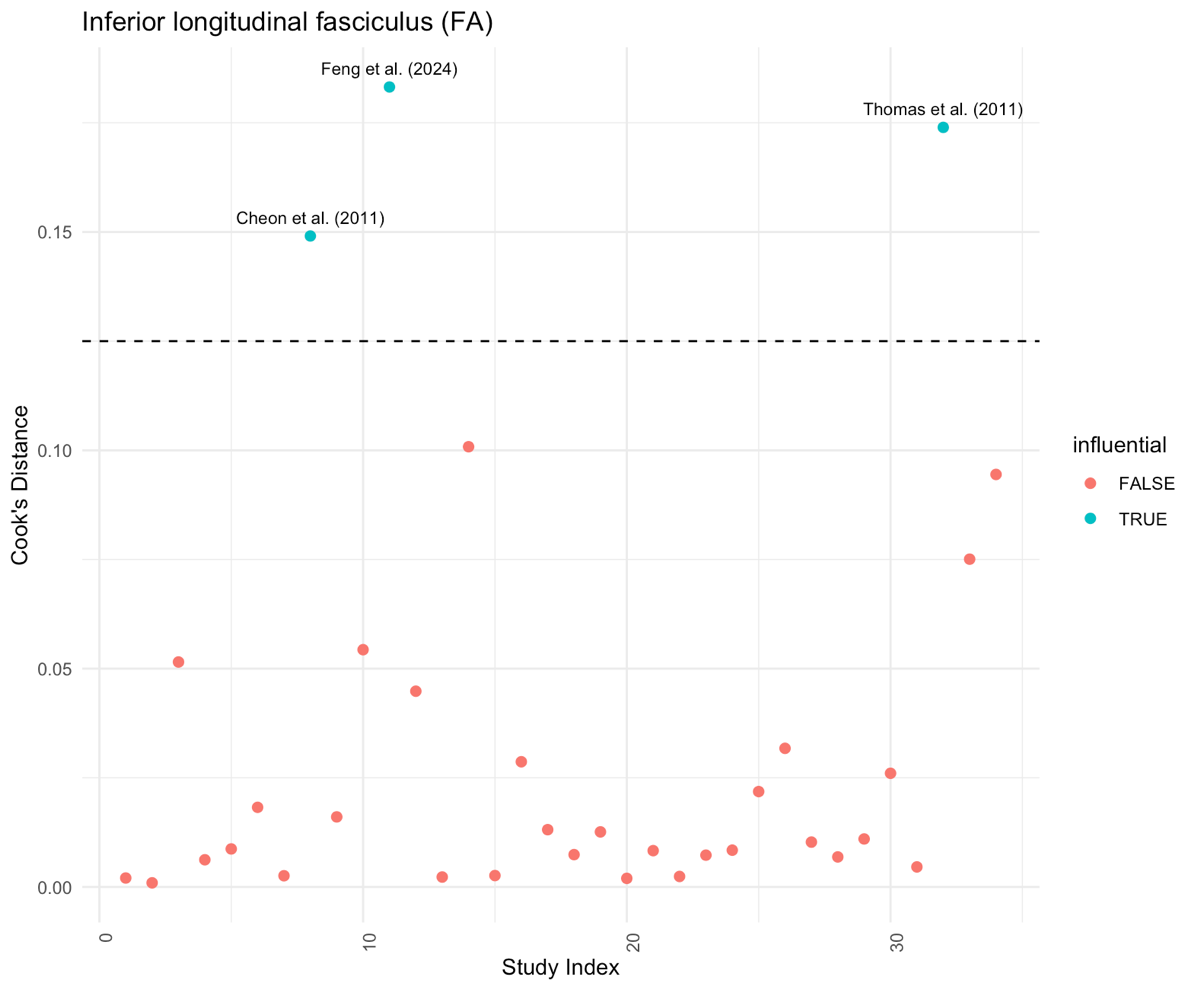


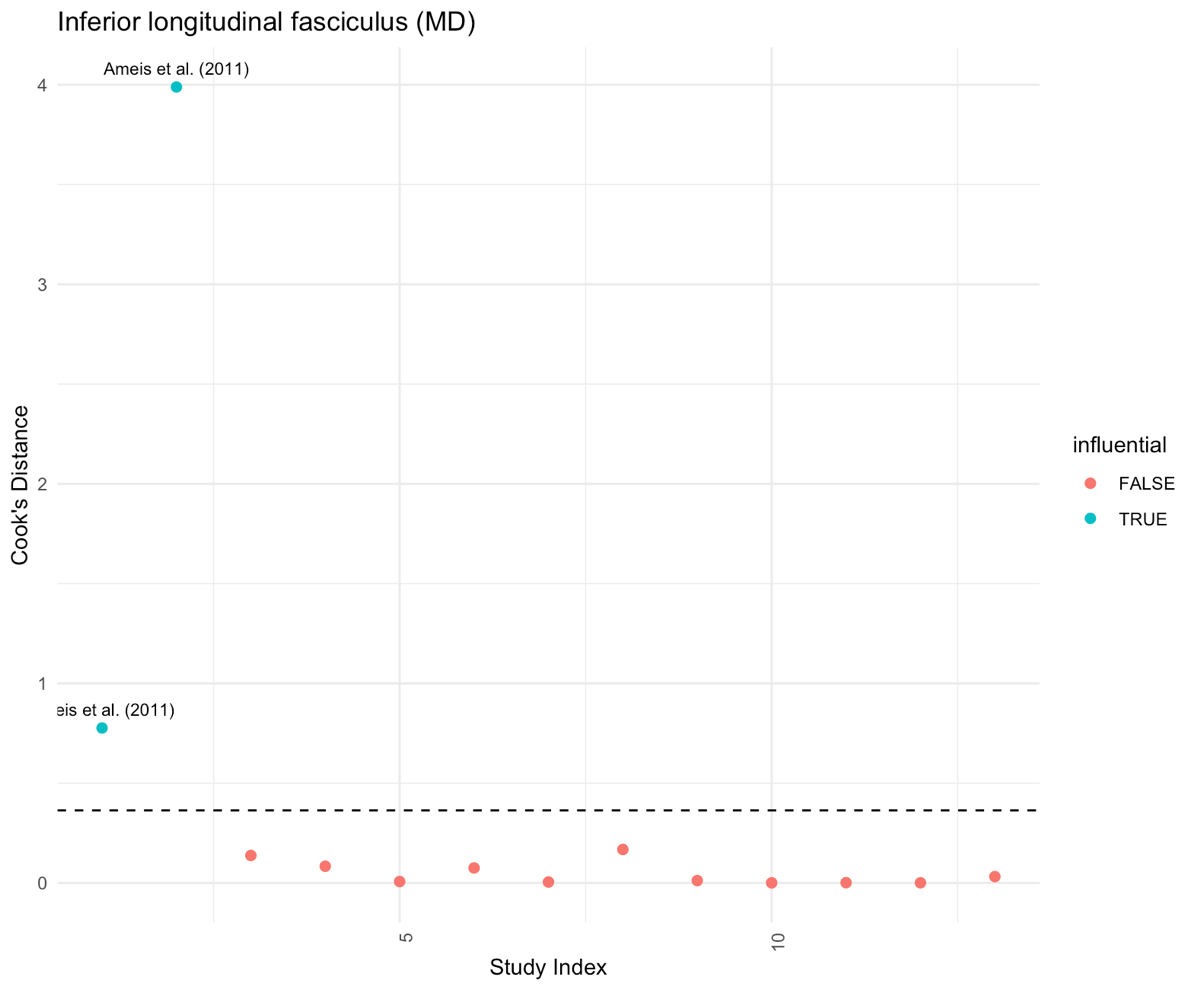


1. Superior longitudinal fasciculus


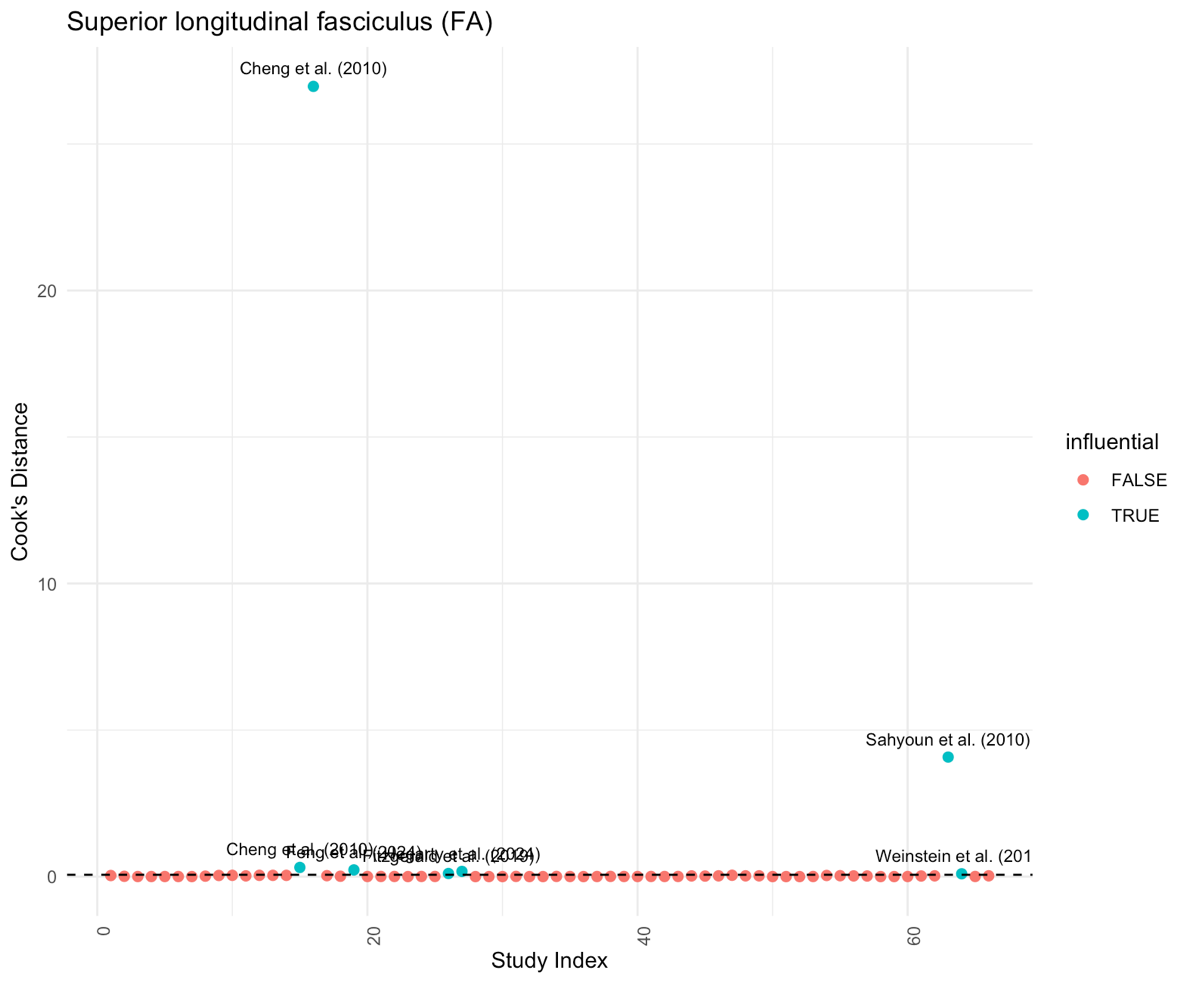


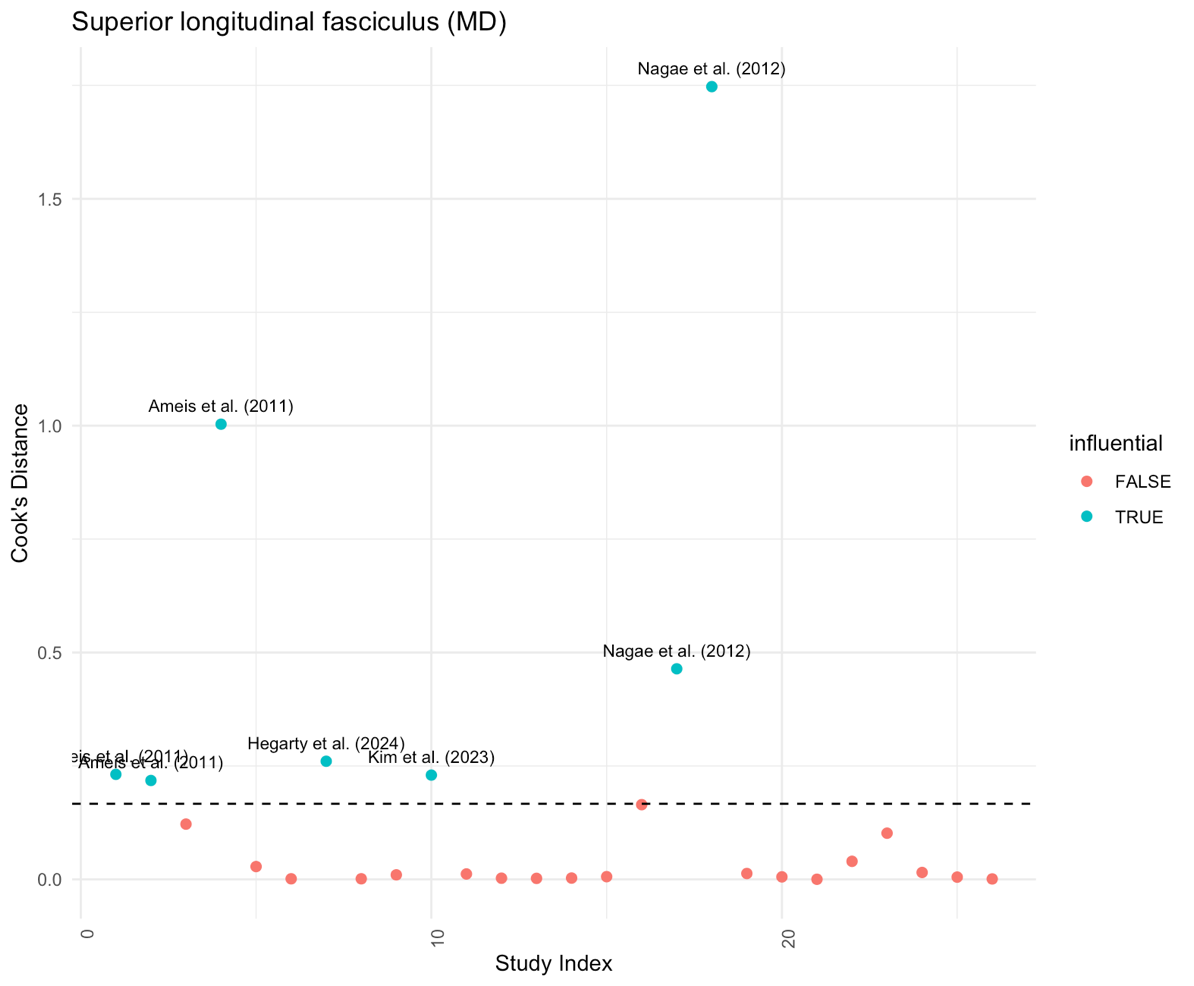


1. Uncinate fasciculus


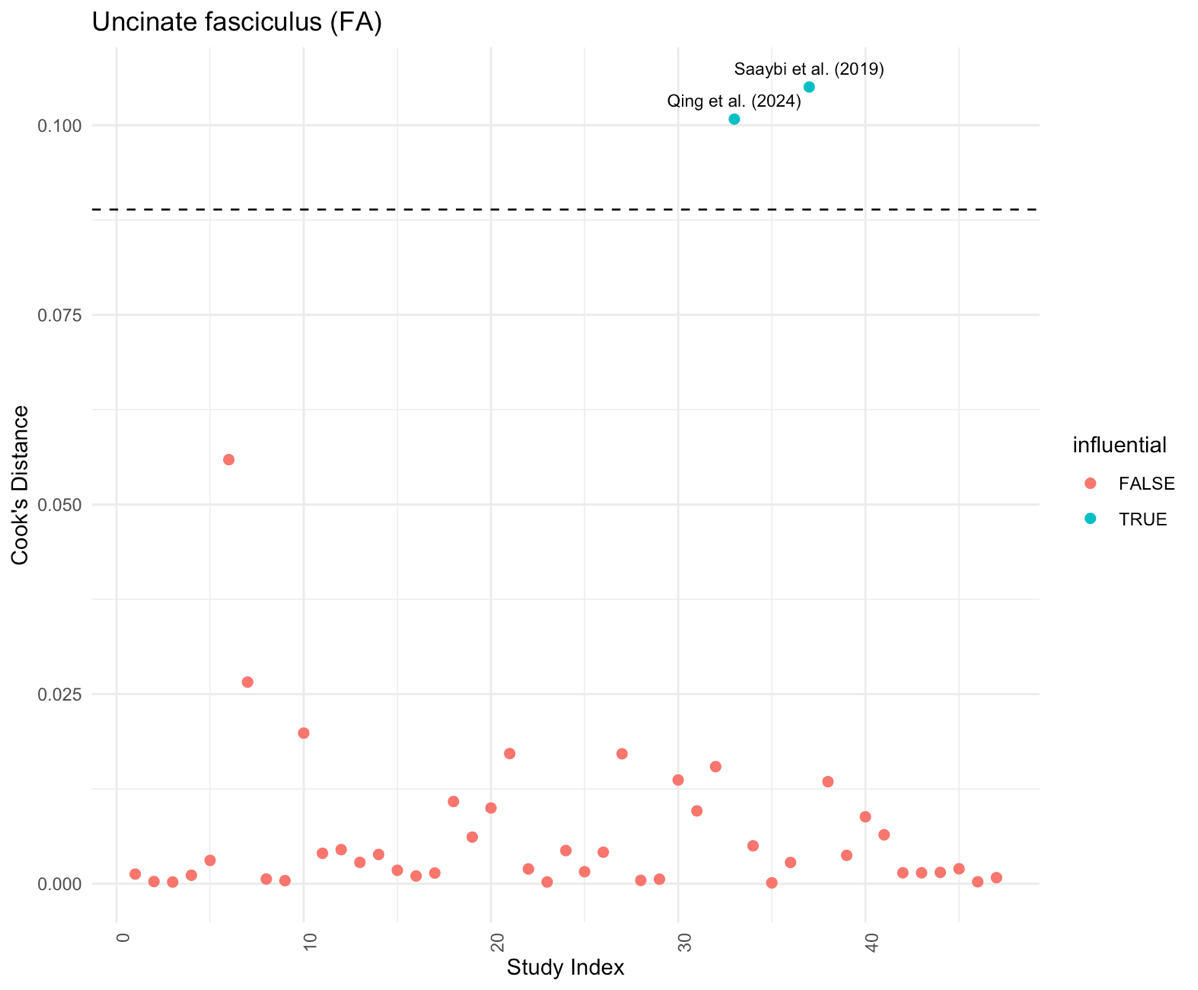


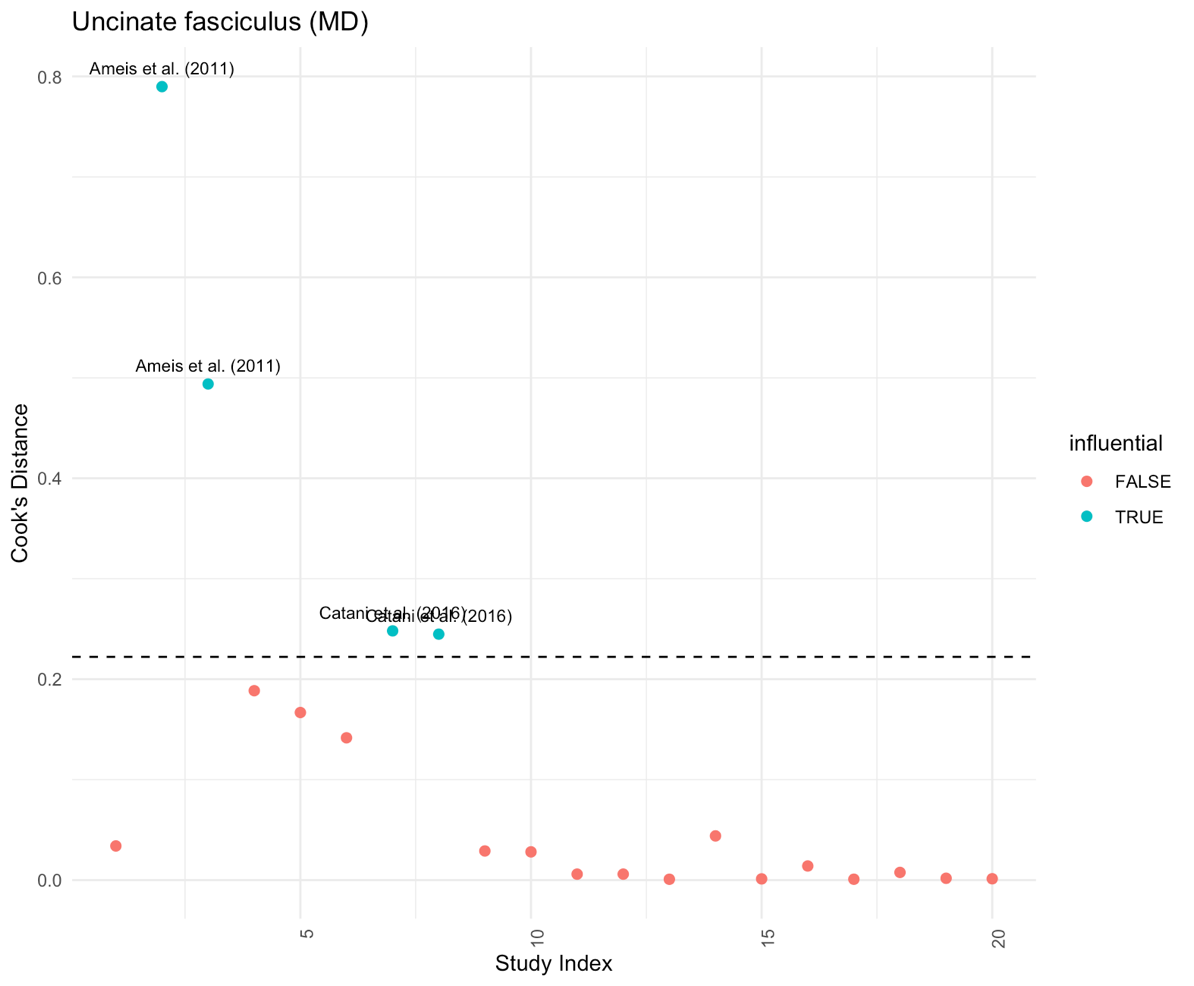

Supplement: Supplementary file 1 [file 0bac37e0b3f66c6d9a5349c0.docx]
