# Supplementary material for: Widespread alterations in white matter microstructure in autism: A multilevel meta-analysis
Source: Research Square preprint supplement (doi:10.21203/rs.3.rs-7411531/v1), 2025-09-23
Supplement: Supplementary file 2 [file 1d7b6badcbf3ca8288a88142.docx]

**Table S1.** Quality assessment score of the included studies based on the modified Newcastle-Ottawa Scale.

| **Study** | **Reference** | **Total** |
| --- | --- | --- |
| Alexander et al. (2007) | Alexander AL, Lee JE, Lazar M, Boudos R, DuBray MB, Oakes TR, Miller JN, Lu J, Jeong EK, McMahon WM, Bigler ED. Diffusion tensor imaging of the corpus callosum in autism. NeuroImage. 2007;34(1):61-73 | 9 |
| Ameis et al. (2011) | Ameis SH, Fan J, Rockel C, Voineskos AN, Lobaugh NJ, Soorya L, Wang AT, Hollander E, Anagnostou E. Impaired structural connectivity of socio-emotional circuits in autism spectrum disorders: a diffusion tensor imaging study. PloS One. 2011;6(11):e28044. | 9.5 |
| Andica et al. (2021) | Andica C, Kamagata K, Kirino E, Uchida W, Irie R, Murata S, Aoki S. Neurite orientation dispersion and density imaging reveals white matter microstructural alterations in adults with autism. Mol Autism. 2021;12(1):48. | 9.5 |
| Billeci et al. (2012) | Billeci L, Calderoni S, Tosetti M, Catani M, Muratori F. White matter connectivity in children with autism spectrum disorders: a tract-based spatial statistics study. BMC Neurol. 2012 Nov 29;12(1):148. | 9.5 |
| Bloemen et al. (2010) | Bloemen OJ, Deeley Q, Sundram F, Daly EM, Barker GJ, Jones DK, van Amelsvoort TA, Schmitz N, Robertson D, Murphy KC, Murphy DG. White matter integrity in Asperger syndrome: a preliminary diffusion tensor magnetic resonance imaging study in adults. Autism Res. 2010;3(5):203-13. | 9 |
| Boets et al. (2018) | Boets B, Van Eylen L, Sitek K, Moors P, Noens I, Steyaert J, Sunaert S, Wagemans J. Alterations in the inferior longitudinal fasciculus in autism and associations with visual processing: a diffusion-weighted MRI study. Mol Autism. 2018;9(1):10. | 9.5 |
| Braden et al. (2017) | Braden BB, Smith CJ, Thompson A, Glaspy TK, Wood E, Vatsa D, Abbott AE, McGee SC, Baxter LC. Executive function and functional and structural brain differences in middle‐age adults with autism spectrum disorder. Autism Res. 2017;10(12):1945-59. | 9 |
| Brito et al. (2009) | Brito AR, Vasconcelos MM, Domingues RC, Hygino da Cruz Jr LC, Rodrigues LD, Gasparetto EL, Calçada CA. Diffusion tensor imaging findings in school‐aged autistic children. Journal of Neuroimaging. 2009;19(4):337-43. | 9 |
| Carper et al. (2015) | Carper RA, Solders S, Treiber JM, Fishman I, Müller RA. Corticospinal tract anatomy and functional connectivity of primary motor cortex in autism. J Am Acad Child Adolesc Psychiatry. 2015;54(10):859-67. | 10 |
| Catani et al. (2016) | Catani M, Dell’Acqua F, Budisavljevic S, Howells H, Thiebaut de Schotten M, Froudist-Walsh S, D’anna L, Thompson A, Sandrone S, Bullmore ET, Suckling J. Frontal networks in adults with autism spectrum disorder. Brain. 2016;139(2):616-30. | 9 |
| Chang et al. (2014) | Chang YS, Owen JP, Desai SS, Hill SS, Arnett AB, Harris J, Marco EJ, Mukherjee P. Autism and sensory processing disorders: shared white matter disruption in sensory pathways but divergent connectivity in social-emotional pathways. PloS One. 2014;9(7):e103038. | 9 |
| Cheng et al. (2010) | Cheng Y, Chou KH, Chen IY, Fan YT, Decety J, Lin CP. Atypical development of white matter microstructure in adolescents with autism spectrum disorders. NeuroImage. 2010;50(3):873-82. | 9 |
| Cheon et al. (2011) | Cheon KA, Kim YS, Oh SH, Park SY, Yoon HW, Herrington J, Nair A, Koh YJ, Jang DP, Kim YB, Leventhal BL. Involvement of the anterior thalamic radiation in boys with high functioning autism spectrum disorders: a diffusion tensor imaging study. Brain Research. 2011;1417:77-86. | 9 |
| D'Mello et al. (2023) | D'Mello AM, Frosch IR, Meisler SL, Grotzinger H, Perrachione TK, Gabrieli JD. Diminished repetition suppression reveals selective and systems-level face processing differences in ASD. J Neurosci. 2023;43(11):1952-62. | 10 |
| Failla et al. (2017) | Failla MD, Peters BR, Karbasforoushan H, Foss-Feig JH, Schauder KB, Heflin BH, Cascio CJ. Intrainsular connectivity and somatosensory responsiveness in young children with ASD. Mol Autism. 2017;8(1):25. | 9.5 |
| Feng et al. (2024) | Feng Y, Huang X, Zhao W, Ming Y, Zhou Y, Feng R, Xiao J, Shan X, Kang X, Duan X, Chen H. Association among internalizing problems, white matter integrity, and social difficulties in children with autism spectrum disorder. Progress in Neuro-Psychopharmacology and Biological Psychiatry. 2024;135:111109. | 10 |
| Fingher et al. (2017) | Fingher N, Dinstein I, Ben-Shachar M, Haar S, Dale AM, Eyler L, Pierce K, Courchesne E. Toddlers later diagnosed with autism exhibit multiple structural abnormalities in temporal corpus callosum fibers. Cortex. 2017;97:291-305. | 9.5 |
| Fitzgerald et al. (2018) | Fitzgerald J, Leemans A, Kehoe E, O'Hanlon E, Gallagher L, McGrath J. Abnormal fronto‐parietal white matter organisation in the superior longitudinal fasciculus branches in autism spectrum disorders. Eur J of Neuroscience. 2018;47(6):652-61. | 9 |
| Fitzgerald et al. (2019) | Fitzgerald J, Gallagher L, McGrath J. Widespread disrupted white matter microstructure in autism spectrum disorders. J Autism Dev Disord. 2019;49(7):2664-74. | 9.5 |
| Fletcher et al. (2010) | Fletcher PT, Whitaker RT, Tao R, DuBray MB, Froehlich A, Ravichandran C, Alexander AL, Bigler ED, Lange N, Lainhart JE. Microstructural connectivity of the arcuate fasciculus in adolescents with high-functioning autism. NeuroImage. 2010;51(3):1117-25. | 9 |
| Fu et al. (2022) | Fu L, Li C, Li Y, Cheng X, Cui X, Jiang J, Ding N, Fang H, Tang T, Ke X. Heritability of abnormalities in limbic networks of autism spectrum disorder children: Evidence from an autism spectrum disorder twin study. Autism Res. 2022;15(4):628-40. | 9.5 |
| Haigh et al. (2020) | Haigh SM, Keller TA, Minshew NJ, Eack SM. Reduced white matter integrity and deficits in neuropsychological functioning in adults with autism spectrum disorder. Autism Res. 2020;13(5):702-14. | 9.5 |
| Hanaie et al. (2013) | Hanaie R, Mohri I, Kagitani-Shimono K, Tachibana M, Azuma J, Matsuzaki J, Watanabe Y, Fujita N, Taniike M. Altered microstructural connectivity of the superior cerebellar peduncle is related to motor dysfunction in children with autistic spectrum disorders. Cerebellum. 2013;12(5):645-56. | 9.5 |
| Hanaie et al. (2014) | Hanaie R, Mohri I, Kagitani-Shimono K, Tachibana M, Matsuzaki J, Watanabe Y, Fujita N, Taniike M. Abnormal corpus callosum connectivity, socio-communicative deficits, and motor deficits in children with autism spectrum disorder: a diffusion tensor imaging study. J Autism Dev Disord. 2014;44(9):2209-20. | 10 |
| Hegarty et al. (2024) | Hegarty II JP, Monterrey JC, Tian Q, Cleveland SC, Gong X, Phillips JM, Wolke ON, McNab JA, Hallmayer JF, Reiss AL, Hardan AY. A twin study of altered white matter heritability in youth with autism spectrum disorder. J Am Acad Child Adolesc Psychiatry. 2024;63(1):65-79. | 9.5 |
| Hong et al. (2011) | Hong S, Ke X, Tang T, Hang Y, Chu K, Huang H, Ruan Z, Lu Z, Tao G, Liu Y. Detecting abnormalities of corpus callosum connectivity in autism using magnetic resonance imaging and diffusion tensor tractography. Psychiatry Research: NeuroImaging. 2011;194(3):333-9. | 8.5 |
| Jou et al. (2011) | Jou RJ, Mateljevic N, Kaiser MD, Sugrue DR, Volkmar FR, Pelphrey KA. Structural neural phenotype of autism: preliminary evidence from a diffusion tensor imaging study using tract-based spatial statistics. Am J Neuroradiol. 2011;32(9):1607-13. | 9 |
| Jou et al. (2016) | Jou RJ, Reed HE, Kaiser MD, Voos AC, Volkmar FR, Pelphrey KA. White matter abnormalities in autism and unaffected siblings. JNP. 2016;28(1):49-55. | 9.5 |
| Kato et al. (2019) | Kato Y, Kagitani-Shimono K, Matsuzaki J, Hanaie R, Yamamoto T, Tominaga K, Watanabe Y, Mohri I, Taniike M. White matter tract-cognitive relationships in children with high-functioning autism spectrum disorder. Psychiatry Investig. 2019;16(3):220. | 9 |
| Kim et al. (2023) | Kim JI, Bang S, Yang JJ, Kwon H, Jang S, Roh S, Kim SH, Kim MJ, Lee HJ, Lee JM, Kim BN. Classification of preschoolers with low-functioning autism spectrum disorder using multimodal MRI data. J Autism Dev Disord. 2023;53(1):25-37. | 9.5 |
| Knaus et al. (2010) | Knaus TA, Silver AM, Kennedy M, Lindgren KA, Dominick KC, Siegel J, Tager-Flusberg H. Language laterality in autism spectrum disorder and typical controls: a functional, volumetric, and diffusion tensor MRI study. Brain and Language. 2010;112(2):113-20. | 9 |
| Kumar et al. (2010) | Kumar A, Sundaram SK, Sivaswamy L, Behen ME, Makki MI, Ager J, Janisse J, Chugani HT, Chugani DC. Alterations in frontal lobe tracts and corpus callosum in young children with autism spectrum disorder. Cerebral Cortex. 2010;20(9):2103-13. | 9.5 |
| Lei et al. (2019) | Lei J, Lecarie E, Jurayj J, Boland S, Sukhodolsky DG, Ventola P, Pelphrey KA, Jou RJ. Altered neural connectivity in females, but not males with autism: Preliminary evidence for the female protective effect from a quality‐controlled diffusion tensor imaging study. Autism Res. 2019;12(10):1472-83. | 9 |
| McGrath et al. (2013) | McGrath J, Johnson K, O'Hanlon E, Garavan H, Gallagher L, Leemans A. White matter and visuospatial processing in autism: a constrained spherical deconvolution tractography study. Autism Res. 2013;6(5):307-19. | 9 |
| Mohajer et al. (2019) | Mohajer B, Masoudi M, Ashrafi A, Mohammadi E, Ershadi AS, Aarabi MH, Uban KA. Structural white matter alterations in male adults with high functioning autism spectrum disorder and concurrent depressive symptoms; a diffusion tensor imaging study. Journal of Affective Disorders. 2019;259:40-6. | 9 |
| Nagae et al. (2012) | Nagae LM, Zarnow DM, Blaskey L, Dell J, Khan SY, Qasmieh S, Levy SE, Roberts TP. Elevated mean diffusivity in the left hemisphere superior longitudinal fasciculus in autism spectrum disorders increases with more profound language impairment. Am J Neuroradiol. 2012;33(9):1720-5. | 8 |
| Ogur & Boyunaga (2015) | Ogur T, Boyunaga OL. Relation of behavior problems with findings of cranial diffusion tensor MRI and MR spectroscopy in autistic children. International Journal of Clinical and Experimental Medicine. 2015;8(4):5621. | 8.5 |
| Olivé et al. (2022) | Olivé G, Slušná D, Vaquero L, Muchart-López J, Rodríguez-Fornells A, Hinzen W. Structural connectivity in ventral language pathways characterizes non-verbal autism. Brain Struct Funct. 2022;227(5):1817-29. | 9.5 |
| Ouyang et al. (2016) | Ouyang M, Cheng H, Mishra V, Gong G, Mosconi MW, Sweeney J, Peng Y, Huang H. Atypical age‐dependent effects of autism on white matter microstructure in children of 2–7 years. Hum Brain Mapp. 2016;37(2):819-32. | 9 |
| Payabvash et al. (2019) | Payabvash S, Palacios EM, Owen JP, Wang MB, Tavassoli T, Gerdes M, Brandes-Aitken A, Cuneo D, Marco EJ, Mukherjee P. White matter connectome edge density in children with autism spectrum disorders: potential imaging biomarkers using machine-learning models. Brain Connect. 2019;9(2):209-20. | 9 |
| Peterson et al. (2015) | Peterson D, Mahajan R, Crocetti D, Mejia A, Mostofsky S. Left‐hemispheric microstructural abnormalities in children with high‐functioning autism spectrum disorder. Autism Res. 2015;8(1):61-72. | 9.5 |
| Poustka et al. (2012) | Poustka L, Jennen-Steinmetz C, Henze R, Vomstein K, Haffner J, Sieltjes B. Fronto-temporal disconnectivity and symptom severity in children with autism spectrum disorder. The World Journal of Biological Psychiatry. 2012;13(4):269-80. | 9.5 |
| Pryweller et al. (2014) | Pryweller JR, Schauder KB, Anderson AW, Heacock JL, Foss-Feig JH, Newsom CR, Loring WA, Cascio CJ. White matter correlates of sensory processing in autism spectrum disorders. NeuroImage Clin. 2014;6:379-87. | 9.5 |
| Pugliese et al. (2009) | Pugliese L, Catani M, Ameis S, Dell'Acqua F, de Schotten MT, Murphy C, Robertson D, Deeley Q, Daly E, Murphy DG. The anatomy of extended limbic pathways in Asperger syndrome: a preliminary diffusion tensor imaging tractography study. NeuroImage. 2009;47(2):427-34. | 9 |
| Qing et al. (2024) | Qing P, Zhang X, Liu Q, Huang L, Xu D, Le J, Kendrick KM, Lai H, Zhao W. Structure-function coupling in white matter uncovers the hypoconnectivity in autism spectrum disorder. Mol autism. 2024;15(1):43. | 10 |
| Roberts et al. (2014) | Roberts TP, Heiken K, Zarnow D, Dell J, Nagae L, Blaskey L, Solot C, Levy SE, Berman JI, Edgar JC. Left hemisphere diffusivity of the arcuate fasciculus: influences of autism spectrum disorder and language impairment. Am J Neuroradiol. 2014;35(3):587-92. | 9 |
| Roine et al. (2015) | Roine U, Salmi J, Roine T, Wendt TN, Leppämäki S, Rintahaka P, Tani P, Leemans A, Sams M. Constrained spherical deconvolution-based tractography and tract-based spatial statistics show abnormal microstructural organization in Asperger syndrome. Mol autism. 2015;6(1):4. | 9 |
| Saaybi et al. (2019) | Saaybi S, AlArab N, Hannoun S, Saade M, Tutunji R, Zeeni C, Shbarou R, Hourani R, Boustany RM. Pre-and post-therapy assessment of clinical outcomes and white matter integrity in autism spectrum disorder: pilot study. Front Neurol. 2019;10:877. | 9.5 |
| Sahyoun et al. (2010) | Sahyoun CP, Belliveau JW, Mody M. White matter integrity and pictorial reasoning in high-functioning children with autism. Brain Cogn. 2010;73(3):180-8. | 9.5 |
| Samson et al. (2016) | Samson AC, Dougherty RF, Lee IA, Phillips JM, Gross JJ, Hardan AY. White matter structure in the uncinate fasciculus: implications for socio-affective deficits in autism spectrum disorder. Psychiatry Research: Neuroimaging. 2016;255:66-74. | 10 |
| Sivaswamy et al. (2010) | Sivaswamy L, Kumar A, Rajan D, Behen M, Muzik O, Chugani D, Chugani H. A diffusion tensor imaging study of the cerebellar pathways in children with autism spectrum disorder. J Child Neurol. 2010;25(10):1223-31. | 9.5 |
| Thomas et al. (2011) | Thomas C, Humphreys K, Jung KJ, Minshew N, Behrmann M. The anatomy of the callosal and visual-association pathways in high-functioning autism: a DTI tractography study. Cortex. 2011;47(7):863-73. | 8.5 |
| Travers et al. (2015) | Travers BG, Bigler ED, Tromp DP, Adluru N, Destiche D, Samsin D, Froehlich A, Prigge MD, Duffield TC, Lange N, Alexander AL. Brainstem white matter predicts individual differences in manual motor difficulties and symptom severity in autism. J Autism Dev Disord. 2015;45(9):3030-40. | 9 |
| Vogan et al. (2016) | Vogan VM, Morgan BR, Leung RC, Anagnostou E, Doyle-Thomas K, Taylor MJ. Widespread white matter differences in children and adolescents with autism spectrum disorder. J Autism Dev Disord. 2016;46(6):2138-47. | 9.5 |
| Walker et al. (2012) | Walker L, Gozzi M, Lenroot R, Thurm A, Behseta B, Swedo S, Pierpaoli C. Diffusion tensor imaging in young children with autism: biological effects and potential confounds. Biol Psychiatry. 2012;72(12):1043-51. | 9.5 |
| Wang et al. (2024) | Wang L, Ding S, Qin W, Zhang Y, Qin B, Huang K, Zheng H, Cai J. Alterations in the white matter fiber tracts of preschool-aged children with autism spectrum disorder: an automated fiber quantification study. Quant Imaging Med Surg. 2024;14(12):9347. | 9.5 |
| Weinstein et al. (2011) | Weinstein M, Ben‐Sira L, Levy Y, Zachor DA, Itzhak EB, Artzi M, Tarrasch R, Eksteine PM, Hendler T, Bashat DB. Abnormal white matter integrity in young children with autism. Hum Brain Mapp. 2011;32(4):534-43. | 8.5 |
| Yoshikawa et al. (2021) | Yoshikawa H, Kitamura S, Matsuoka K, Takahashi M, Ishida R, Kishimoto N, Yasuno F, Yasuda Y, Hashimoto R, Miyasaka T, Kichikawa K. Adverse childhood experience is associated with disrupted white matter integrity in autism spectrum disorder: A diffusion tensor imaging study. Front Psychiatry. 2021;12:823260. | 9.5 |
| Zhang et al. (2018) | Zhang L, Li K, Zhang C, Qi X, Zheng N, Wang G. Arcuate fasciculus in autism spectrum disorder toddlers with language regression. Open Medicine. 2018;13(1):90-5 | 9.5 |

*Note*. The quality assessment was based on selection, comparability, outcome, and head motion control, with a total possible score of 10.

**Table S2.** Sensitivity analysis results across three different assumptions (*ρ* = 0.3, 0.6, and 0.9) for summary effect sizes, both before and after addressing influential cases.

| Tract | Metric | Influe. cases |  | Summary effect size for group difference | | | | | | | | | | | |
| --- | --- | --- | --- | --- | --- | --- | --- | --- | --- | --- | --- | --- | --- | --- | --- |
|  |  |  | *ρ* = 0.3 | | |  | *ρ* = 0.6 | | | |  | *ρ* = 0.9 | | |
|  |  |  |  | *g* | 95% CI | *p* |  | *g* | 95% CI | *p* | *I2* |  | *g* | 95% CI | *p* |
| Commissural Tract | | | | | | | | | | | | | | | |
| Corpus callosum | FA | Before |  | -0.38 | [-0.57, -0.19] | **<.001** |  | -0.38 | [-0.56, -0.19] | **<.001** | 66.5% |  | -0.37 | [-0.55, -0.19] | **< .001** |
|  |  | After |  | -0.39 | [-0.55, -0.24] | **<.001** |  | -0.40 | [-0.55, -0.24] | **<.001** | 44.0% |  | -0.40 | [-0.55, -0.25] | **< .001** |
|  | MD | Before |  | 0.36 | [0.13, 0.59] | **0.002** |  | 0.36 | [0.13, 0.58] | **0.002** | 62.8% |  | 0.35 | [0.13, 0.58] | **0.002** |
|  |  | After |  | 0.32 | [0.08, 0.56] | **0.009** |  | 0.32 | [0.08, 0.55] | **0.008** | 63.2% |  | 0.32 | [0.09, 0.55] | **0.007** |
| Projection Tract | | | | | | | | | | | | | | | |
| Cerebellar peduncle | FA | Before |  | -0.05 | [-0.50, 0.39] | 0.816 |  | -0.04 | [-0.48, 0.40] | 0.862 | 87.3% |  | -0.03 | [-0.46, 0.41] | 0.904 |
|  |  | After |  | 0.07 | [-0.40, 0.53] | 0.785 |  | 0.08 | [-0.37, 0.53] | 0.731 | 80.4% |  | 0.09 | [-0.35, 0.53] | 0.674 |
|  | MD | Before |  | 0.55 | [-0.77, 1.87] | 0.413 |  | 0.53 | [-0.75, 1.81] | 0.417 | 94.3% |  | 0.51 | [-0.73, 1.75] | 0.421 |
|  |  | After |  | 0.72 | [-1.05, 2.50] | 0.426 |  | 0.7 | [-1.03, 2.43] | 0.429 | 95.5% |  | 0.68 | [-1.02, 2.38] | 0.431 |
| Corona radiata | FA | Before |  | -0.13 | [-0.47, 0.20] | 0.433 |  | -0.14 | [-0.47, 0.19] | 0.416 | 77.0% |  | -0.14 | [-0.47, 0.18] | 0.396 |
|  |  | After |  | -0.12 | [-0.48, 0.24] | 0.506 |  | -0.12 | [-0.47, 0.23] | 0.494 | 78.1% |  | -0.13 | [-0.47, 0.22] | 0.477 |
|  | MD | Before |  | 0.29 | [0.11, 0.47] | **0.001** |  | 0.29 | [0.01, 0.56] | **0.040** | 40.5% |  | 0.28 | [-0.07, 0.63] | 0.116 |
|  |  | After |  | 0.34 | [0.11, 0.58] | **0.004** |  | 0.34 | [0.14, 0.54] | **< .001** | 0.00% |  | 0.35 | [0.10, 0.59] | **0.005** |
| Corticospinal tract | FA | Before |  | -0.44 | [-0.74, -0.14] | **0.004** |  | -0.44 | [-0.73, -0.14] | **0.004** | 70.8% |  | -0.44 | [-0.73, -0.14] | **0.004** |
|  |  | After |  | -0.48 | [-0.86, -0.09] | **0.015** |  | -0.47 | [-0.85, -0.09] | **0.015** | 77.7% |  | -0.47 | [-0.84, -0.10] | **0.014** |
|  | MD | Before |  | 0.76 | [-0.07, 1.60] | 0.074 |  | 0.75 | [-0.06, 1.55] | 0.070 | 89.9% |  | 0.73 | [-0.05, 1.51] | 0.067 |
|  |  | After |  | 1.02 | [-0.23, 2.27] | 0.109 |  | 1.01 | [-0.23, 2.26] | 0.111 | 92.9% |  | 1.01 | [-0.24, 2.25] | 0.112 |
| Internal capsule | FA | Before |  | -0.34 | [-0.69, 0.01] | 0.060 |  | -0.32 | [-0.66, 0.02] | 0.066 | 75.6% |  | -0.30 | [-0.63, 0.03] | 0.071 |
|  |  | After |  | -0.22 | [-0.64, 0.20] | 0.302 |  | -0.21 | [-0.62, 0.20] | 0.306 | 77.1% |  | -0.21 | [-0.61, 0.20] | 0.315 |
|  | MD | Before |  | 0.33 | [-0.10, 0.76] | 0.135 |  | 0.32 | [-0.10, 0.74] | 0.135 | 72.5% |  | 0.31 | [-0.10, 0.72] | 0.135 |
|  |  | After |  | 0.32 | [-0.24, 0.88] | 0.268 |  | 0.31 | [-0.24, 0.86] | 0.275 | 78.7% |  | 0.30 | [-0.24, 0.84] | 0.280 |
| Thalamic radiation | FA | Before |  | -0.42 | [-0.74, -0.11] | **0.009** |  | -0.42 | [-0.72, -0.11] | **0.007** | 81.0% |  | -0.42 | [-0.71, -0.12] | **0.006** |
|  |  | After |  | -0.46 | [-0.74, -0.18] | **0.001** |  | -0.46 | [-0.73, -0.19] | **< .001** | 76.7% |  | -0.46 | [-0.72, -0.20] | **< .001** |
|  | MD | Before |  | 0.19 | [-0.07, 0.44] | 0.146 |  | 0.20 | [-0.06, 0.46] | 0.139 | 48.2% |  | 0.19 | [-0.07, 0.44] | 0.159 |
|  |  | After |  | 0.07 | [-0.09, 0.22] | 0.422 |  | 0.08 | [-0.10, 0.27] | 0.382 | 11.5% |  | 0.08 | [-0.15, 0.31] | 0.481 |
| Association Tract | | | | | | | | | | | | | | | |
| Arcuate fasciculus | FA | Before |  | -0.38 | [-0.65, -0.11] | **0.006** |  | -0.35 | [-0.60, -0.10] | **0.006** | 58.1% |  | -0.35 | [-0.63, -0.07] | **0.016** |
|  |  | After |  | -0.42 | [-0.73, -0.11] | **0.007** |  | -0.40 | [-0.70, -0.11] | **0.008** | 36.6% |  | -0.38 | [-0.66, -0.10] | **0.008** |
|  | MD | Before |  | 1.01 | [0.33, 1.69] | **0.004** |  | 0.98 | [0.32, 1.63] | **0.004** | 82.6% |  | 0.94 | [0.30, 1.59] | **0.004** |
|  |  | After |  | 1.11 | [0.27, 1.96] | **0.010** |  | 1.09 | [0.26, 1.91] | **0.010** | 85.3% |  | 1.07 | [0.25, 1.88] | **0.010** |
| Inferior fronto-occipital fasciculus | FA | Before |  | -0.56 | [-1.00, -0.11] | **0.015** |  | -0.54 | [-0.98, -0.10] | **0.016** | 82.5% |  | -0.52 | [-0.95, -0.09] | **0.017** |
|  | After |  | -0.61 | [-1.04, -0.17] | **0.007** |  | -0.59 | [-1.02, -0.16] | **0.007** | 80.2% |  | -0.57 | [-0.99, -0.15] | **0.008** |
|  | MD | Before |  | 0.73 | [0.46, 1.00] | **< .001** |  | 0.73 | [0.47, 1.00] | **< .001** | 30.8% |  | 0.74 | [0.47, 1.00] | **< .001** |
|  |  | After |  | - | - | - |  | - | - | - | - |  | - | - | - |
| Inferior longitudinal fasciculus | FA | Before |  | -0.57 | [-0.90, -0.23] | **< .001** |  | -0.56 | [-0.90, -0.23] | **< .001** | 77.9% |  | -0.56 | [-0.89, -0.23] | **< .001** |
|  | After |  | -0.50 | [-0.83, -0.16] | **0.004** |  | -0.49 | [-0.82, -0.16] | **0.004** | 74.6% |  | -0.49 | [-0.82, -0.15] | **0.004** |
|  | MD | Before |  | 0.51 | [0.17, 0.85] | **0.003** |  | 0.51 | [0.15, 0.87] | **0.005** | 71.0% |  | 0.51 | [0.10, 0.91] | **0.014** |
|  |  | After |  | 0.55 | [0.19, 0.91] | **0.003** |  | 0.55 | [0.21, 0.90] | **0.002** | 59.8% |  | 0.56 | [0.22, 0.89] | **0.001** |
| Superior longitudinal fasciculus | FA | Before |  | -0.26 | [-0.57, 0.05] | 0.106 |  | -0.24 | [-0.57, 0.10] | 0.166 | 92.1% |  | -0.22 | [-0.58, 0.14] | 0.229 |
|  | After |  | -0.41 | [-0.76, -0.05] | **0.026** |  | -0.40 | [-0.75, -0.05] | **0.027** | 83.1% |  | -0.39 | [-0.74, -0.04] | **0.028** |
|  | MD | Before |  | 0.70 | [0.21, 1.19] | **0.005** |  | 0.69 | [0.22, 1.15] | **0.004** | 83.0% |  | 0.68 | [0.23, 1.12] | **0.003** |
|  |  | After |  | 0.67 | [0.22, 1.11] | **0.003** |  | 0.66 | [0.23, 1.09] | **0.003** | 75.0% |  | 0.65 | [0.23, 1.07] | **0.002** |
| Uncinate fasciculus | FA | Before |  | -0.52 | [-0.84, -0.20] | **0.001** |  | -0.52 | [-0.83, -0.20] | **0.001** | 78.0% |  | -0.51 | [-0.81, -0.21] | **< .001** |
|  |  | After |  | -0.48 | [-0.80, -0.17] | **0.003** |  | -0.48 | [-0.79, -0.17] | **0.002** | 77.2% |  | -0.48 | [-0.78, -0.18] | **0.002** |
|  | MD | Before |  | 0.32 | [-0.03, 0.67] | 0.072 |  | 0.31 | [-0.05, 0.67] | 0.089 | 76.0% |  | 0.30 | [-0.07, 0.66] | 0.111 |
|  |  | After |  | 0.30 | [-0.09, 0.70] | 0.133 |  | 0.30 | [-0.10, 0.70] | 0.144 | 70.0% |  | 0.29 | [-0.12, 0.69] | 0.162 |

*Note*. Negative effect size = a lower value in ASD compared to TD; positive effect size = a higher value in ASD compared to TD. - = not applicable; FA = fractional anisotropy; MD = mean diffusivity.

**Table S3.** An explanation of moderator selection.

| **Moderator** | **Explanation** |
| --- | --- |
| Age | Research suggests that patterns of white matter differences in ASD are not static but evolve throughout an individual's lifespan [1, 2, 3, 4, 5]. Specifically, evidence from cross-sectional investigations [2, 3, 5] and a longitudinal study [4] reveals age-related differences in white matter microstructure between ASD and TD, with these group-level differences varying across childhood, adolescence, and adulthood, with distinct developmental patterns observed in ASD. These studies collectively emphasize the relevance of age in moderating white matter microstructural characteristics in ASD. |
| Sex | Research suggests that ASD traits manifest differently between sexes [6], with autistic males exhibiting reduced white matter connectivity, particularly in frontal and some language-related tracts, while such differences were not observed in autistic females [7], suggesting sex-specific neuroanatomical patterns. Studies also suggest that neuroanatomical features in ASD differ by sex, with minimal overlap in affected regions [8, 9], suggesting that the biological foundations of ASD in females may involve some differences in developmental processes compared to those in males. Furthermore, meta-analytic evidence suggests that sex contributes to variability in white matter alterations [10], highlighting the importance of considering sex as a moderating variable. |
| IQ | IQ has often been considered in autism research, particularly in understanding cognitive profiles and functional outcomes [11]. Recent neuroimaging research suggests that individuals with ASD who have intellectual impairments exhibit more pronounced white matter differences, particularly in tracts related to executive function, processing speed, and language [12]. However, meta-analytic findings revealed no moderating effect of IQ on white matter differences in ASD in tracts associated with language [10]. These mixed findings necessitate further investigation of IQ as a moderating factor across a broader array of white matter tracts. However, due to insufficient data for many of the tracts, particularly for the MD metric, the IQ moderation effect was only partially examined. |
| Laterality | Laterality was selected to examine potential lateralized microstructural differences in ASD, as individuals with ASD have demonstrated atypical hemispheric asymmetries across several brain regions [13, 14, 15]. Structural studies have reported reduced or reversed asymmetry in the frontal, temporal, and subcortical areas that are commonly associated with functions such as communication, cognition, and social behavior [15, 16]. Additionally, given that key speech and language processes are functionally lateralized, particularly through a left-dominant dorsal stream [17], collectively, examining the role of laterality in white matter differences is warranted. |

**References**

1. Huang X, Ming Y, Zhao W, Feng R, Zhou Y, Wu L, et al. Developmental prediction modeling based on diffusion tensor imaging uncovering age-dependent heterogeneity in early childhood autistic brain. MolAutism. 2023;14(1):41.

2. Karahanoğlu FI, Baran B, Nguyen QTH, Meskaldji DE, Yendiki A, Vangel M, et al. Diffusion-weighted imaging evidence of altered white matter development from late childhood to early adulthood in autism spectrum disorder. NeuroImage: Clinical. 2018;19:840–7.

3. Koolschijn PCMP, Caan MWA, Teeuw J, Olabarriaga SD, Geurts HM. Age-related differences in autism: the case of white matter microstructure. Hum Brain Mapp. 2017;38(1):82–96.

4. Travers BG, Tromp DPM, Adluru N, Lange N, Destiche D, Ennis C, et al. Atypical development of white matter microstructure of the corpus callosum in males with autism: a longitudinal investigation. Mol Autism. 2015;6(1):15.

5. Weber CF, Lake EMR, Haider SP, Mozayan A, Mukherjee P, Scheinost D, et al. Age-dependent white matter microstructural disintegrity in autism spectrum disorder. Front Neurosci. 2022;16:957018.

6. Werling DM, Geschwind DH. Sex differences in autism spectrum disorders. Current Opinion in Neurology. 2013;26(2):146–53.

7. Zeestraten EA, Gudbrandsen MC, Daly E, De Schotten MT, Catani M, Dell’Acqua F, et al. Sex differences in frontal lobe connectivity in adults with autism spectrum conditions. Transl Psychiatry. 2017;7(4):e1090–.

8. Lai G, Pantazatos SP, Schneider H, Hirsch J. Neural systems for speech and song in autism. Brain. 2012;135(3):961–75.

9. Retico A, Giuliano A, Tancredi R, Cosenza A, Apicella F, Narzisi A, et al. The effect of gender on the neuroanatomy of children with autism spectrum disorders: a support vector machine case-control study. Mol Autism. 2016;7(1):5.

10. Li M, Wang Y, Tachibana M, Rahman S, Kagitani‐Shimono K. Atypical structural connectivity of language networks in autism spectrum disorder: a meta‐analysis of diffusion tensor imaging studies. Autism Res. 2022;15(9):1585–602.

11. Charman T, Pickles A, Simonoff E, Chandler S, Loucas T, Baird G. IQ in children with autism spectrum disorders: data from the Special Needs and Autism Project (SNAP). Psychol Med. 2011;41(3):619–27.

12. Yeh CH, Tseng RY, Ni HC, Cocchi L, Chang JC, Hsu MY, et al. White matter microstructural and morphometric alterations in autism: implications for intellectual capabilities. Mol Autism. 2022;13(1):21.

13. Floris DL, Barber AD, Nebel MB, Martinelli M, Lai MC, Crocetti D, et al. Atypical lateralization of motor circuit functional connectivity in children with autism is associated with motor deficits. Mol Autism. 2016;7(1):35.

14. Herbert MR, Harris GJ, Adrien KT, Ziegler DA, Makris N, Kennedy DN, et al. Abnormal asymmetry in language association cortex in autism. Annals of Neurology. 2002;52(5):588–96.

15. Postema MC, Van Rooij D, Anagnostou E, Arango C, Auzias G, Behrmann M, et al. Altered structural brain asymmetry in autism spectrum disorder in a study of 54 datasets. Nat Commun. 2019;10(1):4958.

16. Lange N, DuBray MB, Lee JE, Froimowitz MP, Froehlich A, Adluru N, et al. Atypical diffusion tensor hemispheric asymmetry in autism. Autism Res. 2010;3(6):350–8.

17. Hickok G, Poeppel D. The cortical organization of speech processing. Nat Rev Neurosci. 2007;8(5):393–402.
